# Supplementary material for: Glacier ice archives nearly 15,000-year-old microbes and phages
Source: Microbiome. 2021 Jul 20;9:160. doi: 10.1186/s40168-021-01106-w (PMC8290583; doi:10.1186/s40168-021-01106-w)
Supplement: Supplementary file 2 — Additional file1: Table S1 Relative abundance and taxonomy of 33 most abundant OTUs in Inner, Wash and Cut parts of two glacier-ice sections. Table S2 Microbial community composition of eight glacier-ice samples at genus level. Table S3 Physical and chemical characteristics of ice samples from the Guliya ice cap. Table S4 Significance of each parameter's influence on the distribution of microbial communities by Mantel tests. Table S5 General statistics for two viromes. Table S6 Taxonomic assignments and viral cluster information of 33 glacier-ice vOTUs and 2,304 RefSeq genomes. Table S7 Adjusted coverage of 33 vOTUs per gigabase of MetaG for two glacier-ice viromes. Table S8 Predicted hosts taxonomy by sequence similarity method (Blastn). Table S9 Predicted hosts taxonomy by sequence composition method (VirHostMatcher). Table S10 Predicted hosts taxonomy by CRISPR similarity method. Table S11 Temperate viruses predicted by VIBRANT from the 33 vOTUs. Table S12 Methylobacterium viruses identified from glacier ice, bacterial genomes in RefSeq database and environmental metagenomes. Table S13 Annotations of all genes from 33 vOTUs. Table S14 Four AMGs identified from glacier-ice viruses. Table S15 Annotations of 70 viral contigs’ genes from the Global Ocean Viromes 2.0 dataset. [file 40168_2021_1106_MOESM1_ESM.xlsx]

## Sheet: Table S1
Supplementary Table S1 Relative abundance and taxonomy of 33 most abundant OTUs in Inner, Wash and Cut parts of two glacier-ice sections in PS ice core
#OTU ID	Relative abundance (%)						Taxonomy
	D13.3.Inner	D13.3.Wash	D13.3.Cut	D13.5.Inner	D13.5.Wash	D13.5.Cut
OTU_8472	9.96667	11.9	9.95833	14.7333	15.025	11.1667	k__Bacteria; p__Actinobacteria; c__Actinobacteria; o__Actinomycetales; f__Microbacteriaceae
OTU_7870	5.15	5.88333	7.30833	9.925	11.9083	9.075	k__Bacteria; p__Actinobacteria; c__Actinobacteria; o__Actinomycetales; f__Microbacteriaceae
OTU_9960	13.8667	8.525	10.6417	8.1	8.94167	9.31667	k__Bacteria; p__Bacteroidetes; c__Flavobacteriia; o__Flavobacteriales; f__Flavobacteriaceae; g__Flavobacterium
OTU_8880	0.291667	0.675	1.24167	7.275	5.89167	5.425	k__Bacteria; p__Proteobacteria; c__Betaproteobacteria; o__Burkholderiales; f__Comamonadaceae
OTU_2	2.4	2.33333	4.66667	4.81667	5.61667	5.10833	k__Bacteria; p__Actinobacteria; c__Actinobacteria; o__Actinomycetales; f__Microbacteriaceae
OTU_8825	3.65	1.59167	6.34167	4.6	2.59167	4.41667	k__Bacteria; p__Proteobacteria; c__Betaproteobacteria; o__Burkholderiales; f__Comamonadaceae
OTU_2966	2.88333	4.13333	3.01667	2.83333	2.59167	2.7	k__Bacteria; p__Actinobacteria; c__Actinobacteria; o__Actinomycetales; f__Microbacteriaceae
OTU_3	2.34167	1.05833	4.125	2.625	1.75833	3.56667	k__Bacteria; p__Proteobacteria; c__Betaproteobacteria; o__Burkholderiales; f__Comamonadaceae; g__Polaromonas; s__
OTU_7996	8.60833	18.5833	1.825	2.56667	5.64167	3.20833	k__Bacteria; p__Proteobacteria; c__Betaproteobacteria; o__Burkholderiales; f__Comamonadaceae
OTU_19	1.03333	0.425	0.0916667	2.275	0.883333	2.05833	k__Bacteria; p__Proteobacteria; c__Betaproteobacteria; o__Burkholderiales; f__Oxalobacteraceae; g__; s__
OTU_1420	1.56667	0.358333	1.5	1.83333	0.141667	2.69167	k__Bacteria; p__Proteobacteria; c__Betaproteobacteria; o__Burkholderiales; f__Comamonadaceae
OTU_24	0.491667	0.0416667	0.0166667	1.83333	0.991667	0.966667	k__Bacteria; p__Proteobacteria; c__Alphaproteobacteria; o__Rhizobiales; f__Hyphomicrobiaceae; g__Devosia; s__
OTU_10129	0.55	0.0833333	0	1.69167	0.666667	1.23333	k__Bacteria; p__Proteobacteria; c__Betaproteobacteria; o__Burkholderiales; f__Oxalobacteraceae
OTU_1186	1.35	0.241667	1.25	1.31667	0.133333	1.975	k__Bacteria; p__Proteobacteria; c__Betaproteobacteria; o__Burkholderiales; f__Comamonadaceae
OTU_51	0.025	0.00833333	0.00833333	1.275	0.075	1.69167	k__Bacteria; p__Bacteroidetes; c__Flavobacteriia; o__Flavobacteriales; f__Flavobacteriaceae; g__Flavobacterium; s__
OTU_8	1.175	0.775	0.566667	1.21667	3.11667	0.766667	k__Bacteria; p__Proteobacteria; c__Betaproteobacteria; o__Burkholderiales; f__Oxalobacteraceae; g__Janthinobacterium; s__
OTU_12	3.06667	3.93333	3.70833	1.15833	1.43333	2.29167	k__Bacteria; p__Actinobacteria; c__Actinobacteria; o__Actinomycetales; f__Sporichthyaceae; g__; s__
OTU_4079	1.4	0.45	1.30833	1.11667	0.2	0.766667	k__Bacteria; p__Bacteroidetes; c__Flavobacteriia; o__Flavobacteriales; f__Flavobacteriaceae; g__Flavobacterium
OTU_3866	1.30833	1.25833	2.4	1.09167	0.266667	1.86667	k__Bacteria; p__Actinobacteria; c__Actinobacteria; o__Actinomycetales; f__Nocardioidaceae; g__Nocardioides; s__
OTU_10868	0.283333	0.516667	0.766667	1.04167	0.475	0.716667	k__Bacteria; p__Actinobacteria; c__Actinobacteria; o__Actinomycetales; f__Microbacteriaceae
OTU_30	0.116667	0.216667	0.866667	0.966667	0.05	0.225	k__Bacteria; p__Proteobacteria; c__Alphaproteobacteria; o__Caulobacterales; f__Caulobacteraceae; g__Mycoplana; s__
OTU_9401	1.825	0.183333	0.3	0.916667	0	0.483333	k__Bacteria; p__Bacteroidetes; c__Sphingobacteriia; o__Sphingobacteriales; f__Sphingobacteriaceae
OTU_10654	2.10833	1.175	0.933333	0.641667	0.225	0.625	k__Bacteria; p__Bacteroidetes; c__Cytophagia; o__Cytophagales; f__Cytophagaceae; g__Hymenobacter; s__
OTU_23	0.608333	1.525	0.833333	0.575	0.916667	0.641667	k__Bacteria; p__Bacteroidetes; c__Sphingobacteriia; o__Sphingobacteriales; f__Sphingobacteriaceae; g__; s__
OTU_8936	0.6	0.433333	1.4	0.491667	0.341667	0.466667	k__Bacteria; p__Proteobacteria; c__Alphaproteobacteria; o__Rhizobiales
OTU_5	0.95	0.6	0.6	0.433333	0.475	0.725	k__Bacteria; p__Bacteroidetes; c__Flavobacteriia; o__Flavobacteriales; f__Flavobacteriaceae; g__Flavobacterium
OTU_8905	2.125	3.48333	1.49167	0.316667	0.291667	0.608333	k__Bacteria; p__Actinobacteria; c__Actinobacteria; o__Actinomycetales
OTU_10382	0.633333	1.70833	0.35	0.216667	0.766667	0.391667	k__Bacteria; p__Proteobacteria; c__Betaproteobacteria; o__Burkholderiales; f__Comamonadaceae
OTU_10	0	1.10833	0	0.175	0	0.333333	k__Bacteria; p__Proteobacteria; c__Gammaproteobacteria; o__Pseudomonadales; f__Moraxellaceae; g__Acinetobacter; s__
OTU_9308	1.58333	0.716667	0.3	0.075	0	0	k__Bacteria; p__Bacteroidetes; c__Sphingobacteriia; o__Sphingobacteriales; f__Sphingobacteriaceae
OTU_8291	4.775	2.88333	2.79167	0.0333333	0.225	0.191667	k__Bacteria; p__Bacteroidetes; c__Cytophagia; o__Cytophagales; f__Cytophagaceae; g__Hymenobacter; s__
OTU_7663	1.86667	1.11667	0.991667	0	0.166667	0.258333	k__Bacteria; p__Bacteroidetes; c__Cytophagia; o__Cytophagales; f__Cytophagaceae; g__Hymenobacter; s__
OTU_121	0	0	0	0	2.125	0	k__Bacteria

## Sheet: Table S2
Supplementary Table S2 Microbial community composition of 8 glacier-ice samples at genus level
#Genera	D13.3	D13.6	D24.1	D33.3	D34.4	D25	D41	D49
Unclassified;Other;Other;Other;Other;Other	0.000291667	0	0.000291667	0.000125	8.33333e-05	8.33333e-05	0	0
k__Archaea;p__Crenarchaeota;c__Thaumarchaeota;o__Nitrososphaerales;f__Nitrososphaeraceae;g__Candidatus Nitrososphaera	0	0	0	0	0	0	0.000125	0
k__Archaea;p__Euryarchaeota;c__Halobacteria;o__Halobacteriales;f__Halobacteriaceae;Other	0	0	0	0	0	0	8.33333e-05	0
k__Archaea;p__Euryarchaeota;c__Halobacteria;o__Halobacteriales;f__Halobacteriaceae;g__Halobacteriaceae	0	0.000166667	0	0	0	0	0	0
k__Archaea;p__Euryarchaeota;c__Methanobacteria;o__Methanobacteriales;f__Methanobacteriaceae;g__Methanobrevibacter	0	0	0	0	0	0	0.000291667	0
k__Archaea;p__Euryarchaeota;c__Thermoplasmata;o__E2;Other;Other	0	0	0	0	0	0	0.00104167	0
k__Bacteria;Other;Other;Other;Other;Other	0.004625	0.00279167	0.00316667	0.00566667	0.002625	0.00433333	0.00025	4.16667e-05
k__Bacteria;p__Acidobacteria;c__Acidobacteria-6;o__iii1-15;f__;g__	4.16667e-05	0	0	0.000791667	0	0	0.000291667	0
k__Bacteria;p__Acidobacteria;c__Acidobacteriia;o__Acidobacteriales;f__Acidobacteriaceae;g__	0	0	0.00025	0	0	0	0	0
k__Bacteria;p__Acidobacteria;c__Solibacteres;o__Solibacterales;f__Solibacteraceae;g__Candidatus Solibacter	0	0	0	0	0	0	8.33333e-05	0
k__Bacteria;p__Acidobacteria;c__[Chloracidobacteria];o__RB41;f__;g__	0	0.000166667	0	0	0	0	0	0
k__Bacteria;p__Acidobacteria;c__[Chloracidobacteria];o__RB41;f__Ellin6075;g__	0	0.000166667	0	0	0	0	0	0
k__Bacteria;p__Actinobacteria;Other;Other;Other;Other	0	0	0	0	0	0.000125	0	0
k__Bacteria;p__Actinobacteria;c__Acidimicrobiia;o__Acidimicrobiales;f__;g__	0	8.33333e-05	0	0	0.000416667	0	0.000291667	0
k__Bacteria;p__Actinobacteria;c__Acidimicrobiia;o__Acidimicrobiales;f__OCS155;g__	4.16667e-05	0	0	0	0	0	0	0
k__Bacteria;p__Actinobacteria;c__Actinobacteria;o__Actinomycetales;Other;Other	0.0232917	0.00404167	0.00966667	0.0129583	0.00266667	0	0.00075	4.16667e-05
k__Bacteria;p__Actinobacteria;c__Actinobacteria;o__Actinomycetales;f__ACK-M1;g__	0	0	0	0	0	4.16667e-05	0	0.004875
k__Bacteria;p__Actinobacteria;c__Actinobacteria;o__Actinomycetales;f__Cellulomonadaceae;g__Cellulomonas	4.16667e-05	0	0	0	0	0	0.000416667	0
k__Bacteria;p__Actinobacteria;c__Actinobacteria;o__Actinomycetales;f__Corynebacteriaceae;g__Corynebacterium	0	0.000625	0	0.000208333	4.16667e-05	4.16667e-05	0	0
k__Bacteria;p__Actinobacteria;c__Actinobacteria;o__Actinomycetales;f__Dermabacteraceae;g__Dermabacter	0	0	0	0	0	0.00025	0	0
k__Bacteria;p__Actinobacteria;c__Actinobacteria;o__Actinomycetales;f__Geodermatophilaceae;Other	0	0	8.33333e-05	4.16667e-05	0.000208333	0	0.000458333	0
k__Bacteria;p__Actinobacteria;c__Actinobacteria;o__Actinomycetales;f__Geodermatophilaceae;g__	0	4.16667e-05	4.16667e-05	0	0	0	0	0
k__Bacteria;p__Actinobacteria;c__Actinobacteria;o__Actinomycetales;f__Geodermatophilaceae;g__Geodermatophilus	0	0.000166667	4.16667e-05	0	8.33333e-05	0	0.000166667	0
k__Bacteria;p__Actinobacteria;c__Actinobacteria;o__Actinomycetales;f__Geodermatophilaceae;g__Modestobacter	0	0.000166667	0	0	0	0	0.000958333	0
k__Bacteria;p__Actinobacteria;c__Actinobacteria;o__Actinomycetales;f__Intrasporangiaceae;Other	0	0.000291667	0.000166667	0	0	8.33333e-05	0.000125	0
k__Bacteria;p__Actinobacteria;c__Actinobacteria;o__Actinomycetales;f__Intrasporangiaceae;g__	0	0	0	4.16667e-05	0	0	0	0
k__Bacteria;p__Actinobacteria;c__Actinobacteria;o__Actinomycetales;f__Kineosporiaceae;g__	0.00025	0.00025	0	0.000208333	0	0	0.000333333	0
k__Bacteria;p__Actinobacteria;c__Actinobacteria;o__Actinomycetales;f__Microbacteriaceae;Other	0.23425	0.377292	0.0455417	0.485292	0.0706667	0.0152083	0.108042	4.16667e-05
k__Bacteria;p__Actinobacteria;c__Actinobacteria;o__Actinomycetales;f__Microbacteriaceae;g__Cryobacterium	0.000208333	0.00025	0	0.000666667	0.000125	0	4.16667e-05	0
k__Bacteria;p__Actinobacteria;c__Actinobacteria;o__Actinomycetales;f__Microbacteriaceae;g__Salinibacterium	0.000166667	0.000541667	0	0	4.16667e-05	0	0	0
k__Bacteria;p__Actinobacteria;c__Actinobacteria;o__Actinomycetales;f__Micrococcaceae;Other	0	4.16667e-05	8.33333e-05	0	0	0	0.000666667	0
k__Bacteria;p__Actinobacteria;c__Actinobacteria;o__Actinomycetales;f__Micrococcaceae;g__Arthrobacter	0	0.00104167	8.33333e-05	0.000583333	0	0	0	0
k__Bacteria;p__Actinobacteria;c__Actinobacteria;o__Actinomycetales;f__Micrococcaceae;g__Renibacterium	0	0	0	0	0	0.0275	0	0
k__Bacteria;p__Actinobacteria;c__Actinobacteria;o__Actinomycetales;f__Micrococcaceae;g__Rothia	0	0	0	0	0	8.33333e-05	0	0
k__Bacteria;p__Actinobacteria;c__Actinobacteria;o__Actinomycetales;f__Micromonosporaceae;Other	0	0.000125	0	0	0	0	0	0
k__Bacteria;p__Actinobacteria;c__Actinobacteria;o__Actinomycetales;f__Mycobacteriaceae;g__Mycobacterium	0	0	0	0	0	8.33333e-05	0	0
k__Bacteria;p__Actinobacteria;c__Actinobacteria;o__Actinomycetales;f__Nocardioidaceae;Other	0.001	0.00291667	0.000666667	0.001	0	0	0.000166667	0
k__Bacteria;p__Actinobacteria;c__Actinobacteria;o__Actinomycetales;f__Nocardioidaceae;g__	0.00158333	4.16667e-05	4.16667e-05	0.000791667	0	0	0	0
k__Bacteria;p__Actinobacteria;c__Actinobacteria;o__Actinomycetales;f__Nocardioidaceae;g__Aeromicrobium	0.00629167	0.00525	0.000291667	0.0103333	0	0	0	0
k__Bacteria;p__Actinobacteria;c__Actinobacteria;o__Actinomycetales;f__Nocardioidaceae;g__Nocardioides	0.015	0.011625	0.00191667	0.00241667	0	0	0	0
k__Bacteria;p__Actinobacteria;c__Actinobacteria;o__Actinomycetales;f__Sanguibacteraceae;g__Sanguibacter	0.000541667	4.16667e-05	0	0	0	0	0	0
k__Bacteria;p__Actinobacteria;c__Actinobacteria;o__Actinomycetales;f__Sporichthyaceae;g__	0.0335417	0.012875	0.014375	0.01875	0.00629167	0	0.000375	0
k__Bacteria;p__Actinobacteria;c__Actinobacteria;o__Actinomycetales;f__Thermomonosporaceae;g__Actinocorallia	0	0	0	0	0.000166667	0	0	0
k__Bacteria;p__Actinobacteria;c__Rubrobacteria;o__Rubrobacterales;f__Rubrobacteraceae;g__Rubrobacter	0	0.000291667	8.33333e-05	0.000541667	0	0	0.000208333	0
k__Bacteria;p__Actinobacteria;c__Thermoleophilia;o__Gaiellales;f__AK1AB1_02E;g__	0	0	0.000125	0	0	0	0	0
k__Bacteria;p__Actinobacteria;c__Thermoleophilia;o__Gaiellales;f__Gaiellaceae;g__	0	0	8.33333e-05	0	0	0	0	0
k__Bacteria;p__Actinobacteria;c__Thermoleophilia;o__Solirubrobacterales;f__;g__	0	8.33333e-05	0	0.00075	0	0	0	0
k__Bacteria;p__Actinobacteria;c__Thermoleophilia;o__Solirubrobacterales;f__Conexibacteraceae;Other	0	0	0	0	0.000333333	0	0	0
k__Bacteria;p__Actinobacteria;c__Thermoleophilia;o__Solirubrobacterales;f__Solirubrobacteraceae;Other	0	0	0	0	0	0	4.16667e-05	0
k__Bacteria;p__Actinobacteria;c__Thermoleophilia;o__Solirubrobacterales;f__Solirubrobacteraceae;g__	0.000583333	0.000333333	0.000125	0	0	0	0.000125	0
k__Bacteria;p__Bacteroidetes;Other;Other;Other;Other	0.000541667	0	4.16667e-05	0	0.000458333	0	0	0
k__Bacteria;p__Bacteroidetes;c__Bacteroidia;o__Bacteroidales;f__Bacteroidaceae;g__Bacteroides	0.000125	0	0	4.16667e-05	0	4.16667e-05	0	0
k__Bacteria;p__Bacteroidetes;c__Bacteroidia;o__Bacteroidales;f__Porphyromonadaceae;g__Parabacteroides	8.33333e-05	0	0	0	0	0	0	0
k__Bacteria;p__Bacteroidetes;c__Bacteroidia;o__Bacteroidales;f__S24-7;g__	0	0	8.33333e-05	0	0	0	0	0
k__Bacteria;p__Bacteroidetes;c__Cytophagia;o__Cytophagales;Other;Other	0.004625	4.16667e-05	0.000958333	0.000125	0.018625	0	0	0
k__Bacteria;p__Bacteroidetes;c__Cytophagia;o__Cytophagales;f__Cytophagaceae;Other	8.33333e-05	0	0	4.16667e-05	0.000875	0	0	0
k__Bacteria;p__Bacteroidetes;c__Cytophagia;o__Cytophagales;f__Cytophagaceae;g__	0	0	0	0	0	8.33333e-05	8.33333e-05	0
k__Bacteria;p__Bacteroidetes;c__Cytophagia;o__Cytophagales;f__Cytophagaceae;g__Cytophaga	0.001375	0	0.00820833	0	0	0	0	0
k__Bacteria;p__Bacteroidetes;c__Cytophagia;o__Cytophagales;f__Cytophagaceae;g__Flectobacillus	0.00370833	0.003	0.00791667	0.0512917	0.00195833	0	0	0
k__Bacteria;p__Bacteroidetes;c__Cytophagia;o__Cytophagales;f__Cytophagaceae;g__Hymenobacter	0.110458	0.00841667	0.0219583	0.01925	0.395917	0	0.000583333	0
k__Bacteria;p__Bacteroidetes;c__Cytophagia;o__Cytophagales;f__Cytophagaceae;g__Pontibacter	0	0	0	0	0	0	0	8.33333e-05
k__Bacteria;p__Bacteroidetes;c__Cytophagia;o__Cytophagales;f__Cytophagaceae;g__Spirosoma	0	4.16667e-05	0	0	0	0.000416667	0	0
k__Bacteria;p__Bacteroidetes;c__Cytophagia;o__Cytophagales;f__Flammeovirgaceae;g__	0	0	0	0	0	0	0.00025	0
k__Bacteria;p__Bacteroidetes;c__Flavobacteriia;o__Flavobacteriales;f__Flavobacteriaceae;Other	0.000208333	0.00025	0	0	0	0	0	0
k__Bacteria;p__Bacteroidetes;c__Flavobacteriia;o__Flavobacteriales;f__Flavobacteriaceae;g__	4.16667e-05	4.16667e-05	0	8.33333e-05	0	4.16667e-05	0	0
k__Bacteria;p__Bacteroidetes;c__Flavobacteriia;o__Flavobacteriales;f__Flavobacteriaceae;g__Flavobacterium	0.1865	0.130292	0.033875	0.1055	0.235875	0.00825	0.0435417	0.000125
k__Bacteria;p__Bacteroidetes;c__Flavobacteriia;o__Flavobacteriales;f__[Weeksellaceae];g__Chryseobacterium	0.000833333	8.33333e-05	0	0	4.16667e-05	0	0	0
k__Bacteria;p__Bacteroidetes;c__Sphingobacteriia;o__Sphingobacteriales;f__;g__	0.000875	0	0	0	0.000166667	0	0	0
k__Bacteria;p__Bacteroidetes;c__Sphingobacteriia;o__Sphingobacteriales;f__Sphingobacteriaceae;Other	0.0415833	0.0129167	0.208833	4.16667e-05	0.00375	8.33333e-05	0.00025	0
k__Bacteria;p__Bacteroidetes;c__Sphingobacteriia;o__Sphingobacteriales;f__Sphingobacteriaceae;g__	0.00879167	0.00866667	0.0112917	0	0	0	0	0
k__Bacteria;p__Bacteroidetes;c__Sphingobacteriia;o__Sphingobacteriales;f__Sphingobacteriaceae;g__Pedobacter	4.16667e-05	0.00429167	0.0154167	0	0	0	0	0
k__Bacteria;p__Bacteroidetes;c__[Saprospirae];o__[Saprospirales];f__Chitinophagaceae;g__	0.00454167	0.00191667	0.000291667	0.000833333	0	0	0	0
k__Bacteria;p__Bacteroidetes;c__[Saprospirae];o__[Saprospirales];f__Chitinophagaceae;g__Niabella	0.000166667	8.33333e-05	0.000208333	8.33333e-05	8.33333e-05	0.00025	0	0
k__Bacteria;p__Bacteroidetes;c__[Saprospirae];o__[Saprospirales];f__Chitinophagaceae;g__Sediminibacterium	4.16667e-05	4.16667e-05	0	0	4.16667e-05	4.16667e-05	0	0
k__Bacteria;p__Bacteroidetes;c__[Saprospirae];o__[Saprospirales];f__Chitinophagaceae;g__Segetibacter	0	0	4.16667e-05	0	0	0	0.000166667	0
k__Bacteria;p__Chlamydiae;c__Chlamydiia;o__Chlamydiales;f__Parachlamydiaceae;g__	0	0	0	0.00141667	0	0	0	0
k__Bacteria;p__Chlamydiae;c__Chlamydiia;o__Chlamydiales;f__Rhabdochlamydiaceae;g__Candidatus Rhabdochlamydia	0.000375	0	0	0	0	0	0	0
k__Bacteria;p__Chlorobi;c__Ignavibacteria;o__Ignavibacteriales;f__Ignavibacteriaceae;g__	4.16667e-05	0	0	0	0	0	0	4.16667e-05
k__Bacteria;p__Chlorobi;c__SJA-28;o__;f__;g__	0	0	0	0	0	0	0	4.16667e-05
k__Bacteria;p__Chloroflexi;c__Anaerolineae;o__H39;f__;g__	0	0	0	0	0.000583333	0	0	0
k__Bacteria;p__Chloroflexi;c__Chloroflexi;o__AKIW781;f__;g__	0	0	0	4.16667e-05	0	0	0	0
k__Bacteria;p__Chloroflexi;c__Gitt-GS-136;o__;f__;g__	0	0	0	0.000875	0	0	0	0
k__Bacteria;p__Chloroflexi;c__TK10;Other;Other;Other	0	0	0	4.16667e-05	0	0	0	0
k__Bacteria;p__Chloroflexi;c__Thermomicrobia;o__JG30-KF-CM45;f__;g__	0	0	0	0.000291667	0	0	8.33333e-05	0
k__Bacteria;p__Chloroflexi;c__[Thermobacula];o__[Thermobaculales];f__[Thermobaculaceae];g__Thermobaculum	0	0	0	0	0	0	0.000291667	0
k__Bacteria;p__Cyanobacteria;Other;Other;Other;Other	0	0	4.16667e-05	0	0.00154167	0	0	0
k__Bacteria;p__Cyanobacteria;c__;o__;f__;g__	0	8.33333e-05	0	0	0	0	0	0
k__Bacteria;p__Cyanobacteria;c__Nostocophycideae;o__;f__;g__	0	0	0	0	0	0	0.00025	0
k__Bacteria;p__Cyanobacteria;c__Synechococcophycideae;o__Pseudanabaenales;f__Pseudanabaenaceae;g__Leptolyngbya	4.16667e-05	8.33333e-05	0	0	0	0	0	0
k__Bacteria;p__Cyanobacteria;c__Synechococcophycideae;o__Synechococcales;f__Chamaesiphonaceae;g__	0	0	0.000375	0	0	0	0	0
k__Bacteria;p__Firmicutes;c__Bacilli;o__Bacillales;Other;Other	0.001875	0.000208333	4.16667e-05	0.00395833	0.00154167	8.33333e-05	0.000708333	0
k__Bacteria;p__Firmicutes;c__Bacilli;o__Bacillales;f__Alicyclobacillaceae;g__Alicyclobacillus	0	0	0	0	0	0	0.000166667	0
k__Bacteria;p__Firmicutes;c__Bacilli;o__Bacillales;f__Bacillaceae;Other	0.000791667	0.000541667	8.33333e-05	0.000375	0.00245833	0	0.000583333	0
k__Bacteria;p__Firmicutes;c__Bacilli;o__Bacillales;f__Bacillaceae;g__Bacillus	0.000166667	0.000333333	0.000208333	0.000166667	0.00175	0	0.000541667	0
k__Bacteria;p__Firmicutes;c__Bacilli;o__Bacillales;f__Paenibacillaceae;Other	0.000208333	0	0	0	0	0	0	0
k__Bacteria;p__Firmicutes;c__Bacilli;o__Bacillales;f__Paenibacillaceae;g__	0	0	0	0.000333333	0	0	0	0
k__Bacteria;p__Firmicutes;c__Bacilli;o__Bacillales;f__Paenibacillaceae;g__Ammoniphilus	0	0.000541667	0	0	0	0	0.000375	0
k__Bacteria;p__Firmicutes;c__Bacilli;o__Bacillales;f__Paenibacillaceae;g__Cohnella	0	8.33333e-05	0	0	0	0	0	0
k__Bacteria;p__Firmicutes;c__Bacilli;o__Bacillales;f__Paenibacillaceae;g__Paenibacillus	0	0.000166667	0	0.000458333	0	0	0	0
k__Bacteria;p__Firmicutes;c__Bacilli;o__Bacillales;f__Planococcaceae;Other	0	0.000166667	0.000125	0	0.000166667	0	8.33333e-05	0
k__Bacteria;p__Firmicutes;c__Bacilli;o__Bacillales;f__Planococcaceae;g__Paenisporosarcina	8.33333e-05	4.16667e-05	0	0	0	0	0	0
k__Bacteria;p__Firmicutes;c__Bacilli;o__Bacillales;f__Planococcaceae;g__Planomicrobium	8.33333e-05	0.000458333	0	0.000833333	0	0	0	0
k__Bacteria;p__Firmicutes;c__Bacilli;o__Bacillales;f__Staphylococcaceae;g__Jeotgalicoccus	0	0	0	0.000208333	0	0	0	0
k__Bacteria;p__Firmicutes;c__Bacilli;o__Bacillales;f__[Exiguobacteraceae];Other	0	8.33333e-05	0	0	0	0	0	0
k__Bacteria;p__Firmicutes;c__Bacilli;o__Lactobacillales;Other;Other	0	0	0	0	0	8.33333e-05	0	0
k__Bacteria;p__Firmicutes;c__Bacilli;o__Lactobacillales;f__Aerococcaceae;g__Aerococcus	0	0	0.000125	0	0	0	0	0
k__Bacteria;p__Firmicutes;c__Bacilli;o__Lactobacillales;f__Aerococcaceae;g__Alloiococcus	0	0	0	0	0	0.000125	0	0
k__Bacteria;p__Firmicutes;c__Bacilli;o__Lactobacillales;f__Carnobacteriaceae;g__Carnobacterium	0	0.000625	0	0.00025	0	0	0	0
k__Bacteria;p__Firmicutes;c__Bacilli;o__Lactobacillales;f__Lactobacillaceae;g__Lactobacillus	0	0	0	0	0	0.000125	0	0.00679167
k__Bacteria;p__Firmicutes;c__Bacilli;o__Lactobacillales;f__Streptococcaceae;g__Lactococcus	0	0	0	0	0	0.0015	0	0
k__Bacteria;p__Firmicutes;c__Bacilli;o__Lactobacillales;f__Streptococcaceae;g__Streptococcus	0.000166667	0	8.33333e-05	0.000166667	0.000541667	0	0	0
k__Bacteria;p__Firmicutes;c__Clostridia;o__;f__;g__	0	8.33333e-05	0	0.000166667	0	0	0.000166667	0
k__Bacteria;p__Firmicutes;c__Clostridia;o__Clostridiales;Other;Other	0	0	0.000125	8.33333e-05	0.000583333	0	0.000125	0
k__Bacteria;p__Firmicutes;c__Clostridia;o__Clostridiales;f__Clostridiaceae;g__Clostridium	0.000166667	0	0	0	0	0	0.000166667	0
k__Bacteria;p__Firmicutes;c__Clostridia;o__Clostridiales;f__Clostridiaceae;g__Thermoanaerobacterium	0.000416667	0	0.000125	0.000625	0.00204167	0	0	0
k__Bacteria;p__Firmicutes;c__Clostridia;o__Clostridiales;f__Gracilibacteraceae;g__Gracilibacter	4.16667e-05	0	0	0	0	0	4.16667e-05	0
k__Bacteria;p__Firmicutes;c__Clostridia;o__Clostridiales;f__Lachnospiraceae;g__	0	0	0	0	0	0	8.33333e-05	0
k__Bacteria;p__Firmicutes;c__Clostridia;o__Clostridiales;f__Ruminococcaceae;Other	0	0.000208333	0	0	0	0	0.000166667	0
k__Bacteria;p__Firmicutes;c__Clostridia;o__Clostridiales;f__Ruminococcaceae;g__Faecalibacterium	4.16667e-05	4.16667e-05	4.16667e-05	0.000125	4.16667e-05	4.16667e-05	0	0
k__Bacteria;p__Firmicutes;c__Clostridia;o__Clostridiales;f__Symbiobacteriaceae;g__Symbiobacterium	0	0	0	0	0	0	0.000416667	0
k__Bacteria;p__Firmicutes;c__Clostridia;o__Clostridiales;f__Veillonellaceae;g__Veillonella	0	0	0	0	0	0.000208333	0.000166667	0
k__Bacteria;p__Firmicutes;c__Clostridia;o__Clostridiales;f__[Tissierellaceae];g__Anaerococcus	0	0	0	0	0	0.000708333	0	0
k__Bacteria;p__Firmicutes;c__Clostridia;o__Clostridiales;f__[Tissierellaceae];g__Finegoldia	0	0	0	0	0	0.00075	4.16667e-05	0
k__Bacteria;p__Firmicutes;c__Clostridia;o__Clostridiales;f__[Tissierellaceae];g__WAL_1855D	0	0	0	0	0	0.000125	0	0
k__Bacteria;p__Firmicutes;c__Clostridia;o__Halanaerobiales;f__Halanaerobiaceae;g__Halanaerobium	4.16667e-05	0.000208333	8.33333e-05	4.16667e-05	4.16667e-05	0	0	0
k__Bacteria;p__Firmicutes;c__Erysipelotrichi;o__Erysipelotrichales;f__Erysipelotrichaceae;g__Allobaculum	0	4.16667e-05	0	0	0	0	0	0
k__Bacteria;p__Fusobacteria;c__Fusobacteriia;o__Fusobacteriales;f__Fusobacteriaceae;g__Fusobacterium	0	0	0	0	0	8.33333e-05	0	0
k__Bacteria;p__GN02;c__BD1-5;o__;f__;g__	0.000208333	0	0.00291667	4.16667e-05	0	0	0	0
k__Bacteria;p__Gemmatimonadetes;c__Gemm-3;o__;f__;g__	0	0	0	0.000458333	0	0	0.000208333	0
k__Bacteria;p__Gemmatimonadetes;c__Gemm-5;o__;f__;g__	0	0	0.000125	0	0	0	0.0005	0
k__Bacteria;p__Gemmatimonadetes;c__Gemmatimonadetes;Other;Other;Other	0	0	0	0	0	0	4.16667e-05	0
k__Bacteria;p__OD1;c__;o__;f__;g__	0	0.000458333	0	0	0	0	0	0
k__Bacteria;p__OD1;c__ABY1;o__;f__;g__	0	0.000166667	0	0	0	0	0	0
k__Bacteria;p__OD1;c__SM2F11;o__;f__;g__	0	8.33333e-05	0	0	0	0	0	0
k__Bacteria;p__OD1;c__ZB2;o__;f__;g__	0.000458333	0.000166667	0	0.00025	0.001125	0	0	0
k__Bacteria;p__OP11;c__OP11-3;o__;f__;g__	0	0	0	0	0.000208333	0	0	0
k__Bacteria;p__OP3;c__koll11;o__GIF10;f__kpj58rc;g__	0	0	0	0.000958333	0	0	0	0
k__Bacteria;p__Planctomycetes;c__Phycisphaerae;o__WD2101;f__;g__	0	0	0	0	0	0	0.000208333	0
k__Bacteria;p__Planctomycetes;c__Planctomycetia;o__Gemmatales;f__Gemmataceae;g__Gemmata	0	0	4.16667e-05	0	0	0	0	0
k__Bacteria;p__Planctomycetes;c__Planctomycetia;o__Gemmatales;f__Isosphaeraceae;g__	0	0	0.00025	0	0	0	0	0
k__Bacteria;p__Proteobacteria;Other;Other;Other;Other	8.33333e-05	0	4.16667e-05	0	4.16667e-05	0	0	0
k__Bacteria;p__Proteobacteria;c__Alphaproteobacteria;Other;Other;Other	0.00116667	0.00025	0.000791667	0.000125	0	0.000291667	0	0
k__Bacteria;p__Proteobacteria;c__Alphaproteobacteria;o__;f__;g__	0.000125	0	0	0	4.16667e-05	4.16667e-05	0	0
k__Bacteria;p__Proteobacteria;c__Alphaproteobacteria;o__Caulobacterales;f__Caulobacteraceae;Other	8.33333e-05	8.33333e-05	0.000166667	0	0	0	0	0
k__Bacteria;p__Proteobacteria;c__Alphaproteobacteria;o__Caulobacterales;f__Caulobacteraceae;g__	0	0	0.000166667	0	0	0.000125	0	0
k__Bacteria;p__Proteobacteria;c__Alphaproteobacteria;o__Caulobacterales;f__Caulobacteraceae;g__Mycoplana	0.004875	0.0150417	0.00075	0	0	0	0	0
k__Bacteria;p__Proteobacteria;c__Alphaproteobacteria;o__Ellin329;f__;g__	0	0	0	0	0	0	8.33333e-05	0
k__Bacteria;p__Proteobacteria;c__Alphaproteobacteria;o__Rhizobiales;Other;Other	0.0102083	0.0115417	0.00329167	0.000625	0.001125	0.000958333	0.00025	4.16667e-05
k__Bacteria;p__Proteobacteria;c__Alphaproteobacteria;o__Rhizobiales;f__Aurantimonadaceae;Other	0.000333333	0.00166667	0.00025	0	0	0	0	0
k__Bacteria;p__Proteobacteria;c__Alphaproteobacteria;o__Rhizobiales;f__Beijerinckiaceae;g__Beijerinckia	0	0	0.000333333	0	0	0	0	0
k__Bacteria;p__Proteobacteria;c__Alphaproteobacteria;o__Rhizobiales;f__Bradyrhizobiaceae;g__	0	0	0	0	0	0	8.33333e-05	0
k__Bacteria;p__Proteobacteria;c__Alphaproteobacteria;o__Rhizobiales;f__Bradyrhizobiaceae;g__Balneimonas	0	8.33333e-05	0	0.000541667	0	0	0	0
k__Bacteria;p__Proteobacteria;c__Alphaproteobacteria;o__Rhizobiales;f__Hyphomicrobiaceae;g__	0.000291667	0	0	0	0	0	0	0
k__Bacteria;p__Proteobacteria;c__Alphaproteobacteria;o__Rhizobiales;f__Hyphomicrobiaceae;g__Devosia	0.00725	0.0209583	0.00129167	0	0.000333333	0	4.16667e-05	0
k__Bacteria;p__Proteobacteria;c__Alphaproteobacteria;o__Rhizobiales;f__Methylobacteriaceae;Other	0	0	0	0	0	0.00104167	0.00458333	0.002125
k__Bacteria;p__Proteobacteria;c__Alphaproteobacteria;o__Rhizobiales;f__Methylobacteriaceae;g__	8.33333e-05	0	0	0	0	0.0834583	0.108625	0.049875
k__Bacteria;p__Proteobacteria;c__Alphaproteobacteria;o__Rhizobiales;f__Methylobacteriaceae;g__Methylobacterium	4.16667e-05	0	0	0	4.16667e-05	0.674833	0.673333	0.181792
k__Bacteria;p__Proteobacteria;c__Alphaproteobacteria;o__Rhizobiales;f__Methylocystaceae;g__	0	0	0.000916667	0	0	0	0	0
k__Bacteria;p__Proteobacteria;c__Alphaproteobacteria;o__Rhizobiales;f__Phyllobacteriaceae;Other	0	0	0	0	0	0	4.16667e-05	0
k__Bacteria;p__Proteobacteria;c__Alphaproteobacteria;o__Rhizobiales;f__Phyllobacteriaceae;g__Mesorhizobium	0	0	0	0	0	0	0.000166667	0
k__Bacteria;p__Proteobacteria;c__Alphaproteobacteria;o__Rhizobiales;f__Phyllobacteriaceae;g__Phyllobacterium	0	0	0	0	0	0	0.00158333	0
k__Bacteria;p__Proteobacteria;c__Alphaproteobacteria;o__Rhodobacterales;f__Hyphomonadaceae;g__	0.000208333	0	0	0	0	0	0	0
k__Bacteria;p__Proteobacteria;c__Alphaproteobacteria;o__Rhodobacterales;f__Rhodobacteraceae;Other	4.16667e-05	0.000541667	8.33333e-05	0	0	0	8.33333e-05	0
k__Bacteria;p__Proteobacteria;c__Alphaproteobacteria;o__Rhodobacterales;f__Rhodobacteraceae;g__	0	4.16667e-05	8.33333e-05	0	4.16667e-05	0	0	0
k__Bacteria;p__Proteobacteria;c__Alphaproteobacteria;o__Rhodobacterales;f__Rhodobacteraceae;g__Paracoccus	0	0	0	0	0	0.000166667	0	0
k__Bacteria;p__Proteobacteria;c__Alphaproteobacteria;o__Rhodobacterales;f__Rhodobacteraceae;g__Rhodobacter	0.000791667	0.00429167	0.000916667	0.00104167	0	0	0	0
k__Bacteria;p__Proteobacteria;c__Alphaproteobacteria;o__Rhodobacterales;f__Rhodobacteraceae;g__Rubellimicrobium	0	0	0.000166667	0.000458333	0	0	0.000125	0
k__Bacteria;p__Proteobacteria;c__Alphaproteobacteria;o__Rhodospirillales;f__Acetobacteraceae;Other	0	0	0	0.000333333	0	0	0.000125	0
k__Bacteria;p__Proteobacteria;c__Alphaproteobacteria;o__Rhodospirillales;f__Acetobacteraceae;g__	0	0	0.00025	8.33333e-05	0	0	0	0
k__Bacteria;p__Proteobacteria;c__Alphaproteobacteria;o__Rhodospirillales;f__Acetobacteraceae;g__Gluconobacter	0	0	0	0	0	8.33333e-05	0	0
k__Bacteria;p__Proteobacteria;c__Alphaproteobacteria;o__Rickettsiales;f__AEGEAN_112;g__	0.000125	8.33333e-05	0	8.33333e-05	0	4.16667e-05	0	0
k__Bacteria;p__Proteobacteria;c__Alphaproteobacteria;o__Rickettsiales;f__Pelagibacteraceae;g__	0.000333333	0.000125	0.000208333	0	0	0.000375	0	0
k__Bacteria;p__Proteobacteria;c__Alphaproteobacteria;o__Sphingomonadales;f__;g__	0	0.000708333	0.002875	0	0	0	0	0
k__Bacteria;p__Proteobacteria;c__Alphaproteobacteria;o__Sphingomonadales;f__Erythrobacteraceae;Other	0	0	4.16667e-05	0	0	0	0	0
k__Bacteria;p__Proteobacteria;c__Alphaproteobacteria;o__Sphingomonadales;f__Sphingomonadaceae;Other	0.001375	0.000208333	0.000625	0	0	4.16667e-05	0	0.0005
k__Bacteria;p__Proteobacteria;c__Alphaproteobacteria;o__Sphingomonadales;f__Sphingomonadaceae;g__	0.000333333	0	0	0	0	0	0	0
k__Bacteria;p__Proteobacteria;c__Alphaproteobacteria;o__Sphingomonadales;f__Sphingomonadaceae;g__Kaistobacter	0.002	0.000166667	0.00225	4.16667e-05	0	0.000125	0.000416667	0
k__Bacteria;p__Proteobacteria;c__Alphaproteobacteria;o__Sphingomonadales;f__Sphingomonadaceae;g__Novosphingobium	0.000291667	0	0.000125	0	0	0	0	0
k__Bacteria;p__Proteobacteria;c__Alphaproteobacteria;o__Sphingomonadales;f__Sphingomonadaceae;g__Sphingomonas	0	0	0.000375	0.00129167	0	0.0136667	0.00666667	0.753417
k__Bacteria;p__Proteobacteria;c__Alphaproteobacteria;o__Sphingomonadales;f__Sphingomonadaceae;g__Zymomonas	0.00125	0	0	0	0	0	0	0
k__Bacteria;p__Proteobacteria;c__Betaproteobacteria;Other;Other;Other	0.00104167	0.000833333	0.005875	0.00191667	0.00108333	0.00308333	0.000666667	0
k__Bacteria;p__Proteobacteria;c__Betaproteobacteria;o__Burkholderiales;Other;Other	0.00125	0.00354167	0.002125	0.0246667	0.000333333	0.00204167	0.000416667	0
k__Bacteria;p__Proteobacteria;c__Betaproteobacteria;o__Burkholderiales;f__Comamonadaceae;Other	0.205375	0.243	0.2055	0.164542	0.154667	0.0110417	0.0065	0
k__Bacteria;p__Proteobacteria;c__Betaproteobacteria;o__Burkholderiales;f__Comamonadaceae;g__Polaromonas	0.0265833	0.0275	0.0338333	0.026375	0.04125	0.000458333	0.000625	0
k__Bacteria;p__Proteobacteria;c__Betaproteobacteria;o__Burkholderiales;f__Comamonadaceae;g__Rhodoferax	0	4.16667e-05	0	0	0	0	0	0
k__Bacteria;p__Proteobacteria;c__Betaproteobacteria;o__Burkholderiales;f__Oxalobacteraceae;Other	0.00725	0.02325	0.0801667	0.00308333	0.00304167	0.00695833	0.000625	0
k__Bacteria;p__Proteobacteria;c__Betaproteobacteria;o__Burkholderiales;f__Oxalobacteraceae;g__	0.0100417	0.024125	0.00191667	0.00125	0.0065	0	0	0
k__Bacteria;p__Proteobacteria;c__Betaproteobacteria;o__Burkholderiales;f__Oxalobacteraceae;g__Herminiimonas	0.00320833	0.00329167	0.0113333	0.0174583	0.02225	0.0657917	0.016625	8.33333e-05
k__Bacteria;p__Proteobacteria;c__Betaproteobacteria;o__Burkholderiales;f__Oxalobacteraceae;g__Janthinobacterium	0.013	0.012625	0.238458	0.00745833	0.0103333	0.0708333	0.0103333	8.33333e-05
k__Bacteria;p__Proteobacteria;c__Betaproteobacteria;o__Burkholderiales;f__Oxalobacteraceae;g__Massilia	0	0	0	0	0	0.000166667	0	0
k__Bacteria;p__Proteobacteria;c__Betaproteobacteria;o__Burkholderiales;f__Oxalobacteraceae;g__Ralstonia	0	0.000166667	0	0.00129167	0	0	0	0
k__Bacteria;p__Proteobacteria;c__Betaproteobacteria;o__Methylophilales;f__Methylophilaceae;Other	0	0	0	0.00183333	0	0	0	0
k__Bacteria;p__Proteobacteria;c__Betaproteobacteria;o__Methylophilales;f__Methylophilaceae;g__Methylotenera	8.33333e-05	0.000916667	0.001	0.00895833	0	8.33333e-05	0	0
k__Bacteria;p__Proteobacteria;c__Betaproteobacteria;o__Neisseriales;f__Neisseriaceae;Other	0	0	0	0	0.00075	8.33333e-05	0	0
k__Bacteria;p__Proteobacteria;c__Betaproteobacteria;o__Neisseriales;f__Neisseriaceae;g__	0	0	0	0	0	8.33333e-05	0	0
k__Bacteria;p__Proteobacteria;c__Betaproteobacteria;o__Neisseriales;f__Neisseriaceae;g__Neisseria	0	0	0	0	0	0.000541667	0	0
k__Bacteria;p__Proteobacteria;c__Betaproteobacteria;o__Neisseriales;f__Neisseriaceae;g__Vogesella	8.33333e-05	0	0	0	0	4.16667e-05	0	0
k__Bacteria;p__Proteobacteria;c__Betaproteobacteria;o__Rhodocyclales;f__Rhodocyclaceae;Other	0	0	0	0	0	4.16667e-05	0	0
k__Bacteria;p__Proteobacteria;c__Betaproteobacteria;o__Rhodocyclales;f__Rhodocyclaceae;g__Azoarcus	0	8.33333e-05	8.33333e-05	0	0	0	0	0
k__Bacteria;p__Proteobacteria;c__Betaproteobacteria;o__SC-I-84;f__;g__	0	0	0	0	0	0	0.000125	0
k__Bacteria;p__Proteobacteria;c__Deltaproteobacteria;o__Bdellovibrionales;f__Bacteriovoracaceae;Other	0.004875	0.000333333	0.00166667	0.000666667	0	0	0	0
k__Bacteria;p__Proteobacteria;c__Deltaproteobacteria;o__Bdellovibrionales;f__Bacteriovoracaceae;g__	0	0	4.16667e-05	0	0	0	0	0
k__Bacteria;p__Proteobacteria;c__Deltaproteobacteria;o__Bdellovibrionales;f__Bacteriovoracaceae;g__Peredibacter	0	0	0.00854167	0	0	0	0	0
k__Bacteria;p__Proteobacteria;c__Deltaproteobacteria;o__Bdellovibrionales;f__Bdellovibrionaceae;g__Bdellovibrio	0	0	0	0	0.000375	0	0	0
k__Bacteria;p__Proteobacteria;c__Deltaproteobacteria;o__Desulfovibrionales;f__Desulfomicrobiaceae;g__Desulfomicrobium	4.16667e-05	0	4.16667e-05	0	4.16667e-05	0	0	0
k__Bacteria;p__Proteobacteria;c__Deltaproteobacteria;o__Desulfuromonadales;f__Geobacteraceae;g__Geobacter	4.16667e-05	4.16667e-05	0	0	0	0	0	0
k__Bacteria;p__Proteobacteria;c__Deltaproteobacteria;o__FAC87;f__;g__	0	0	0	0	8.33333e-05	0	0	0
k__Bacteria;p__Proteobacteria;c__Deltaproteobacteria;o__Myxococcales;f__Polyangiaceae;Other	0	0	0	0	0	0	0.000291667	0
k__Bacteria;p__Proteobacteria;c__Deltaproteobacteria;o__Spirobacillales;f__;g__	0	0	0	0	0	8.33333e-05	0	0
k__Bacteria;p__Proteobacteria;c__Deltaproteobacteria;o__Sva0853;f__SAR324;g__	0	0	0	0	4.16667e-05	0	0	0
k__Bacteria;p__Proteobacteria;c__Epsilonproteobacteria;o__Campylobacterales;f__Campylobacteraceae;g__Arcobacter	0.000291667	4.16667e-05	0.000208333	4.16667e-05	4.16667e-05	8.33333e-05	0	0
k__Bacteria;p__Proteobacteria;c__Epsilonproteobacteria;o__Campylobacterales;f__Helicobacteraceae;g__Sulfuricurvum	0	4.16667e-05	0	0	0	0	0	0
k__Bacteria;p__Proteobacteria;c__Gammaproteobacteria;Other;Other;Other	0	0	0	0	0	0	0.000333333	0
k__Bacteria;p__Proteobacteria;c__Gammaproteobacteria;o__Alteromonadales;f__Alteromonadaceae;Other	0	8.33333e-05	0	0	0	0	0	0
k__Bacteria;p__Proteobacteria;c__Gammaproteobacteria;o__Alteromonadales;f__Alteromonadaceae;g__Alteromonas	0.000166667	4.16667e-05	0	8.33333e-05	0	0.000125	0	0
k__Bacteria;p__Proteobacteria;c__Gammaproteobacteria;o__Alteromonadales;f__Alteromonadaceae;g__HTCC2207	0	0	0	4.16667e-05	0	0	0	0
k__Bacteria;p__Proteobacteria;c__Gammaproteobacteria;o__Alteromonadales;f__Idiomarinaceae;g__Idiomarina	4.16667e-05	0	0	0	0	0	0	0
k__Bacteria;p__Proteobacteria;c__Gammaproteobacteria;o__Alteromonadales;f__OM60;Other	4.16667e-05	0	0	4.16667e-05	0	0	0	0
k__Bacteria;p__Proteobacteria;c__Gammaproteobacteria;o__Alteromonadales;f__OM60;g__	0	0	0.000125	4.16667e-05	0	0	0	0
k__Bacteria;p__Proteobacteria;c__Gammaproteobacteria;o__Alteromonadales;f__Shewanellaceae;g__Shewanella	4.16667e-05	0	4.16667e-05	0	0	0	0	0
k__Bacteria;p__Proteobacteria;c__Gammaproteobacteria;o__Enterobacteriales;f__Enterobacteriaceae;Other	0	0	0	0	0	0.000208333	0	0
k__Bacteria;p__Proteobacteria;c__Gammaproteobacteria;o__HTCC2188;f__HTCC2089;g__	4.16667e-05	0	0	0	0	4.16667e-05	0	0
k__Bacteria;p__Proteobacteria;c__Gammaproteobacteria;o__Legionellales;f__Legionellaceae;Other	0	0	4.16667e-05	0	0	0	0	0
k__Bacteria;p__Proteobacteria;c__Gammaproteobacteria;o__Oceanospirillales;f__;g__	4.16667e-05	0	0	0	0	0	0	0
k__Bacteria;p__Proteobacteria;c__Gammaproteobacteria;o__Oceanospirillales;f__Halomonadaceae;g__Candidatus Portiera	0.000208333	8.33333e-05	0.000458333	0.000708333	0.000208333	0.000166667	0	0
k__Bacteria;p__Proteobacteria;c__Gammaproteobacteria;o__Oceanospirillales;f__Halomonadaceae;g__Halomonas	0.000208333	0	0.000166667	0	4.16667e-05	0	0	0
k__Bacteria;p__Proteobacteria;c__Gammaproteobacteria;o__Pasteurellales;f__Pasteurellaceae;Other	0	0	4.16667e-05	0	0.00258333	0	0	0
k__Bacteria;p__Proteobacteria;c__Gammaproteobacteria;o__Pasteurellales;f__Pasteurellaceae;g__Aggregatibacter	0	0	0	0	0	8.33333e-05	0	0
k__Bacteria;p__Proteobacteria;c__Gammaproteobacteria;o__Pseudomonadales;f__Moraxellaceae;g__Acinetobacter	0	0	4.16667e-05	0.000166667	0	0	0.000375	0
k__Bacteria;p__Proteobacteria;c__Gammaproteobacteria;o__Pseudomonadales;f__Moraxellaceae;g__Alkanindiges	0	0	0	0	0	0	0.000125	0
k__Bacteria;p__Proteobacteria;c__Gammaproteobacteria;o__Pseudomonadales;f__Moraxellaceae;g__Perlucidibaca	0	0	0	0.000541667	0	0	0	0
k__Bacteria;p__Proteobacteria;c__Gammaproteobacteria;o__Pseudomonadales;f__Moraxellaceae;g__Psychrobacter	0.000166667	0	0.00025	0.00333333	0	0	0	0
k__Bacteria;p__Proteobacteria;c__Gammaproteobacteria;o__Pseudomonadales;f__Pseudomonadaceae;Other	0.000166667	4.16667e-05	0.000125	0	4.16667e-05	0.000291667	0	0
k__Bacteria;p__Proteobacteria;c__Gammaproteobacteria;o__Pseudomonadales;f__Pseudomonadaceae;g__	4.16667e-05	4.16667e-05	8.33333e-05	0	0	0.000125	0	0
k__Bacteria;p__Proteobacteria;c__Gammaproteobacteria;o__Pseudomonadales;f__Pseudomonadaceae;g__Pseudomonas	0.000416667	4.16667e-05	0	0	0	0.000125	0	0
k__Bacteria;p__Proteobacteria;c__Gammaproteobacteria;o__Vibrionales;f__Vibrionaceae;Other	4.16667e-05	4.16667e-05	0.000125	0	0	4.16667e-05	0	0
k__Bacteria;p__Proteobacteria;c__Gammaproteobacteria;o__Vibrionales;f__Vibrionaceae;g__Photobacterium	0	4.16667e-05	0	0	0	4.16667e-05	0	0
k__Bacteria;p__Proteobacteria;c__Gammaproteobacteria;o__Vibrionales;f__Vibrionaceae;g__Vibrio	4.16667e-05	4.16667e-05	0	0	0.0005	0	0	0
k__Bacteria;p__Proteobacteria;c__Gammaproteobacteria;o__Xanthomonadales;f__Xanthomonadaceae;Other	4.16667e-05	0	4.16667e-05	4.16667e-05	0	0	0	0
k__Bacteria;p__Proteobacteria;c__Gammaproteobacteria;o__Xanthomonadales;f__Xanthomonadaceae;g__Lysobacter	0	0.000833333	0.000166667	0	0	0	0	0
k__Bacteria;p__SAR406;c__AB16;o__Arctic96B-7;f__A714017;g__ZA3312c	4.16667e-05	0	0	4.16667e-05	0	0	0	0
k__Bacteria;p__Spirochaetes;c__MVP-15;o__PL-11B10;f__;g__	0	0	0	0	0	4.16667e-05	0	0
k__Bacteria;p__Spirochaetes;c__Spirochaetes;o__Spirochaetales;f__Spirochaetaceae;g__Treponema	0	4.16667e-05	8.33333e-05	0.000125	0	0	0	0
k__Bacteria;p__TM7;c__SC3;o__;f__;g__	0	0.00025	0.000125	0	0	0	0	0
k__Bacteria;p__TM7;c__TM7-1;o__;f__;g__	0.000416667	0.000416667	4.16667e-05	0	0	0	0	0
k__Bacteria;p__TM7;c__TM7-3;Other;Other;Other	0.000625	0.00233333	4.16667e-05	0	0	0	0	0
k__Bacteria;p__TM7;c__TM7-3;o__EW055;f__;g__	0.000875	0.00245833	8.33333e-05	0	0	0	0.000291667	0
k__Bacteria;p__Tenericutes;c__Mollicutes;o__Mycoplasmatales;f__Mycoplasmataceae;g__Mycoplasma	0	0.000833333	0	0	0	0	0	0
k__Bacteria;p__Verrucomicrobia;c__Opitutae;o__Puniceicoccales;f__Puniceicoccaceae;g__Coraliomargarita	0	0	0	4.16667e-05	0	8.33333e-05	0	0
k__Bacteria;p__Verrucomicrobia;c__[Pedosphaerae];o__[Pedosphaerales];f__auto67_4W;g__	0	0	0	0	0	0	0.000208333	0
k__Bacteria;p__WS3;c__PRR-12;o__Sediment-1;f__PRR-10;g__	0	0	0	0	0	0	0.000416667	0
k__Bacteria;p__WWE1;c__[Cloacamonae];o__[Cloacamonales];f__[Cloacamonaceae];g__BHB21	8.33333e-05	0	0	0	0	4.16667e-05	0	0
k__Bacteria;p__[Thermi];c__Deinococci;o__Deinococcales;f__Deinococcaceae;g__Deinococcus	0	0	0	0	0	0.00104167	4.16667e-05	0
k__Bacteria;p__[Thermi];c__Deinococci;o__Deinococcales;f__Trueperaceae;g__	0	0	0	0	0	0	8.33333e-05	0
k__Bacteria;p__[Thermi];c__Deinococci;o__Deinococcales;f__Trueperaceae;g__Truepera	0	0	0	0	0	0	8.33333e-05	0

## Sheet: Table S3
Supplementary Table S3 Physical and chemical characteristics of ice samples from the Guliya ice cap
Parameter	1992 Plateau Shallow (PS) Ice Core					2015 Summit 3 (S3) Ice Core
	D13.3	D13.5	D24.1	D33.3	D34.4	D25#	D41*	D49*
Elevation (m)	6200	6200	6200	6200	6200	6710	6710	6710
Depth (m)	13.34–13.50	13.50–13.67	24.12–24.54	33.37–33.52	34.31–34.45	25.23–25.79	41.10–41.84	49.51–49.90
Age (year BP)$	~ 71	~ 72	~ 130	~ 285	~ 300	~ 355	~ 4400#	~ 14,400#
F- (ppb)	0.0001	3.455	5.277	5.417	1.121	1.0546	1.5488	19.4092
Cl- (ppb)	190	940	403	1191	311	800	829	2874
NO3- (ppb)	141	538	237	545	203	372	295	254
SO42- (ppb)	305	1110	495	838	218	1201	1382	6898
Na+ (ppb)	152	797	357	916	262	637	505	2277
NH4+ (ppb)	34	79	68	133	30	95	102	41
K+ (ppb)	21	79	66	86	49	48	48	165
Mg2+ (ppb)	54	199	217	154	233	81	114	481
Ca2+ (ppb)	1504	3496	3003	3142	2050	2064	2922	6033
Dust concentration (# particles >0.63 μm/ml)	352662	572118	1428448	610785	5511521	1098170	1935346	16839744
δ18O (‰)	−13.64	−13.57	−16.01	−15.85	−17.00	−14.43	−11.70#	−9.62#
#Unpublished data (L. G. Thompson, E, Mosley-Thompson et al., unpublished data); BP, before present (1950).
*Data from a previous publication [1], except where otherwise indicated.
$Methods for dating the ice: We analyzed ice samples from two ice cores drilled on the Guliya ice cap. One is a shallow core (PS, 34.5 m long) drilled in 1992 very close to a deep core (~308.6 m) drilled to bedrock the same year. The construction of the timescale for the 1992 deep ice core has been presented previously [2]. The time scale for the shallow (PS) core was extracted by matching its δ1…
References:
1. Zhong ZP, Solonenko NE, Gazitua MC, Kenny DV, Mosley-Thompson E, Rich VI, Van Etten JL, Thompson LG, Sullivan MB. Clean low-biomass procedures and their application to ancient ice core microorganisms. Front Microbiol. 2018; 9: 1094.
2. Thompson LG, Yao T, Davis ME, Henderson KA, Mosley-Thompson E, Lin PN, et al. Tropical climate instability: the last glacial cycle from a Qinghai-Tibetan ice core. Science. 1997;276:1821-5.
3. Seltzer AM, Buizert C, Baggenstos D, Brook EJ, Ahn J, Yang JW, Severinghaus JP. Does δ18O of O2 record meridional shifts in tropical rainfall? Clim Past. 2017;13:1323-38.

## Sheet: Table S4
Supplementary Table S4 Significance of each parameter's influence on the distribution of microbial communities by Mantel tests
Parameter	r value	p value
Elevation	0.66	0.01
Age	0.66447	0.02
Dust	0.75283	0.05
Fluoride	0.7321	0.11
Chloride	0.75195	0.05
Nitrate	-0.11633	0.71
Sulfate	0.81359	0.01
Sodium	0.7381	0.05
Ammonium	0.03346	0.85
Potassium	0.64783	0.11
Magnesium	0.66195	0.09
Calcium	0.62434	0.13

## Sheet: Table S5
Supplementary Table S5 General statistics for two viromes
Sample	Raw reads No.	QC reads No.	QC bases No.	Assembled contigs No.			Overall alignment rate to assembled contigs		Viral contig No. ≥10Kb (VirSorter Cat. 1, 2, 4, & 5)	Overall alignment rate to viral contigs ≥10Kb	vOTU No. (≥10kb)
				Contigs ≥1.5 kb	Contigs ≥5 kb	Contigs ≥10Kb	Contigs ≥1.5 kb	Contigs ≥10Kb	Contigs ≥10Kb	Contigs ≥10Kb	Length ≥5 kb
D25	62634741	57773183	5293260055	6060	1606	608	0.722	0.46	20	0.022	/
D49	96518821	82794664	7318970117	11167	2855	1241	0.424	0.271	23	0.006	/
Total	159153562	140567847	12612230172	17227	4461	1849	/	/	43	/	33

## Sheet: Table S6
Supplementary Table S6 Taxonomic assignments and viral cluster information of 33 glacier-ice vOTUs and 2,304 RefSeq genomes
Genome	Dataset origin	Order	Family	Genus	VC	VC Status	Size	VC Subcluster	VC Subcluster Size	Quality	Adj P-value	Topology Confidence Score	Genera in VC	Families in VC	Orders in VC	Genus Confidence Score
D25_103_30846	glacier ice	Unassigned	Unassigned	Unassigned		Outlier
D25_13_66736	glacier ice	Unassigned	Unassigned	Unassigned		Singleton
D25_14_65719	glacier ice	Caudovirales	Myoviridae	Unassigned	88_0	Clustered	3	VC_88_0	3	0.5427	0.993593	0.5393	1	2	2	1
D25_155_13915	glacier ice	Unassigned	Unassigned	Unassigned		Singleton
D25_167_23225	glacier ice	Unassigned	Unassigned	Unassigned		Singleton
D25_22_20338	glacier ice	Unassigned	Unassigned	Unassigned		Singleton
D25_4_93811	glacier ice	Unassigned	Unassigned	Unassigned		Outlier
D25_468_12041	glacier ice	Unassigned	Unassigned	Unassigned		Singleton
D25_52_40430	glacier ice	Unassigned	Unassigned	Unassigned		Outlier
D25_60_38549	glacier ice	Unassigned	Unassigned	Unassigned		Singleton
D25_67_37866	glacier ice	Unassigned	Unassigned	Unassigned		Outlier
D25_78_35271	glacier ice	Unassigned	Unassigned	Unassigned		Singleton
D25_81_34458	glacier ice	Unassigned	Unassigned	Unassigned		Outlier
D25_9_70857	glacier ice	Caudovirales	Siphoviridae	Unassigned	13_0	Clustered	3	VC_13_0	3	0.4461	0.998159	0.4453	1	2	2	1
D49_117_49836	glacier ice	Unassigned	Unassigned	Unassigned		Singleton
D49_130_45441	glacier ice	Unassigned	Unassigned	Unassigned		Outlier
D49_133_44515	glacier ice	Unassigned	Unassigned	Unassigned		Singleton
D49_150_41592	glacier ice	Unassigned	Unassigned	Unassigned		Outlier
D49_170_39214	glacier ice	Unassigned	Unassigned	Unassigned		Outlier
D49_215_34563	glacier ice	Unassigned	Unassigned	Unassigned		Outlier
D49_255_30828	glacier ice	Unassigned	Unassigned	Unassigned	232_0	Clustered	2	VC_232_0	2	0.0539	0.771872	0.0416	1	1	1	1
D49_318_25163	glacier ice	Unassigned	Unassigned	Unassigned		Outlier
D49_323_24828	glacier ice	Unassigned	Unassigned	Unassigned		Outlier
D49_333_24415	glacier ice	Unassigned	Unassigned	Unassigned		Singleton
D49_344_23890	glacier ice	Unassigned	Unassigned	Unassigned		Singleton
D49_405_21683	glacier ice	Caudovirales	Siphoviridae	Unassigned	251_0	Clustered	2	VC_251_0	2	0.1547	0.5	0.0774	1	2	2	1
D49_418_21421	glacier ice	Caudovirales	Siphoviridae	Cronusvirus	213_0	Clustered	2	VC_213_0	2	0.1567	0.904785	0.1418	2	2	2	1
D49_45_79914	glacier ice	Unassigned	Unassigned	Unassigned		Singleton
D49_491_18969	glacier ice	Unassigned	Unassigned	Unassigned	232_0	Clustered	2	VC_232_0	2	0.0539	0.771872	0.0416	1	1	1	1
D49_576_17121	glacier ice	Unassigned	Unassigned	Unassigned		Singleton
D49_69_66536	glacier ice	Unassigned	Unassigned	Unassigned		Overlap (VC_147/VC_163)
D49_742_14269	glacier ice	Unassigned	Unassigned	Unassigned		Overlap (VC_147/VC_163)
D49_912_12412	glacier ice	Unassigned	Unassigned	Unassigned		Outlier
Acholeplasma~phage~MV-L1	RefSeq-85	Unassigned	Inoviridae	Plectrovirus		Singleton
Acholeplasma~virus~L2	RefSeq-85	Unassigned	Plasmaviridae	Plasmavirus		Singleton
Achromobacter~phage~83-24	RefSeq-85	Caudovirales	Siphoviridae	Jwxvirus	0_0	Clustered	2	VC_0_0	2	0.2429	0.951153	0.2311	1	1	1	1
Achromobacter~phage~JWAlpha	RefSeq-85	Caudovirales	Podoviridae	Jwalphavirus	6_1	Clustered	10	VC_6_1	10	0.3866	1	0.3866	3	1	1	1
Achromobacter~phage~JWF	RefSeq-85	Caudovirales	Siphoviridae	Unassigned		Outlier
Achromobacter~phage~JWX	RefSeq-85	Caudovirales	Siphoviridae	Jwxvirus	0_0	Clustered	2	VC_0_0	2	0.2429	0.951153	0.2311	1	1	1	1
Achromobacter~phage~phiAxp-1	RefSeq-85	Caudovirales	Siphoviridae	Unassigned		Outlier
Achromobacter~phage~phiAxp-2	RefSeq-85	Caudovirales	Siphoviridae	Unassigned		Outlier
Achromobacter~phage~phiAxp-3	RefSeq-85	Caudovirales	Podoviridae	Jwalphavirus	6_1	Clustered	10	VC_6_1	10	0.3866	1	0.3866	3	1	1	1
Acidianus~bottle-shaped~virus	RefSeq-85	Unassigned	Ampullaviridae	Ampullavirus	17_0	Clustered	3	VC_17_0	3	1	1	1	2	1	1	1
Acidianus~bottle-shaped~virus~2	RefSeq-85	Unassigned	Ampullaviridae	Unassigned	17_0	Clustered	3	VC_17_0	3	1	1	1	2	1	1	1
Acidianus~bottle-shaped~virus~3	RefSeq-85	Unassigned	Ampullaviridae	Unassigned	17_0	Clustered	3	VC_17_0	3	1	1	1	2	1	1	1
Acidianus~filamentous~virus~1	RefSeq-85	Ligamenvirales	Lipothrixviridae	Gammalipothrixvirus		Outlier
Acidianus~filamentous~virus~2	RefSeq-85	Ligamenvirales	Lipothrixviridae	Deltalipothrixvirus		Outlier
Acidianus~filamentous~virus~3	RefSeq-85	Ligamenvirales	Lipothrixviridae	Betalipothrixvirus	19_0	Clustered	6	VC_19_0	6	0.9538	0.999939	0.9537	1	1	1	1
Acidianus~filamentous~virus~6	RefSeq-85	Ligamenvirales	Lipothrixviridae	Betalipothrixvirus	19_0	Clustered	6	VC_19_0	6	0.9538	0.999939	0.9537	1	1	1	1
Acidianus~filamentous~virus~7	RefSeq-85	Ligamenvirales	Lipothrixviridae	Betalipothrixvirus	19_0	Clustered	6	VC_19_0	6	0.9538	0.999939	0.9537	1	1	1	1
Acidianus~filamentous~virus~8	RefSeq-85	Ligamenvirales	Lipothrixviridae	Betalipothrixvirus	19_0	Clustered	6	VC_19_0	6	0.9538	0.999939	0.9537	1	1	1	1
Acidianus~filamentous~virus~9	RefSeq-85	Ligamenvirales	Lipothrixviridae	Betalipothrixvirus	19_0	Clustered	6	VC_19_0	6	0.9538	0.999939	0.9537	1	1	1	1
Acidianus~rod-shaped~virus~1	RefSeq-85	Ligamenvirales	Rudiviridae	Rudivirus		Outlier
Acidianus~rod-shaped~virus~2	RefSeq-85	Ligamenvirales	Rudiviridae	Unassigned		Outlier
Acidianus~spindle-shaped~virus~1	RefSeq-85	Unassigned	Fuselloviridae	Betafusellovirus	21_0	Clustered	9	VC_21_0	9	0.8951	1	0.8951	2	1	1	1
Acidianus~tailed~spindle~virus	RefSeq-85	Unassigned	Bicaudaviridae	Unassigned		Outlier
Acidianus~two-tailed~virus	RefSeq-85	Unassigned	Bicaudaviridae	Bicaudavirus		Outlier
Acinetobacter~bacteriophage~AP22	RefSeq-85	Caudovirales	Myoviridae	Ap22virus	24_0	Clustered	4	VC_24_0	4	0.7364	0.99969	0.7362	2	2	2	1
Acinetobacter~phage~AB3	RefSeq-85	Caudovirales	Podoviridae	Fri1virus	26_0	Clustered	10	VC_26_0	10	0.3432	1	0.3432	2	2	2	1
Acinetobacter~phage~Abp1	RefSeq-85	Caudovirales	Podoviridae	Fri1virus	26_0	Clustered	10	VC_26_0	10	0.3432	1	0.3432	2	2	2	1
Acinetobacter~phage~Ac42	RefSeq-85	Caudovirales	Myoviridae	Unassigned	35_18	Clustered	2	VC_35_18	2	0.0078	0.957178	0.0075	1	1	1	1
Acinetobacter~phage~Acj61	RefSeq-85	Caudovirales	Myoviridae	Unassigned	35_19	Clustered	3	VC_35_19	3	0.016	0.998575	0.016	1	1	1	1
Acinetobacter~phage~Acj9	RefSeq-85	Caudovirales	Myoviridae	Unassigned	35_19	Clustered	3	VC_35_19	3	0.016	0.998575	0.016	1	1	1	1
Acinetobacter~phage~AP205	RefSeq-85	Unassigned	Leviviridae	Unassigned		Outlier
Acinetobacter~phage~Bphi-B1251	RefSeq-85	Caudovirales	Podoviridae	Unassigned	48_0	Clustered	2	VC_48_0	2	0.1605	0.951902	0.1527	1	2	2	1
Acinetobacter~phage~Fri1	RefSeq-85	Caudovirales	Podoviridae	Fri1virus	26_0	Clustered	10	VC_26_0	10	0.3432	1	0.3432	2	2	2	1
Acinetobacter~phage~IME_AB3	RefSeq-85	Caudovirales	Siphoviridae	Unassigned		Outlier
Acinetobacter~phage~LZ35	RefSeq-85	Unassigned	Unassigned	Unassigned	24_0	Clustered	4	VC_24_0	4	0.7364	0.99969	0.7362	2	2	2	1
Acinetobacter~phage~Petty	RefSeq-85	Caudovirales	Podoviridae	Unassigned	26_0	Clustered	10	VC_26_0	10	0.3432	1	0.3432	2	2	2	1
Acinetobacter~phage~phiAB1	RefSeq-85	Caudovirales	Podoviridae	Fri1virus	26_0	Clustered	10	VC_26_0	10	0.3432	1	0.3432	2	2	2	1
Acinetobacter~phage~phiAB6	RefSeq-85	Unassigned	Unassigned	Unassigned	26_0	Clustered	10	VC_26_0	10	0.3432	1	0.3432	2	2	2	1
Acinetobacter~phage~phiAC-1	RefSeq-85	Caudovirales	Myoviridae	Unassigned		Outlier
Acinetobacter~phage~Presley	RefSeq-85	Caudovirales	Podoviridae	Unassigned		Outlier
Acinetobacter~phage~vB_AbaM_Acibel004	RefSeq-85	Caudovirales	Myoviridae	Unassigned	44_0	Clustered	2	VC_44_0	2	0.1332	0.955501	0.1272	1	2	2	1
Acinetobacter~phage~vB_AbaM_IME200	RefSeq-85	Caudovirales	Podoviridae	Fri1virus	26_0	Clustered	10	VC_26_0	10	0.3432	1	0.3432	2	2	2	1
Acinetobacter~phage~vB_AbaM_phiAbaA1	RefSeq-85	Unassigned	Unassigned	Unassigned	44_0	Clustered	2	VC_44_0	2	0.1332	0.955501	0.1272	1	2	2	1
Acinetobacter~phage~vB_AbaP_Acibel007	RefSeq-85	Caudovirales	Podoviridae	Unassigned	26_0	Clustered	10	VC_26_0	10	0.3432	1	0.3432	2	2	2	1
Acinetobacter~phage~vB_AbaP_PD-6A3	RefSeq-85	Caudovirales	Podoviridae	Fri1virus	26_0	Clustered	10	VC_26_0	10	0.3432	1	0.3432	2	2	2	1
Acinetobacter~phage~vB_AbaP_PD-AB9	RefSeq-85	Caudovirales	Podoviridae	Fri1virus	26_0	Clustered	10	VC_26_0	10	0.3432	1	0.3432	2	2	2	1
Acinetobacter~phage~vB_AbaS_TRS1	RefSeq-85	Unassigned	Unassigned	Unassigned	48_0	Clustered	2	VC_48_0	2	0.1605	0.951902	0.1527	1	2	2	1
Acinetobacter~phage~YMC11/12/R2315	RefSeq-85	Caudovirales	Myoviridae	Unassigned	24_0	Clustered	4	VC_24_0	4	0.7364	0.99969	0.7362	2	2	2	1
Acinetobacter~phage~YMC13/03/R2096	RefSeq-85	Caudovirales	Myoviridae	Unassigned		Outlier
Acinetobacter~phage~YMC-13-01-C62	RefSeq-85	Caudovirales	Myoviridae	Ap22virus	24_0	Clustered	4	VC_24_0	4	0.7364	0.99969	0.7362	2	2	2	1
Acinetobacter~phage~ZZ1	RefSeq-85	Caudovirales	Myoviridae	Unassigned	35_19	Clustered	3	VC_35_19	3	0.016	0.998575	0.016	1	1	1	1
Acinetobacter~virus~133	RefSeq-85	Caudovirales	Myoviridae	Unassigned	35_18	Clustered	2	VC_35_18	2	0.0078	0.957178	0.0075	1	1	1	1
Actinomyces~virus~Av1	RefSeq-85	Caudovirales	Podoviridae	Unassigned		Outlier
Actinoplanes~phage~phiAsp2	RefSeq-85	Caudovirales	Siphoviridae	Unassigned		Outlier
Aeromonas~phage~Aes012	RefSeq-85	Caudovirales	Myoviridae	Secunda5virus	35_16	Clustered	5	VC_35_16	5	0.0343	1	0.0343	1	1	1	0.9
Aeromonas~phage~Aes508	RefSeq-85	Caudovirales	Myoviridae	Secunda5virus	35_16	Clustered	5	VC_35_16	5	0.0343	1	0.0343	1	1	1	0.9
Aeromonas~phage~CC2	RefSeq-85	Caudovirales	Myoviridae	Unassigned		Outlier
Aeromonas~phage~pAh6-C	RefSeq-85	Caudovirales	Myoviridae	Unassigned	53_0	Clustered	5	VC_53_0	5	0.9799	0.999938	0.9798	1	1	1	1
Aeromonas~phage~phiAS4	RefSeq-85	Caudovirales	Myoviridae	Secunda5virus	35_16	Clustered	5	VC_35_16	5	0.0343	1	0.0343	1	1	1	0.9
Aeromonas~phage~phiAS5	RefSeq-85	Caudovirales	Myoviridae	Unassigned		Outlier
Aeromonas~phage~phiAS7	RefSeq-85	Caudovirales	Podoviridae	Unassigned	27_0	Clustered	5	VC_27_0	5	0.2231	1	0.2231	1	1	1	1
Aeromonas~phage~PX29	RefSeq-85	Caudovirales	Myoviridae	Unassigned		Outlier
Aeromonas~phage~vB_AsaM-56	RefSeq-85	Caudovirales	Myoviridae	Unassigned		Outlier
Aeromonas~virus~25	RefSeq-85	Caudovirales	Myoviridae	Secunda5virus	35_16	Clustered	5	VC_35_16	5	0.0343	1	0.0343	1	1	1	0.9
Aeromonas~virus~31	RefSeq-85	Caudovirales	Myoviridae	Secunda5virus	35_15	Clustered	2	VC_35_15	2	0.0085	0.953469	0.0081	2	1	1	1
Aeromonas~virus~44RR2	RefSeq-85	Caudovirales	Myoviridae	Biquartavirus	35_15	Clustered	2	VC_35_15	2	0.0085	0.953469	0.0081	2	1	1	1
Aeromonas~virus~65	RefSeq-85	Caudovirales	Myoviridae	Unassigned		Outlier
Aeromonas~virus~Aeh1	RefSeq-85	Caudovirales	Myoviridae	Unassigned		Outlier
Aeromonas~virus~phiO18P	RefSeq-85	Caudovirales	Myoviridae	Hp1virus	70_0	Clustered	7	VC_70_0	7	0.5714	1	0.5714	2	2	2	1
Aeropyrum~pernix~ovoid~virus~1	RefSeq-85	Unassigned	Guttaviridae	Betaguttavirus		Singleton
Aeropyrum~pernix~spindle-shaped~virus~1	RefSeq-85	Unassigned	Unassigned	Unassigned		Singleton
Aggregatibacter~phage~S1249	RefSeq-85	Unassigned	Unassigned	Unassigned	4_0	Clustered	2	VC_4_0	2	0.4605	0.946883	0.436	1	2	2	1
Agrobacterium~phage~7-7-1	RefSeq-85	Caudovirales	Myoviridae	Unassigned		Outlier
Alteromonas~phage~vB_AmaP_AD45-P1	RefSeq-85	Caudovirales	Podoviridae	Unassigned		Outlier
Anabaena~phage~A-4L	RefSeq-85	Caudovirales	Podoviridae	Unassigned		Outlier
Archaeal~BJ1~virus	RefSeq-85	Caudovirales	Siphoviridae	Unassigned	79_0	Clustered	2	VC_79_0	2	0.7941	0.814453	0.6468	1	2	2	1
Arthrobacter~phage~BarretLemon	RefSeq-85	Caudovirales	Myoviridae	Chippewavirus	80_0	Clustered	2	VC_80_0	2	0.9028	0.5	0.4514	2	1	1	1
Arthrobacter~phage~Decurro	RefSeq-85	Caudovirales	Siphoviridae	Decurrovirus		Outlier
Arthrobacter~phage~KellEzio	RefSeq-85	Caudovirales	Siphoviridae	Kelleziovirus	82_0	Clustered	2	VC_82_0	2	1	1	1	1	1	1	1
Arthrobacter~phage~Kitkat	RefSeq-85	Caudovirales	Siphoviridae	Kelleziovirus	82_0	Clustered	2	VC_82_0	2	1	1	1	1	1	1	1
Arthrobacter~phage~Mudcat	RefSeq-85	Caudovirales	Siphoviridae	Mudcatvirus		Outlier
Arthrobacter~phage~vB_ArS-ArV2	RefSeq-85	Caudovirales	Siphoviridae	Unassigned		Outlier
Arthrobacter~phage~vB_ArtM-ArV1	RefSeq-85	Caudovirales	Myoviridae	Arvunavirus	80_0	Clustered	2	VC_80_0	2	0.9028	0.5	0.4514	2	1	1	1
Aurantimonas~phage~AmM-1	RefSeq-85	Caudovirales	Unassigned	Unassigned		Outlier
Azospirillum~phage~Cd	RefSeq-85	Caudovirales	Siphoviridae	Unassigned		Outlier
Bacillus~phage~Aurora	RefSeq-85	Unassigned	Unassigned	Unassigned	62_0	Clustered	4	VC_62_0	4	0.6214	0.99994	0.6214	1	2	2	1
Bacillus~phage~AvesoBmore	RefSeq-85	Caudovirales	Myoviridae	B4virus	98_1	Clustered	5	VC_98_1	5	0.0723	1	0.0723	2	2	2	1
Bacillus~phage~B4	RefSeq-85	Caudovirales	Myoviridae	B4virus	98_2	Clustered	2	VC_98_2	2	0.0174	0.946535	0.0165	1	1	1	1
Bacillus~phage~BalMu-1	RefSeq-85	Unassigned	Unassigned	Unassigned		Outlier
Bacillus~phage~Bam35c	RefSeq-85	Unassigned	Tectiviridae	Betatectivirus	128_0	Clustered	4	VC_128_0	4	1	1	1	1	1	1	1
Bacillus~phage~Bastille	RefSeq-85	Caudovirales	Myoviridae	Bastillevirus	98_10	Clustered	4	VC_98_10	4	0.0528	0.999987	0.0528	1	1	1	1
Bacillus~phage~BCD7	RefSeq-85	Caudovirales	Myoviridae	Unassigned		Outlier
Bacillus~phage~BCJA1c	RefSeq-85	Caudovirales	Siphoviridae	Unassigned		Outlier
Bacillus~phage~Bcp1	RefSeq-85	Caudovirales	Myoviridae	Bc431virus	98_4	Clustered	5	VC_98_4	5	0.0767	1	0.0767	1	1	1	0.8
Bacillus~phage~BCP78	RefSeq-85	Caudovirales	Myoviridae	Tsarbombavirus	98_3	Clustered	2	VC_98_3	2	0.0189	0.956579	0.018	1	1	1	1
Bacillus~phage~BCP8-2	RefSeq-85	Caudovirales	Myoviridae	Bc431virus	98_4	Clustered	5	VC_98_4	5	0.0767	1	0.0767	1	1	1	0.8
Bacillus~phage~Belinda	RefSeq-85	Unassigned	Unassigned	Unassigned	98_0	Clustered	16	VC_98_0	16	0.3234	1	0.3234	2	2	2	0.825
Bacillus~phage~BigBertha	RefSeq-85	Caudovirales	Myoviridae	B4virus	98_1	Clustered	5	VC_98_1	5	0.0723	1	0.0723	2	2	2	1
Bacillus~phage~BM5	RefSeq-85	Caudovirales	Myoviridae	Unassigned		Outlier
Bacillus~phage~Bobb	RefSeq-85	Caudovirales	Myoviridae	Agatevirus	98_5	Clustered	3	VC_98_5	3	0.0437	0.998528	0.0437	1	1	1	1
Bacillus~phage~Bp8p-C	RefSeq-85	Caudovirales	Myoviridae	Agatevirus	98_5	Clustered	3	VC_98_5	3	0.0437	0.998528	0.0437	1	1	1	1
Bacillus~phage~BPS10C	RefSeq-85	Caudovirales	Myoviridae	Unassigned	98_0	Clustered	16	VC_98_0	16	0.3234	1	0.3234	2	2	2	0.825
Bacillus~phage~BPS13	RefSeq-85	Caudovirales	Myoviridae	Wphvirus	98_0	Clustered	16	VC_98_0	16	0.3234	1	0.3234	2	2	2	0.825
Bacillus~phage~BtCS33	RefSeq-85	Caudovirales	Siphoviridae	Unassigned	113_0	Clustered	6	VC_113_0	6	0.4806	1	0.4806	2	1	1	1
Bacillus~phage~CAM003	RefSeq-85	Caudovirales	Myoviridae	Bastillevirus	98_10	Clustered	4	VC_98_10	4	0.0528	0.999987	0.0528	1	1	1	1
Bacillus~phage~CampHawk	RefSeq-85	Caudovirales	Myoviridae	Spo1virus	95_0	Clustered	2	VC_95_0	2	0.0631	0.956526	0.0604	1	1	1	1
Bacillus~phage~Claudi	RefSeq-85	Unassigned	Unassigned	Unassigned	62_0	Clustered	4	VC_62_0	4	0.6214	0.99994	0.6214	1	2	2	1
Bacillus~phage~CP-51	RefSeq-85	Caudovirales	Myoviridae	Cp51virus		Overlap (VC_96/VC_100)
Bacillus~phage~Deep~Blue	RefSeq-85	Caudovirales	Myoviridae	Bc431virus	98_4	Clustered	5	VC_98_4	5	0.0767	1	0.0767	1	1	1	0.8
Bacillus~phage~DIGNKC	RefSeq-85	Unassigned	Unassigned	Unassigned	98_0	Clustered	16	VC_98_0	16	0.3234	1	0.3234	2	2	2	0.825
Bacillus~phage~DirtyBetty	RefSeq-85	Unassigned	Unassigned	Unassigned	98_0	Clustered	16	VC_98_0	16	0.3234	1	0.3234	2	2	2	0.825
Bacillus~phage~Eldridge	RefSeq-85	Unassigned	Unassigned	Unassigned	98_7	Clustered	2	VC_98_7	2	0.0213	0.956629	0.0204	1	2	2	1
Bacillus~phage~Evoli	RefSeq-85	Caudovirales	Myoviridae	Bastillevirus	98_10	Clustered	4	VC_98_10	4	0.0528	0.999987	0.0528	1	1	1	1
Bacillus~phage~Eyuki	RefSeq-85	Caudovirales	Myoviridae	Wphvirus	98_0	Clustered	16	VC_98_0	16	0.3234	1	0.3234	2	2	2	0.825
Bacillus~phage~Fah	RefSeq-85	Caudovirales	Siphoviridae	Unassigned	113_0	Clustered	6	VC_113_0	6	0.4806	1	0.4806	2	1	1	1
Bacillus~phage~Gamma	RefSeq-85	Caudovirales	Siphoviridae	Unassigned	113_0	Clustered	6	VC_113_0	6	0.4806	1	0.4806	2	1	1	1
Bacillus~phage~GIL16c	RefSeq-85	Unassigned	Tectiviridae	Betatectivirus	128_0	Clustered	4	VC_128_0	4	1	1	1	1	1	1	1
Bacillus~phage~Grass	RefSeq-85	Caudovirales	Myoviridae	Nit1virus	98_6	Clustered	2	VC_98_6	2	0.022	0.956609	0.021	1	1	1	1
Bacillus~phage~Hakuna	RefSeq-85	Caudovirales	Myoviridae	Wphvirus	98_0	Clustered	16	VC_98_0	16	0.3234	1	0.3234	2	2	2	0.825
Bacillus~phage~Hoody~T	RefSeq-85	Caudovirales	Myoviridae	Bastillevirus	98_10	Clustered	4	VC_98_10	4	0.0528	0.999987	0.0528	1	1	1	1
Bacillus~phage~JBP901	RefSeq-85	Caudovirales	Myoviridae	Bc431virus	98_4	Clustered	5	VC_98_4	5	0.0767	1	0.0767	1	1	1	0.8
Bacillus~phage~JL	RefSeq-85	Caudovirales	Myoviridae	Cp51virus		Overlap (VC_96/VC_100)
Bacillus~phage~Kida	RefSeq-85	Unassigned	Unassigned	Unassigned	98_0	Clustered	16	VC_98_0	16	0.3234	1	0.3234	2	2	2	0.825
Bacillus~phage~Megatron	RefSeq-85	Caudovirales	Myoviridae	Wphvirus	98_0	Clustered	16	VC_98_0	16	0.3234	1	0.3234	2	2	2	0.825
Bacillus~phage~MG-B1	RefSeq-85	Caudovirales	Podoviridae	Unassigned	62_0	Clustered	4	VC_62_0	4	0.6214	0.99994	0.6214	1	2	2	1
Bacillus~phage~Moonbeam	RefSeq-85	Caudovirales	Myoviridae	Unassigned	98_7	Clustered	2	VC_98_7	2	0.0213	0.956629	0.0204	1	2	2	1
Bacillus~phage~Nemo	RefSeq-85	Unassigned	Unassigned	Unassigned	98_0	Clustered	16	VC_98_0	16	0.3234	1	0.3234	2	2	2	0.825
Bacillus~phage~Nigalana	RefSeq-85	Unassigned	Unassigned	Unassigned	98_0	Clustered	16	VC_98_0	16	0.3234	1	0.3234	2	2	2	0.825
Bacillus~phage~NotTheCreek	RefSeq-85	Unassigned	Unassigned	Unassigned	98_0	Clustered	16	VC_98_0	16	0.3234	1	0.3234	2	2	2	0.825
Bacillus~phage~Page	RefSeq-85	Caudovirales	Podoviridae	Pagevirus	114_0	Clustered	6	VC_114_0	6	0.8228	1	0.8228	2	1	1	1
Bacillus~phage~Palmer	RefSeq-85	Caudovirales	Podoviridae	Pagevirus	114_0	Clustered	6	VC_114_0	6	0.8228	1	0.8228	2	1	1	1
Bacillus~phage~Pascal	RefSeq-85	Caudovirales	Podoviridae	Pagevirus	114_0	Clustered	6	VC_114_0	6	0.8228	1	0.8228	2	1	1	1
Bacillus~phage~Pavlov	RefSeq-85	Caudovirales	Podoviridae	Unassigned	114_0	Clustered	6	VC_114_0	6	0.8228	1	0.8228	2	1	1	1
Bacillus~phage~PBC1	RefSeq-85	Caudovirales	Siphoviridae	Unassigned		Outlier
Bacillus~phage~PfEFR-5	RefSeq-85	Unassigned	Unassigned	Unassigned		Outlier
Bacillus~phage~phBC6A51	RefSeq-85	Caudovirales	Podoviridae	Unassigned		Outlier
Bacillus~phage~phBC6A52	RefSeq-85	Caudovirales	Podoviridae	Unassigned		Outlier
Bacillus~phage~phi105	RefSeq-85	Caudovirales	Siphoviridae	Unassigned		Outlier
Bacillus~phage~phi4B1	RefSeq-85	Caudovirales	Siphoviridae	Unassigned		Outlier
Bacillus~phage~phi4J1	RefSeq-85	Caudovirales	Siphoviridae	Unassigned		Overlap (VC_114/VC_130)
Bacillus~phage~phiAGATE	RefSeq-85	Caudovirales	Myoviridae	Agatevirus	98_5	Clustered	3	VC_98_5	3	0.0437	0.998528	0.0437	1	1	1	1
Bacillus~phage~phiCM3	RefSeq-85	Caudovirales	Siphoviridae	Unassigned	113_0	Clustered	6	VC_113_0	6	0.4806	1	0.4806	2	1	1	1
Bacillus~phage~phiNIT1	RefSeq-85	Caudovirales	Myoviridae	Nit1virus	98_6	Clustered	2	VC_98_6	2	0.022	0.956609	0.021	1	1	1	1
Bacillus~phage~phIS3501	RefSeq-85	Caudovirales	Siphoviridae	Unassigned	113_0	Clustered	6	VC_113_0	6	0.4806	1	0.4806	2	1	1	1
Bacillus~phage~Phrodo	RefSeq-85	Unassigned	Unassigned	Unassigned	98_1	Clustered	5	VC_98_1	5	0.0723	1	0.0723	2	2	2	1
Bacillus~phage~PM1	RefSeq-85	Caudovirales	Siphoviridae	Unassigned		Outlier
Bacillus~phage~Pony	RefSeq-85	Caudovirales	Podoviridae	Pagevirus	114_0	Clustered	6	VC_114_0	6	0.8228	1	0.8228	2	1	1	1
Bacillus~phage~Pookie	RefSeq-85	Caudovirales	Podoviridae	Pagevirus	114_0	Clustered	6	VC_114_0	6	0.8228	1	0.8228	2	1	1	1
Bacillus~phage~Riley	RefSeq-85	Caudovirales	Myoviridae	B4virus	98_1	Clustered	5	VC_98_1	5	0.0723	1	0.0723	2	2	2	1
Bacillus~phage~SageFayge	RefSeq-85	Unassigned	Unassigned	Unassigned	98_0	Clustered	16	VC_98_0	16	0.3234	1	0.3234	2	2	2	0.825
Bacillus~phage~SalinJah	RefSeq-85	Unassigned	Unassigned	Unassigned	98_0	Clustered	16	VC_98_0	16	0.3234	1	0.3234	2	2	2	0.825
Bacillus~phage~Shanette	RefSeq-85	Caudovirales	Myoviridae	Cp51virus		Overlap (VC_96/VC_100)
Bacillus~phage~Slash	RefSeq-85	Caudovirales	Siphoviridae	Slashvirus	133_0	Clustered	4	VC_133_0	4	0.9885	0.999105	0.9876	1	1	1	1
Bacillus~phage~SP-10	RefSeq-85	Caudovirales	Myoviridae	Unassigned		Outlier
Bacillus~phage~SPG24	RefSeq-85	Caudovirales	Myoviridae	Nit1virus		Outlier
Bacillus~phage~Spock	RefSeq-85	Caudovirales	Myoviridae	B4virus	98_2	Clustered	2	VC_98_2	2	0.0174	0.946535	0.0165	1	1	1	1
Bacillus~phage~SPP1	RefSeq-85	Caudovirales	Siphoviridae	Unassigned	120_0	Clustered	2	VC_120_0	2	0.0942	0.952603	0.0898	1	1	1	1
Bacillus~phage~Stahl	RefSeq-85	Caudovirales	Siphoviridae	Slashvirus	133_0	Clustered	4	VC_133_0	4	0.9885	0.999105	0.9876	1	1	1	1
Bacillus~phage~Staley	RefSeq-85	Caudovirales	Siphoviridae	Slashvirus	133_0	Clustered	4	VC_133_0	4	0.9885	0.999105	0.9876	1	1	1	1
Bacillus~phage~Stills	RefSeq-85	Caudovirales	Siphoviridae	Slashvirus	133_0	Clustered	4	VC_133_0	4	0.9885	0.999105	0.9876	1	1	1	1
Bacillus~phage~Stitch	RefSeq-85	Unassigned	Unassigned	Unassigned	62_0	Clustered	4	VC_62_0	4	0.6214	0.99994	0.6214	1	2	2	1
Bacillus~phage~TP21-L	RefSeq-85	Caudovirales	Siphoviridae	Tp21virus	131_0	Clustered	2	VC_131_0	2	0.4714	0.950796	0.4482	1	1	1	1
Bacillus~phage~Troll	RefSeq-85	Caudovirales	Myoviridae	B4virus	98_1	Clustered	5	VC_98_1	5	0.0723	1	0.0723	2	2	2	1
Bacillus~phage~TsarBomba	RefSeq-85	Caudovirales	Myoviridae	Tsarbombavirus	98_3	Clustered	2	VC_98_3	2	0.0189	0.956579	0.018	1	1	1	1
Bacillus~phage~vB_BceM_Bc431v3	RefSeq-85	Caudovirales	Myoviridae	Bc431virus	98_4	Clustered	5	VC_98_4	5	0.0767	1	0.0767	1	1	1	0.8
Bacillus~phage~vB_BhaS-171	RefSeq-85	Unassigned	Unassigned	Unassigned		Outlier
Bacillus~phage~vB_BtS_BMBtp3	RefSeq-85	Caudovirales	Siphoviridae	Unassigned		Overlap (VC_114/VC_130)
Bacillus~phage~VMY22	RefSeq-85	Caudovirales	Podoviridae	Unassigned	63_0	Clustered	4	VC_63_0	4	0.3447	0.9998	0.3447	2	1	1	1
Bacillus~phage~W.Ph.	RefSeq-85	Caudovirales	Myoviridae	Wphvirus	98_0	Clustered	16	VC_98_0	16	0.3234	1	0.3234	2	2	2	0.825
Bacillus~phage~Waukesha92	RefSeq-85	Caudovirales	Siphoviridae	Unassigned		Overlap (VC_114/VC_130)
Bacillus~phage~Wip1	RefSeq-85	Unassigned	Tectiviridae	Betatectivirus	128_0	Clustered	4	VC_128_0	4	1	1	1	1	1	1	1
Bacillus~phage~Zuko	RefSeq-85	Unassigned	Unassigned	Unassigned	98_0	Clustered	16	VC_98_0	16	0.3234	1	0.3234	2	2	2	0.825
Bacillus~virus~1	RefSeq-85	Caudovirales	Myoviridae	Svunavirus	117_0	Clustered	2	VC_117_0	2	0.271	0.952556	0.2582	1	1	1	1
Bacillus~virus~250	RefSeq-85	Caudovirales	Siphoviridae	Cecivirus	105_0	Clustered	2	VC_105_0	2	0.3234	0.948248	0.3067	1	1	1	1
Bacillus~virus~Andromeda	RefSeq-85	Caudovirales	Siphoviridae	Andromedavirus	147_0	Clustered	7	VC_147_0	7	1	1	1	1	1	1	1
Bacillus~virus~AP50	RefSeq-85	Unassigned	Tectiviridae	Betatectivirus	128_0	Clustered	4	VC_128_0	4	1	1	1	1	1	1	1
Bacillus~virus~B103	RefSeq-85	Caudovirales	Podoviridae	Phi29virus	63_0	Clustered	4	VC_63_0	4	0.3447	0.9998	0.3447	2	1	1	1
Bacillus~virus~Blastoid	RefSeq-85	Caudovirales	Siphoviridae	Andromedavirus	147_0	Clustered	7	VC_147_0	7	1	1	1	1	1	1	1
Bacillus~virus~BMBtp2	RefSeq-85	Caudovirales	Siphoviridae	Tp21virus	131_0	Clustered	2	VC_131_0	2	0.4714	0.950796	0.4482	1	1	1	1
Bacillus~virus~Curly	RefSeq-85	Caudovirales	Siphoviridae	Andromedavirus	147_0	Clustered	7	VC_147_0	7	1	1	1	1	1	1	1
Bacillus~virus~Eoghan	RefSeq-85	Caudovirales	Siphoviridae	Andromedavirus	147_0	Clustered	7	VC_147_0	7	1	1	1	1	1	1	1
Bacillus~virus~Finn	RefSeq-85	Caudovirales	Siphoviridae	Andromedavirus	147_0	Clustered	7	VC_147_0	7	1	1	1	1	1	1	1
Bacillus~virus~GA1	RefSeq-85	Caudovirales	Podoviridae	Phi29virus	63_0	Clustered	4	VC_63_0	4	0.3447	0.9998	0.3447	2	1	1	1
Bacillus~virus~Glittering	RefSeq-85	Caudovirales	Siphoviridae	Andromedavirus	147_0	Clustered	7	VC_147_0	7	1	1	1	1	1	1	1
Bacillus~virus~IEBH	RefSeq-85	Caudovirales	Siphoviridae	Cecivirus	105_0	Clustered	2	VC_105_0	2	0.3234	0.948248	0.3067	1	1	1	1
Bacillus~virus~phi29	RefSeq-85	Caudovirales	Podoviridae	Phi29virus	63_0	Clustered	4	VC_63_0	4	0.3447	0.9998	0.3447	2	1	1	1
Bacillus~virus~Riggi	RefSeq-85	Caudovirales	Siphoviridae	Andromedavirus	147_0	Clustered	7	VC_147_0	7	1	1	1	1	1	1	1
Bacillus~virus~SPO1	RefSeq-85	Caudovirales	Myoviridae	Spo1virus	95_0	Clustered	2	VC_95_0	2	0.0631	0.956526	0.0604	1	1	1	1
Bacillus~virus~Wbeta	RefSeq-85	Caudovirales	Siphoviridae	Wbetavirus	113_0	Clustered	6	VC_113_0	6	0.4806	1	0.4806	2	1	1	1
Bacteriophage~APSE-2	RefSeq-85	Caudovirales	Podoviridae	Unassigned	149_0	Clustered	2	VC_149_0	2	0.1372	0.953172	0.1308	1	1	1	1
Bacteriophage~Lily	RefSeq-85	Caudovirales	Siphoviridae	Unassigned		Outlier
Bacteroides~phage~B124-14	RefSeq-85	Caudovirales	Siphoviridae	Unassigned	135_0	Clustered	2	VC_135_0	2	0.4943	0.945328	0.4673	1	1	1	1
Bacteroides~phage~B40-8	RefSeq-85	Caudovirales	Siphoviridae	Unassigned	135_0	Clustered	2	VC_135_0	2	0.4943	0.945328	0.4673	1	1	1	1
Bdellovibrio~phage~phi1402	RefSeq-85	Caudovirales	Myoviridae	Unassigned		Singleton
Bdellovibrio~phage~phi1422	RefSeq-85	Caudovirales	Myoviridae	Unassigned		Outlier
Bdellovibrio~phage~phiMH2K	RefSeq-85	Unassigned	Microviridae	Bdellomicrovirus	154_0	Clustered	12	VC_154_0	12	0.8784	1	0.8784	3	2	1	1
Bordetella~virus~BPP1	RefSeq-85	Caudovirales	Podoviridae	Bpp1virus		Outlier
Brevibacillus~phage~Abouo	RefSeq-85	Caudovirales	Myoviridae	Abouovirus	118_0	Clustered	4	VC_118_0	4	0.5711	0.999977	0.5711	2	1	1	1
Brevibacillus~phage~Davies	RefSeq-85	Caudovirales	Myoviridae	Abouovirus	118_0	Clustered	4	VC_118_0	4	0.5711	0.999977	0.5711	2	1	1	1
Brevibacillus~phage~Jimmer1	RefSeq-85	Caudovirales	Myoviridae	Jimmervirus	118_0	Clustered	4	VC_118_0	4	0.5711	0.999977	0.5711	2	1	1	1
Brevibacillus~phage~Osiris	RefSeq-85	Caudovirales	Myoviridae	Jimmervirus	118_0	Clustered	4	VC_118_0	4	0.5711	0.999977	0.5711	2	1	1	1
Brochothrix~phage~A9	RefSeq-85	Caudovirales	Myoviridae	Unassigned		Outlier
Brochothrix~phage~BL3	RefSeq-85	Caudovirales	Siphoviridae	Unassigned		Outlier
Brochothrix~phage~NF5	RefSeq-85	Caudovirales	Siphoviridae	Unassigned	160_1	Clustered	4	VC_160_1	4	0.1288	0.999905	0.1288	1	2	2	1
Brucella~phage~BiPBO1	RefSeq-85	Unassigned	Unassigned	Unassigned	162_0	Clustered	2	VC_162_0	2	0.2412	0.937223	0.226	1	2	2	1
Brucella~phage~Pr	RefSeq-85	Caudovirales	Podoviridae	Prtbvirus	164_0	Clustered	2	VC_164_0	2	0.8136	0.937107	0.7624	1	1	1	1
Brucella~phage~Tb	RefSeq-85	Caudovirales	Podoviridae	Prtbvirus	164_0	Clustered	2	VC_164_0	2	0.8136	0.937107	0.7624	1	1	1	1
Burkholderia~phage~AH2	RefSeq-85	Caudovirales	Siphoviridae	Unassigned		Outlier
Burkholderia~phage~Bcep176	RefSeq-85	Caudovirales	Siphoviridae	Unassigned		Outlier
Burkholderia~phage~BcepB1A	RefSeq-85	Caudovirales	Myoviridae	Unassigned		Outlier
Burkholderia~phage~BcepGomr	RefSeq-85	Caudovirales	Siphoviridae	Unassigned		Outlier
Burkholderia~phage~BcepNazgul	RefSeq-85	Caudovirales	Siphoviridae	Unassigned		Outlier
Burkholderia~phage~JG068	RefSeq-85	Caudovirales	Podoviridae	Unassigned	28_0	Clustered	10	VC_28_0	10	0.2287	1	0.2287	2	2	2	1
Burkholderia~phage~KL1	RefSeq-85	Caudovirales	Siphoviridae	Septima3virus	1_0	Clustered	6	VC_1_0	6	0.4766	1	0.4766	2	1	1	1
Burkholderia~phage~KL3	RefSeq-85	Caudovirales	Myoviridae	Unassigned	69_0	Clustered	29	VC_69_0	29	0.804	1	0.804	2	1	1	1
Burkholderia~phage~KS10	RefSeq-85	Caudovirales	Myoviridae	Unassigned		Outlier
Burkholderia~phage~KS14	RefSeq-85	Caudovirales	Myoviridae	Unassigned	69_0	Clustered	29	VC_69_0	29	0.804	1	0.804	2	1	1	1
Burkholderia~phage~KS5	RefSeq-85	Caudovirales	Myoviridae	Unassigned	69_0	Clustered	29	VC_69_0	29	0.804	1	0.804	2	1	1	1
Burkholderia~phage~KS9	RefSeq-85	Caudovirales	Siphoviridae	Unassigned		Outlier
Burkholderia~phage~ST79	RefSeq-85	Caudovirales	Myoviridae	Unassigned	69_0	Clustered	29	VC_69_0	29	0.804	1	0.804	2	1	1	1
Burkholderia~virus~Bcep1	RefSeq-85	Caudovirales	Myoviridae	Bcep78virus	25_0	Clustered	4	VC_25_0	4	0.7417	0.999558	0.7413	1	1	1	1
Burkholderia~virus~Bcep22	RefSeq-85	Caudovirales	Podoviridae	Bcep22virus	176_0	Clustered	4	VC_176_0	4	0.75	0.999927	0.7499	1	1	1	1
Burkholderia~virus~Bcep43	RefSeq-85	Caudovirales	Myoviridae	Bcep78virus	25_0	Clustered	4	VC_25_0	4	0.7417	0.999558	0.7413	1	1	1	1
Burkholderia~virus~Bcep781	RefSeq-85	Caudovirales	Myoviridae	Bcep78virus	25_0	Clustered	4	VC_25_0	4	0.7417	0.999558	0.7413	1	1	1	1
Burkholderia~virus~BcepC6B	RefSeq-85	Caudovirales	Podoviridae	Bpp1virus		Outlier
Burkholderia~virus~BcepF1	RefSeq-85	Caudovirales	Myoviridae	Pbunavirus		Outlier
Burkholderia~virus~Bcepil02	RefSeq-85	Caudovirales	Podoviridae	Bcep22virus	176_0	Clustered	4	VC_176_0	4	0.75	0.999927	0.7499	1	1	1	1
Burkholderia~virus~Bcepmigl	RefSeq-85	Caudovirales	Podoviridae	Bcep22virus	176_0	Clustered	4	VC_176_0	4	0.75	0.999927	0.7499	1	1	1	1
Burkholderia~virus~BcepMu	RefSeq-85	Caudovirales	Myoviridae	Bcepmuvirus		Overlap (VC_92/VC_170)
Burkholderia~virus~BcepNY3	RefSeq-85	Caudovirales	Myoviridae	Bcep78virus	25_0	Clustered	4	VC_25_0	4	0.7417	0.999558	0.7413	1	1	1	1
Burkholderia~virus~DC1	RefSeq-85	Caudovirales	Podoviridae	Bcep22virus	176_0	Clustered	4	VC_176_0	4	0.75	0.999927	0.7499	1	1	1	1
Burkholderia~virus~phi1026b	RefSeq-85	Caudovirales	Siphoviridae	E125virus	161_0	Clustered	3	VC_161_0	3	0.2258	0.998454	0.2254	1	1	1	1
Burkholderia~virus~phi52237	RefSeq-85	Caudovirales	Myoviridae	P2virus	69_0	Clustered	29	VC_69_0	29	0.804	1	0.804	2	1	1	1
Burkholderia~virus~phi6442	RefSeq-85	Caudovirales	Siphoviridae	E125virus	161_0	Clustered	3	VC_161_0	3	0.2258	0.998454	0.2254	1	1	1	1
Burkholderia~virus~phiE122	RefSeq-85	Caudovirales	Myoviridae	P2virus	69_0	Clustered	29	VC_69_0	29	0.804	1	0.804	2	1	1	1
Burkholderia~virus~phiE125	RefSeq-85	Caudovirales	Siphoviridae	E125virus	161_0	Clustered	3	VC_161_0	3	0.2258	0.998454	0.2254	1	1	1	1
Burkholderia~virus~phiE202	RefSeq-85	Caudovirales	Myoviridae	P2virus	69_0	Clustered	29	VC_69_0	29	0.804	1	0.804	2	1	1	1
Burkholderia~virus~phiE255	RefSeq-85	Caudovirales	Myoviridae	Bcepmuvirus		Overlap (VC_92/VC_170)
Campylobacter~phage~CP30A	RefSeq-85	Caudovirales	Myoviridae	Cp8virus	36_0	Clustered	4	VC_36_0	4	0.1234	0.999988	0.1234	2	2	2	1
Campylobacter~phage~PC14	RefSeq-85	Unassigned	Unassigned	Unassigned	36_0	Clustered	4	VC_36_0	4	0.1234	0.999988	0.1234	2	2	2	1
Campylobacter~virus~CP21	RefSeq-85	Caudovirales	Myoviridae	Cp220virus	37_0	Clustered	3	VC_37_0	3	0.1291	0.998596	0.129	1	1	1	1
Campylobacter~virus~CP220	RefSeq-85	Caudovirales	Myoviridae	Cp220virus	37_0	Clustered	3	VC_37_0	3	0.1291	0.998596	0.129	1	1	1	1
Campylobacter~virus~CPt10	RefSeq-85	Caudovirales	Myoviridae	Cp220virus	37_0	Clustered	3	VC_37_0	3	0.1291	0.998596	0.129	1	1	1	1
Campylobacter~virus~CPX	RefSeq-85	Caudovirales	Myoviridae	Cp8virus	36_0	Clustered	4	VC_36_0	4	0.1234	0.999988	0.1234	2	2	2	1
Campylobacter~virus~NCTC12673	RefSeq-85	Caudovirales	Myoviridae	Cp8virus	36_0	Clustered	4	VC_36_0	4	0.1234	0.999988	0.1234	2	2	2	1
Caulobacter~phage~CcrColossus	RefSeq-85	Caudovirales	Siphoviridae	Unassigned		Outlier
Caulobacter~phage~Cr30	RefSeq-85	Caudovirales	Myoviridae	Unassigned		Outlier
Caulobacter~phage~Percy	RefSeq-85	Unassigned	Unassigned	Unassigned	28_0	Clustered	10	VC_28_0	10	0.2287	1	0.2287	2	2	2	1
Caulobacter~phage~phiCb5	RefSeq-85	Unassigned	Leviviridae	Unassigned		Outlier
Caulobacter~virus~Karma	RefSeq-85	Caudovirales	Siphoviridae	Phicbkvirus	178_0	Clustered	4	VC_178_0	4	0.4943	0.968532	0.4788	1	1	1	1
Caulobacter~virus~Magneto	RefSeq-85	Caudovirales	Siphoviridae	Phicbkvirus	178_0	Clustered	4	VC_178_0	4	0.4943	0.968532	0.4788	1	1	1	1
Caulobacter~virus~phiCbK	RefSeq-85	Caudovirales	Siphoviridae	Phicbkvirus	178_0	Clustered	4	VC_178_0	4	0.4943	0.968532	0.4788	1	1	1	1
Caulobacter~virus~Swift	RefSeq-85	Caudovirales	Siphoviridae	Phicbkvirus	178_0	Clustered	4	VC_178_0	4	0.4943	0.968532	0.4788	1	1	1	1
Celeribacter~phage~P12053L	RefSeq-85	Caudovirales	Unassigned	Unassigned	181_0	Clustered	2	VC_181_0	2	0.3141	0.942513	0.296	1	2	1	1
Cellulophaga~phage~phi10:1	RefSeq-85	Caudovirales	Siphoviridae	Unassigned	185_0	Clustered	2	VC_185_0	2	0.5145	0.922636	0.4747	1	1	1	1
Cellulophaga~phage~phi12:1	RefSeq-85	Caudovirales	Siphoviridae	Cba181virus	187_0	Clustered	3	VC_187_0	3	1	1	1	1	1	1	1
Cellulophaga~phage~phi12:2	RefSeq-85	Unassigned	Microviridae	Unassigned	188_0	Clustered	2	VC_188_0	2	1	1	1	1	1	1	1
Cellulophaga~phage~phi12a:1	RefSeq-85	Unassigned	Microviridae	Unassigned	188_0	Clustered	2	VC_188_0	2	1	1	1	1	1	1	1
Cellulophaga~phage~phi13:2	RefSeq-85	Caudovirales	Podoviridae	Unassigned	184_0	Clustered	4	VC_184_0	4	0.9119	0.999797	0.9117	1	1	1	1
Cellulophaga~phage~phi14:2	RefSeq-85	Caudovirales	Podoviridae	Unassigned		Outlier
Cellulophaga~phage~phi17:1	RefSeq-85	Caudovirales	Siphoviridae	Cba181virus	187_0	Clustered	3	VC_187_0	3	1	1	1	1	1	1	1
Cellulophaga~phage~phi17:2	RefSeq-85	Caudovirales	Podoviridae	Cba41virus	186_0	Clustered	2	VC_186_0	2	0.9317	0.912378	0.8501	1	1	1	1
Cellulophaga~phage~phi18:1	RefSeq-85	Caudovirales	Siphoviridae	Cba181virus	187_0	Clustered	3	VC_187_0	3	1	1	1	1	1	1	1
Cellulophaga~phage~phi18:3	RefSeq-85	Caudovirales	Podoviridae	Unassigned	184_0	Clustered	4	VC_184_0	4	0.9119	0.999797	0.9117	1	1	1	1
Cellulophaga~phage~phi19:1	RefSeq-85	Caudovirales	Siphoviridae	Unassigned	185_0	Clustered	2	VC_185_0	2	0.5145	0.922636	0.4747	1	1	1	1
Cellulophaga~phage~phi19:3	RefSeq-85	Caudovirales	Podoviridae	Unassigned	184_0	Clustered	4	VC_184_0	4	0.9119	0.999797	0.9117	1	1	1	1
Cellulophaga~phage~phi38:1	RefSeq-85	Caudovirales	Podoviridae	Unassigned		Outlier
Cellulophaga~phage~phi39:1	RefSeq-85	Caudovirales	Siphoviridae	Unassigned		Singleton
Cellulophaga~phage~phi4:1	RefSeq-85	Caudovirales	Podoviridae	Cba41virus	186_0	Clustered	2	VC_186_0	2	0.9317	0.912378	0.8501	1	1	1	1
Cellulophaga~phage~phi46:1	RefSeq-85	Caudovirales	Siphoviridae	Unassigned		Singleton
Cellulophaga~phage~phi46:3	RefSeq-85	Caudovirales	Podoviridae	Unassigned	184_0	Clustered	4	VC_184_0	4	0.9119	0.999797	0.9117	1	1	1	1
Cellulophaga~phage~phi48:2	RefSeq-85	Unassigned	Unassigned	Unassigned		Singleton
Cellulophaga~phage~phiSM	RefSeq-85	Caudovirales	Myoviridae	Unassigned	173_0	Clustered	2	VC_173_0	2	0.7457	0.904785	0.6747	1	1	1	1
Cellulophaga~phage~phiST	RefSeq-85	Caudovirales	Siphoviridae	Cbastvirus		Outlier
Chimpanzee~faeces~associated~microphage~1	RefSeq-85	Unassigned	Unassigned	Unassigned	190_0	Clustered	2	VC_190_0	2	0.1972	0.975699	0.1925	1	1	1	1
Chimpanzee~faeces~associated~microphage~2	RefSeq-85	Unassigned	Unassigned	Unassigned	154_0	Clustered	12	VC_154_0	12	0.8784	1	0.8784	3	2	1	1
Chimpanzee~faeces~associated~microphage~3	RefSeq-85	Unassigned	Unassigned	Unassigned	190_0	Clustered	2	VC_190_0	2	0.1972	0.975699	0.1925	1	1	1	1
Chlamydia~phage~2	RefSeq-85	Unassigned	Microviridae	Chlamydiamicrovirus	154_0	Clustered	12	VC_154_0	12	0.8784	1	0.8784	3	2	1	1
Chlamydia~phage~4	RefSeq-85	Unassigned	Microviridae	Unassigned	154_0	Clustered	12	VC_154_0	12	0.8784	1	0.8784	3	2	1	1
Chlamydia~virus~Chp1	RefSeq-85	Unassigned	Microviridae	Chlamydiamicrovirus		Singleton
Chlamydia~virus~CPAR39	RefSeq-85	Unassigned	Microviridae	Chlamydiamicrovirus	154_0	Clustered	12	VC_154_0	12	0.8784	1	0.8784	3	2	1	1
Citrobacter~phage~CR44b	RefSeq-85	Caudovirales	Podoviridae	Unassigned	34_0	Clustered	57	VC_34_0	57	0.8041	1	0.8041	3	2	2	1
Citrobacter~phage~CR8	RefSeq-85	Caudovirales	Podoviridae	Unassigned	34_0	Clustered	57	VC_34_0	57	0.8041	1	0.8041	3	2	2	1
Citrobacter~phage~CVT22	RefSeq-85	Caudovirales	Podoviridae	Unassigned	180_0	Clustered	4	VC_180_0	4	0.4979	0.999973	0.4979	1	2	2	1
Citrobacter~phage~IME-CF2	RefSeq-85	Caudovirales	Myoviridae	Unassigned	35_11	Clustered	8	VC_35_11	8	0.0634	1	0.0634	1	2	2	1
Citrobacter~phage~Margaery	RefSeq-85	Unassigned	Unassigned	Unassigned	35_11	Clustered	8	VC_35_11	8	0.0634	1	0.0634	1	2	2	1
Citrobacter~phage~Merlin	RefSeq-85	Caudovirales	Myoviridae	Moonvirus	35_4	Clustered	2	VC_35_4	2	0.0058	0.895962	0.0052	1	1	1	1
Citrobacter~phage~Michonne	RefSeq-85	Unassigned	Unassigned	Unassigned	16_0	Clustered	16	VC_16_0	16	0.8255	1	0.8255	4	2	2	1
Citrobacter~phage~Miller	RefSeq-85	Caudovirales	Myoviridae	Unassigned	35_11	Clustered	8	VC_35_11	8	0.0634	1	0.0634	1	2	2	1
Citrobacter~phage~Moogle	RefSeq-85	Caudovirales	Myoviridae	Mooglevirus	16_0	Clustered	16	VC_16_0	16	0.8255	1	0.8255	4	2	2	1
Citrobacter~phage~Moon	RefSeq-85	Caudovirales	Myoviridae	Moonvirus	35_4	Clustered	2	VC_35_4	2	0.0058	0.895962	0.0052	1	1	1	1
Citrobacter~phage~phiCFP-1	RefSeq-85	Caudovirales	Podoviridae	Unassigned	34_0	Clustered	57	VC_34_0	57	0.8041	1	0.8041	3	2	2	1
Citrobacter~phage~SH1	RefSeq-85	Unassigned	Unassigned	Unassigned	34_0	Clustered	57	VC_34_0	57	0.8041	1	0.8041	3	2	2	1
Citrobacter~phage~SH2	RefSeq-85	Unassigned	Unassigned	Unassigned	34_0	Clustered	57	VC_34_0	57	0.8041	1	0.8041	3	2	2	1
Citrobacter~phage~SH3	RefSeq-85	Unassigned	Unassigned	Unassigned	34_0	Clustered	57	VC_34_0	57	0.8041	1	0.8041	3	2	2	1
Citrobacter~phage~SH4	RefSeq-85	Unassigned	Unassigned	Unassigned	34_0	Clustered	57	VC_34_0	57	0.8041	1	0.8041	3	2	2	1
Citrobacter~phage~vB_CfrM_CfP1	RefSeq-85	Unassigned	Unassigned	Unassigned	35_11	Clustered	8	VC_35_11	8	0.0634	1	0.0634	1	2	2	1
Citrobacter~virus~Stevie	RefSeq-85	Caudovirales	Siphoviridae	Tlsvirus	170_0	Clustered	25	VC_170_0	25	0.8432	1	0.8432	6	2	2	0.9733
Clavibacter~phage~CMP1	RefSeq-85	Caudovirales	Siphoviridae	Unassigned	196_0	Clustered	3	VC_196_0	3	1	1	1	1	1	1	1
Clavibacter~phage~CN1A	RefSeq-85	Caudovirales	Siphoviridae	Unassigned	196_0	Clustered	3	VC_196_0	3	1	1	1	1	1	1	1
Clostridium~phage~CDMH1	RefSeq-85	Caudovirales	Myoviridae	Unassigned	156_1	Clustered	4	VC_156_1	4	0.3044	0.999981	0.3043	2	1	1	1
Clostridium~phage~c-st	RefSeq-85	Caudovirales	Myoviridae	Unassigned		Outlier
Clostridium~phage~phi24R	RefSeq-85	Caudovirales	Podoviridae	Unassigned		Outlier
Clostridium~phage~phi3626	RefSeq-85	Caudovirales	Siphoviridae	Unassigned	132_0	Clustered	3	VC_132_0	3	0.194	0.997591	0.1935	1	1	1	1
Clostridium~phage~phi8074-B1	RefSeq-85	Caudovirales	Siphoviridae	Unassigned		Outlier
Clostridium~phage~phiCD111	RefSeq-85	Caudovirales	Siphoviridae	Unassigned	197_0	Clustered	3	VC_197_0	3	0.5508	0.997727	0.5496	1	1	1	1
Clostridium~phage~phiCD146	RefSeq-85	Caudovirales	Siphoviridae	Unassigned	197_0	Clustered	3	VC_197_0	3	0.5508	0.997727	0.5496	1	1	1	1
Clostridium~phage~phiCD211	RefSeq-85	Caudovirales	Myoviridae	Unassigned		Outlier
Clostridium~phage~phiCD38-2	RefSeq-85	Caudovirales	Siphoviridae	Unassigned	197_0	Clustered	3	VC_197_0	3	0.5508	0.997727	0.5496	1	1	1	1
Clostridium~phage~phiCD481-1	RefSeq-85	Caudovirales	Myoviridae	Unassigned	140_0	Clustered	5	VC_140_0	5	0.5502	1	0.5502	1	1	1	1
Clostridium~phage~phiCD505	RefSeq-85	Caudovirales	Myoviridae	Unassigned		Overlap (VC_128/VC_157)
Clostridium~phage~phiCD506	RefSeq-85	Caudovirales	Myoviridae	Unassigned	140_0	Clustered	5	VC_140_0	5	0.5502	1	0.5502	1	1	1	1
Clostridium~phage~phiCD6356	RefSeq-85	Caudovirales	Siphoviridae	Unassigned		Outlier
Clostridium~phage~phiCDHM11	RefSeq-85	Caudovirales	Myoviridae	Unassigned	140_0	Clustered	5	VC_140_0	5	0.5502	1	0.5502	1	1	1	1
Clostridium~phage~phiCDHM13	RefSeq-85	Caudovirales	Myoviridae	Unassigned	140_0	Clustered	5	VC_140_0	5	0.5502	1	0.5502	1	1	1	1
Clostridium~phage~phiCDHM19	RefSeq-85	Caudovirales	Myoviridae	Unassigned	156_0	Clustered	2	VC_156_0	2	0.104	0.953358	0.0991	2	1	1	1
Clostridium~phage~phiCP13O	RefSeq-85	Caudovirales	Siphoviridae	Unassigned	138_0	Clustered	4	VC_138_0	4	0.9537	0.999854	0.9536	1	1	1	1
Clostridium~phage~phiCP26F	RefSeq-85	Caudovirales	Siphoviridae	Unassigned	138_0	Clustered	4	VC_138_0	4	0.9537	0.999854	0.9536	1	1	1	1
Clostridium~phage~phiCP34O	RefSeq-85	Caudovirales	Siphoviridae	Unassigned	138_0	Clustered	4	VC_138_0	4	0.9537	0.999854	0.9536	1	1	1	1
Clostridium~phage~phiCP39-O	RefSeq-85	Caudovirales	Siphoviridae	Unassigned	138_0	Clustered	4	VC_138_0	4	0.9537	0.999854	0.9536	1	1	1	1
Clostridium~phage~phiCP7R	RefSeq-85	Caudovirales	Podoviridae	Unassigned	198_0	Clustered	3	VC_198_0	3	0.8051	0.959572	0.7726	1	1	1	1
Clostridium~phage~phiCPV4	RefSeq-85	Caudovirales	Podoviridae	Unassigned	198_0	Clustered	3	VC_198_0	3	0.8051	0.959572	0.7726	1	1	1	1
Clostridium~phage~phiCT19406A	RefSeq-85	Unassigned	Unassigned	Unassigned	134_0	Clustered	2	VC_134_0	2	0.4497	0.94413	0.4246	1	1	1	1
Clostridium~phage~phiCT19406B	RefSeq-85	Unassigned	Unassigned	Unassigned	115_0	Clustered	3	VC_115_0	3	0.3747	0.998132	0.374	1	1	1	1
Clostridium~phage~phiCT19406C	RefSeq-85	Unassigned	Unassigned	Unassigned		Outlier
Clostridium~phage~phiCT453A	RefSeq-85	Unassigned	Unassigned	Unassigned		Outlier
Clostridium~phage~phiCT453B	RefSeq-85	Unassigned	Unassigned	Unassigned	115_0	Clustered	3	VC_115_0	3	0.3747	0.998132	0.374	1	1	1	1
Clostridium~phage~phiCT9441A	RefSeq-85	Unassigned	Unassigned	Unassigned		Outlier
Clostridium~phage~phiCTC2A	RefSeq-85	Unassigned	Unassigned	Unassigned	134_0	Clustered	2	VC_134_0	2	0.4497	0.94413	0.4246	1	1	1	1
Clostridium~phage~phiCTC2B	RefSeq-85	Unassigned	Unassigned	Unassigned	115_0	Clustered	3	VC_115_0	3	0.3747	0.998132	0.374	1	1	1	1
Clostridium~phage~phiCTP1	RefSeq-85	Caudovirales	Siphoviridae	Unassigned	104_0	Clustered	2	VC_104_0	2	0.3741	0.914185	0.342	1	1	1	1
Clostridium~phage~phiMMP01	RefSeq-85	Caudovirales	Myoviridae	Unassigned	156_1	Clustered	4	VC_156_1	4	0.3044	0.999981	0.3043	2	1	1	1
Clostridium~phage~phiMMP02	RefSeq-85	Caudovirales	Myoviridae	Unassigned		Overlap (VC_128/VC_157)
Clostridium~phage~phiMMP03	RefSeq-85	Caudovirales	Myoviridae	Unassigned	156_1	Clustered	4	VC_156_1	4	0.3044	0.999981	0.3043	2	1	1	1
Clostridium~phage~phiMMP04	RefSeq-85	Caudovirales	Myoviridae	Unassigned	140_0	Clustered	5	VC_140_0	5	0.5502	1	0.5502	1	1	1	1
Clostridium~phage~PhiS63	RefSeq-85	Caudovirales	Siphoviridae	Unassigned	132_0	Clustered	3	VC_132_0	3	0.194	0.997591	0.1935	1	1	1	1
Clostridium~phage~phiSM101	RefSeq-85	Caudovirales	Siphoviridae	Unassigned	132_0	Clustered	3	VC_132_0	3	0.194	0.997591	0.1935	1	1	1	1
Clostridium~phage~phiZP2	RefSeq-85	Caudovirales	Podoviridae	Unassigned	198_0	Clustered	3	VC_198_0	3	0.8051	0.959572	0.7726	1	1	1	1
Clostridium~phage~vB_CpeS-CP51	RefSeq-85	Caudovirales	Siphoviridae	Unassigned		Outlier
Clostridium~virus~phiC2	RefSeq-85	Caudovirales	Myoviridae	Cd119virus	156_1	Clustered	4	VC_156_1	4	0.3044	0.999981	0.3043	2	1	1	1
Clostridium~virus~phiCD119	RefSeq-85	Caudovirales	Myoviridae	Cd119virus	156_0	Clustered	2	VC_156_0	2	0.104	0.953358	0.0991	2	1	1	1
Clostridium~virus~phiCD27	RefSeq-85	Caudovirales	Myoviridae	Cd119virus		Overlap (VC_128/VC_157)
Colwellia~phage~9A	RefSeq-85	Caudovirales	Siphoviridae	Unassigned		Outlier
Corynebacterium~phage~BFK20	RefSeq-85	Caudovirales	Siphoviridae	Unassigned		Outlier
Corynebacterium~phage~P1201	RefSeq-85	Caudovirales	Siphoviridae	Unassigned		Outlier
Croceibacter~phage~P2559S	RefSeq-85	Caudovirales	Siphoviridae	Unassigned		Outlier
Croceibacter~phage~P2559Y	RefSeq-85	Caudovirales	Siphoviridae	Unassigned		Outlier
Cronobacter~phage~CR3	RefSeq-85	Caudovirales	Myoviridae	Cr3virus		Overlap (VC_58/VC_69)
Cronobacter~phage~CR5	RefSeq-85	Caudovirales	Myoviridae	Unassigned	205_0	Clustered	3	VC_205_0	3	0.1208	0.997949	0.1206	1	2	2	1
Cronobacter~phage~CR8	RefSeq-85	Caudovirales	Myoviridae	Cr3virus		Overlap (VC_58/VC_69)
Cronobacter~phage~CR9	RefSeq-85	Caudovirales	Myoviridae	Cr3virus		Overlap (VC_58/VC_69)
Cronobacter~phage~Dev2	RefSeq-85	Caudovirales	Podoviridae	Unassigned	34_0	Clustered	57	VC_34_0	57	0.8041	1	0.8041	3	2	2	1
Cronobacter~phage~Dev-CD-23823	RefSeq-85	Caudovirales	Podoviridae	Unassigned	27_0	Clustered	5	VC_27_0	5	0.2231	1	0.2231	1	1	1	1
Cronobacter~phage~ENT39118	RefSeq-85	Caudovirales	Siphoviridae	Unassigned		Outlier
Cronobacter~phage~ENT47670	RefSeq-85	Caudovirales	Myoviridae	Unassigned		Outlier
Cronobacter~phage~PBES~02	RefSeq-85	Caudovirales	Myoviridae	Cr3virus		Overlap (VC_58/VC_69)
Cronobacter~phage~phiES15	RefSeq-85	Caudovirales	Siphoviridae	Unassigned		Outlier
Cronobacter~phage~vB_CsaM_GAP161	RefSeq-85	Caudovirales	Myoviridae	Unassigned	35_11	Clustered	8	VC_35_11	8	0.0634	1	0.0634	1	2	2	1
Cronobacter~phage~vB_CsaM_GAP31	RefSeq-85	Caudovirales	Myoviridae	Se1virus	57_1	Clustered	2	VC_57_1	2	0.0562	0.948867	0.0534	1	1	1	1
Cronobacter~phage~vB_CsaP_GAP52	RefSeq-85	Caudovirales	Podoviridae	Unassigned	194_0	Clustered	2	VC_194_0	2	0.1684	0.954881	0.1608	1	1	1	1
Cronobacter~phage~vB_CskP_GAP227	RefSeq-85	Caudovirales	Podoviridae	Unassigned	27_0	Clustered	5	VC_27_0	5	0.2231	1	0.2231	1	1	1	1
Cronobacter~virus~ESP29491	RefSeq-85	Caudovirales	Siphoviridae	Unassigned	170_0	Clustered	25	VC_170_0	25	0.8432	1	0.8432	6	2	2	0.9733
Cyanophage~9515-10a	RefSeq-85	Caudovirales	Podoviridae	Unassigned	179_0	Clustered	17	VC_179_0	17	0.3821	1	0.3821	1	2	2	1
Cyanophage~KBS-P-1A	RefSeq-85	Unassigned	Unassigned	Unassigned	179_0	Clustered	17	VC_179_0	17	0.3821	1	0.3821	1	2	2	1
Cyanophage~KBS-S-2A	RefSeq-85	Unassigned	Unassigned	Unassigned		Outlier
Cyanophage~MED4-117	RefSeq-85	Unassigned	Unassigned	Unassigned	171_0	Clustered	2	VC_171_0	2	0.702	0.879217	0.6172	1	2	2	1
Cyanophage~NATL1A-7	RefSeq-85	Caudovirales	Podoviridae	Unassigned	179_0	Clustered	17	VC_179_0	17	0.3821	1	0.3821	1	2	2	1
Cyanophage~NATL2A-133	RefSeq-85	Caudovirales	Podoviridae	Unassigned	179_0	Clustered	17	VC_179_0	17	0.3821	1	0.3821	1	2	2	1
Cyanophage~PP	RefSeq-85	Caudovirales	Podoviridae	Unassigned	78_0	Clustered	2	VC_78_0	2	0.5249	0.868224	0.4557	1	1	1	1
Cyanophage~P-RSM1	RefSeq-85	Caudovirales	Myoviridae	Unassigned	40_15	Clustered	2	VC_40_15	2	0.0111	0.952776	0.0106	1	1	1	1
Cyanophage~PSS2	RefSeq-85	Caudovirales	Siphoviridae	Unassigned	210_0	Clustered	2	VC_210_0	2	0.7697	0.879217	0.6767	1	1	1	1
Cyanophage~P-SSP2	RefSeq-85	Unassigned	Unassigned	Unassigned	179_0	Clustered	17	VC_179_0	17	0.3821	1	0.3821	1	2	2	1
Cyanophage~S-RIM50	RefSeq-85	Unassigned	Unassigned	Unassigned	40_9	Clustered	2	VC_40_9	2	0.0104	0.943715	0.0099	1	2	2	1
Cyanophage~SS120-1	RefSeq-85	Unassigned	Unassigned	Unassigned	179_0	Clustered	17	VC_179_0	17	0.3821	1	0.3821	1	2	2	1
Cyanophage~S-TIM5	RefSeq-85	Caudovirales	Myoviridae	Unassigned		Outlier
Cyanophage~Syn30	RefSeq-85	Unassigned	Unassigned	Unassigned	40_6	Clustered	3	VC_40_6	3	0.021	0.996938	0.021	1	2	2	0.6667
Deep-sea~thermophilic~phage~D6E	RefSeq-85	Unassigned	Unassigned	Unassigned		Outlier
Deftia~phage~phiW-14	RefSeq-85	Caudovirales	Myoviridae	Unassigned		Outlier
Delftia~phage~IME-DE1	RefSeq-85	Caudovirales	Podoviridae	Unassigned	34_0	Clustered	57	VC_34_0	57	0.8041	1	0.8041	3	2	2	1
Delftia~phage~RG-2014	RefSeq-85	Caudovirales	Podoviridae	Unassigned		Outlier
Dickeya~phage~RC-2014	RefSeq-85	Caudovirales	Ackermannviridae	Limestonevirus	41_1	Clustered	19	VC_41_1	19	0.4193	1	0.4193	5	1	1	0.8655
Dickeya~virus~Limestone	RefSeq-85	Caudovirales	Ackermannviridae	Limestonevirus	41_1	Clustered	19	VC_41_1	19	0.4193	1	0.4193	5	1	1	0.8655
Dinoroseobacter~phage~DFL12phi1	RefSeq-85	Caudovirales	Podoviridae	Dfl12virus	8_0	Clustered	4	VC_8_0	4	0.1611	0.999982	0.1611	2	1	1	1
Edwardsiella~phage~eiAU-183	RefSeq-85	Caudovirales	Siphoviridae	Eiauvirus		Outlier
Edwardsiella~phage~GF-2	RefSeq-85	Caudovirales	Myoviridae	Unassigned		Outlier
Edwardsiella~phage~KF-1	RefSeq-85	Caudovirales	Podoviridae	Kf1virus	211_0	Clustered	3	VC_211_0	3	1	1	1	2	2	2	1
Edwardsiella~phage~MSW-3	RefSeq-85	Caudovirales	Myoviridae	Msw3virus	75_0	Clustered	6	VC_75_0	6	0.7487	1	0.7487	2	1	1	1
Edwardsiella~phage~PEi21	RefSeq-85	Caudovirales	Myoviridae	Msw3virus	75_0	Clustered	6	VC_75_0	6	0.7487	1	0.7487	2	1	1	1
Eel~River~basin~pequenovirus	RefSeq-85	Unassigned	Microviridae	Unassigned		Outlier
Enterobacter~phage~Arya	RefSeq-85	Unassigned	Unassigned	Unassigned	89_0	Clustered	4	VC_89_0	4	0.2533	0.999984	0.2533	2	2	2	1
Enterobacter~phage~CC31	RefSeq-85	Caudovirales	Myoviridae	Cc31virus	35_5	Clustered	2	VC_35_5	2	0.0058	0.933737	0.0054	1	1	1	1
Enterobacter~phage~E-2	RefSeq-85	Caudovirales	Podoviridae	Unassigned	34_0	Clustered	57	VC_34_0	57	0.8041	1	0.8041	3	2	2	1
Enterobacter~phage~E-3	RefSeq-85	Caudovirales	Podoviridae	Unassigned	34_0	Clustered	57	VC_34_0	57	0.8041	1	0.8041	3	2	2	1
Enterobacter~phage~EcP1	RefSeq-85	Caudovirales	Podoviridae	Unassigned		Outlier
Enterobacter~phage~Enc34	RefSeq-85	Caudovirales	Siphoviridae	Unassigned	15_0	Clustered	9	VC_15_0	9	0.6303	1	0.6303	2	2	2	1
Enterobacter~phage~PG7	RefSeq-85	Caudovirales	Myoviridae	Cc31virus	35_5	Clustered	2	VC_35_5	2	0.0058	0.933737	0.0054	1	1	1	1
Enterobacter~phage~phiEap-1	RefSeq-85	Caudovirales	Podoviridae	Unassigned	34_0	Clustered	57	VC_34_0	57	0.8041	1	0.8041	3	2	2	1
Enterobacter~phage~phiEap-2	RefSeq-85	Caudovirales	Podoviridae	Unassigned	49_0	Clustered	17	VC_49_0	17	0.7676	1	0.7676	4	3	2	1
Enterobacter~phage~Tyrion	RefSeq-85	Unassigned	Unassigned	Unassigned	148_0	Clustered	5	VC_148_0	5	0.6227	1	0.6227	2	2	2	1
Enterobacteria~phage~13a	RefSeq-85	Caudovirales	Podoviridae	Unassigned	34_0	Clustered	57	VC_34_0	57	0.8041	1	0.8041	3	2	2	1
Enterobacteria~phage~285P	RefSeq-85	Caudovirales	Podoviridae	Unassigned	34_0	Clustered	57	VC_34_0	57	0.8041	1	0.8041	3	2	2	1
Enterobacteria~phage~933W	RefSeq-85	Caudovirales	Podoviridae	Nona33virus	71_1	Clustered	13	VC_71_1	13	0.5146	1	0.5146	4	1	1	0.8846
Enterobacteria~phage~9g	RefSeq-85	Caudovirales	Siphoviridae	Nonagvirus	14_0	Clustered	4	VC_14_0	4	0.4529	0.999975	0.4529	1	1	1	1
Enterobacteria~phage~alpha3	RefSeq-85	Unassigned	Microviridae	Alpha3microvirus	212_0	Clustered	8	VC_212_0	8	0.9651	0.999991	0.965	4	1	1	1
Enterobacteria~phage~BA14	RefSeq-85	Caudovirales	Podoviridae	Unassigned	34_0	Clustered	57	VC_34_0	57	0.8041	1	0.8041	3	2	2	1
Enterobacteria~phage~BP-4795	RefSeq-85	Caudovirales	Siphoviridae	Unassigned		Outlier
Enterobacteria~phage~Bp7	RefSeq-85	Caudovirales	Myoviridae	Js98virus	35_9	Clustered	8	VC_35_9	8	0.0415	1	0.0415	2	2	2	1
Enterobacteria~phage~C-1~INW-2012	RefSeq-85	Unassigned	Leviviridae	Unassigned	215_0	Clustered	4	VC_215_0	4	0.7023	0.999976	0.7023	1	1	1	1
Enterobacteria~phage~cdtI	RefSeq-85	Caudovirales	Siphoviridae	Unassigned		Overlap (VC_75/VC_173)
Enterobacteria~phage~EcoDS1	RefSeq-85	Caudovirales	Podoviridae	Unassigned	34_0	Clustered	57	VC_34_0	57	0.8041	1	0.8041	3	2	2	1
Enterobacteria~phage~epsilon15	RefSeq-85	Caudovirales	Podoviridae	Epsilon15virus	148_0	Clustered	5	VC_148_0	5	0.6227	1	0.6227	2	2	2	1
Enterobacteria~phage~ES18	RefSeq-85	Caudovirales	Siphoviridae	Unassigned	12_1	Clustered	2	VC_12_1	2	0.0294	0.956725	0.0282	1	1	1	1
Enterobacteria~phage~fd	RefSeq-85	Unassigned	Inoviridae	Inovirus	218_0	Clustered	3	VC_218_0	3	0.7193	0.963901	0.6933	2	1	1	1
Enterobacteria~phage~FI~sensu~lato	RefSeq-85	Unassigned	Leviviridae	Unassigned	33_0	Clustered	3	VC_33_0	3	0.7023	0.996222	0.6996	2	1	1	1
Enterobacteria~phage~fiAA91-ss	RefSeq-85	Caudovirales	Myoviridae	Unassigned	69_0	Clustered	29	VC_69_0	29	0.804	1	0.804	2	1	1	1
Enterobacteria~phage~G4~sensu~lato	RefSeq-85	Unassigned	Microviridae	G4microvirus	212_0	Clustered	8	VC_212_0	8	0.9651	0.999991	0.965	4	1	1	1
Enterobacteria~phage~GEC-3S	RefSeq-85	Caudovirales	Myoviridae	Unassigned	35_14	Clustered	4	VC_35_14	4	0.0248	0.999988	0.0248	2	1	1	1
Enterobacteria~phage~Hgal1	RefSeq-85	Unassigned	Leviviridae	Unassigned	215_0	Clustered	4	VC_215_0	4	0.7023	0.999976	0.7023	1	1	1	1
Enterobacteria~phage~HK106	RefSeq-85	Caudovirales	Siphoviridae	Hk97virus	12_0	Clustered	12	VC_12_0	12	0.3022	1	0.3022	3	1	1	1
Enterobacteria~phage~HK140	RefSeq-85	Caudovirales	Siphoviridae	Unassigned	12_0	Clustered	12	VC_12_0	12	0.3022	1	0.3022	3	1	1	1
Enterobacteria~phage~HK225	RefSeq-85	Caudovirales	Siphoviridae	Unassigned		Overlap (VC_75/VC_173)
Enterobacteria~phage~HK446	RefSeq-85	Caudovirales	Siphoviridae	Hk97virus	12_0	Clustered	12	VC_12_0	12	0.3022	1	0.3022	3	1	1	1
Enterobacteria~phage~HK542	RefSeq-85	Caudovirales	Siphoviridae	Hk97virus	12_0	Clustered	12	VC_12_0	12	0.3022	1	0.3022	3	1	1	1
Enterobacteria~phage~HK544	RefSeq-85	Caudovirales	Siphoviridae	Hk97virus	12_0	Clustered	12	VC_12_0	12	0.3022	1	0.3022	3	1	1	1
Enterobacteria~phage~HK629	RefSeq-85	Caudovirales	Siphoviridae	Lambdavirus		Overlap (VC_13/VC_173)
Enterobacteria~phage~HK630	RefSeq-85	Caudovirales	Siphoviridae	Lambdavirus		Overlap (VC_13/VC_173)
Enterobacteria~phage~HK633	RefSeq-85	Caudovirales	Siphoviridae	Hk97virus	12_0	Clustered	12	VC_12_0	12	0.3022	1	0.3022	3	1	1	1
Enterobacteria~phage~ID18~sensu~lato	RefSeq-85	Unassigned	Microviridae	Unassigned	212_0	Clustered	8	VC_212_0	8	0.9651	0.999991	0.965	4	1	1	1
Enterobacteria~phage~ID2~Moscow/ID/2001	RefSeq-85	Unassigned	Microviridae	G4microvirus	212_0	Clustered	8	VC_212_0	8	0.9651	0.999991	0.965	4	1	1	1
Enterobacteria~phage~If1	RefSeq-85	Unassigned	Inoviridae	Unassigned	218_0	Clustered	3	VC_218_0	3	0.7193	0.963901	0.6933	2	1	1	1
Enterobacteria~phage~Ike	RefSeq-85	Unassigned	Inoviridae	Lineavirus	217_0	Clustered	2	VC_217_0	2	0.3882	0.827111	0.3211	1	1	1	1
Enterobacteria~phage~IME08	RefSeq-85	Caudovirales	Myoviridae	Js98virus	35_9	Clustered	8	VC_35_9	8	0.0415	1	0.0415	2	2	2	1
Enterobacteria~phage~IME10	RefSeq-85	Caudovirales	Podoviridae	Unassigned		Outlier
Enterobacteria~phage~J8-65	RefSeq-85	Caudovirales	Podoviridae	Unassigned		Outlier
Enterobacteria~phage~JenK1	RefSeq-85	Caudovirales	Siphoviridae	Nonagvirus	14_0	Clustered	4	VC_14_0	4	0.4529	0.999975	0.4529	1	1	1	1
Enterobacteria~phage~JenP1	RefSeq-85	Caudovirales	Siphoviridae	Nonagvirus	14_0	Clustered	4	VC_14_0	4	0.4529	0.999975	0.4529	1	1	1	1
Enterobacteria~phage~JenP2	RefSeq-85	Caudovirales	Siphoviridae	Nonagvirus	14_0	Clustered	4	VC_14_0	4	0.4529	0.999975	0.4529	1	1	1	1
Enterobacteria~phage~JS10	RefSeq-85	Caudovirales	Myoviridae	Js98virus	35_9	Clustered	8	VC_35_9	8	0.0415	1	0.0415	2	2	2	1
Enterobacteria~phage~K1F	RefSeq-85	Caudovirales	Podoviridae	Unassigned	34_0	Clustered	57	VC_34_0	57	0.8041	1	0.8041	3	2	2	1
Enterobacteria~phage~M	RefSeq-85	Unassigned	Leviviridae	Unassigned	215_0	Clustered	4	VC_215_0	4	0.7023	0.999976	0.7023	1	1	1	1
Enterobacteria~phage~mEp043~c-1	RefSeq-85	Caudovirales	Siphoviridae	Unassigned		Overlap (VC_13/VC_173)
Enterobacteria~phage~mEp235	RefSeq-85	Caudovirales	Siphoviridae	Unassigned	12_0	Clustered	12	VC_12_0	12	0.3022	1	0.3022	3	1	1	1
Enterobacteria~phage~mEp237	RefSeq-85	Caudovirales	Siphoviridae	Unassigned		Overlap (VC_75/VC_173)
Enterobacteria~phage~mEp460	RefSeq-85	Caudovirales	Siphoviridae	Unassigned		Overlap (VC_75/VC_173)
Enterobacteria~phage~mEpX1	RefSeq-85	Caudovirales	Siphoviridae	Hk97virus	12_0	Clustered	12	VC_12_0	12	0.3022	1	0.3022	3	1	1	1
Enterobacteria~phage~mEpX2	RefSeq-85	Caudovirales	Siphoviridae	Hk97virus	12_0	Clustered	12	VC_12_0	12	0.3022	1	0.3022	3	1	1	1
Enterobacteria~phage~P4	RefSeq-85	Caudovirales	Myoviridae	Unassigned		Singleton
Enterobacteria~phage~P88	RefSeq-85	Caudovirales	Myoviridae	Unassigned	69_0	Clustered	29	VC_69_0	29	0.804	1	0.804	2	1	1	1
Enterobacteria~phage~Phi1	RefSeq-85	Caudovirales	Myoviridae	Rb49virus	35_14	Clustered	4	VC_35_14	4	0.0248	0.999988	0.0248	2	1	1	1
Enterobacteria~phage~phi80	RefSeq-85	Caudovirales	Siphoviridae	Unassigned		Overlap (VC_75/VC_173)
Enterobacteria~phage~phi92	RefSeq-85	Caudovirales	Myoviridae	Unassigned	58_0	Clustered	2	VC_58_0	2	0.1254	0.956808	0.12	1	1	1	1
Enterobacteria~phage~phiEcoM-GJ1	RefSeq-85	Caudovirales	Myoviridae	Unassigned	53_0	Clustered	5	VC_53_0	5	0.9799	0.999938	0.9798	1	1	1	1
Enterobacteria~phage~phiP27	RefSeq-85	Caudovirales	Myoviridae	Unassigned	93_0	Clustered	2	VC_93_0	2	0.0263	0.915589	0.0241	1	1	1	1
Enterobacteria~phage~phiX174~sensu~lato	RefSeq-85	Unassigned	Microviridae	Phix174microvirus	212_0	Clustered	8	VC_212_0	8	0.9651	0.999991	0.965	4	1	1	1
Enterobacteria~phage~RB14	RefSeq-85	Caudovirales	Myoviridae	T4virus	35_13	Clustered	27	VC_35_13	27	0.1738	1	0.1738	2	2	2	1
Enterobacteria~phage~RB16	RefSeq-85	Caudovirales	Myoviridae	Unassigned	35_11	Clustered	8	VC_35_11	8	0.0634	1	0.0634	1	2	2	1
Enterobacteria~phage~RB27	RefSeq-85	Caudovirales	Myoviridae	Unassigned	35_13	Clustered	27	VC_35_13	27	0.1738	1	0.1738	2	2	2	1
Enterobacteria~phage~RB3	RefSeq-85	Caudovirales	Myoviridae	T4virus	35_13	Clustered	27	VC_35_13	27	0.1738	1	0.1738	2	2	2	1
Enterobacteria~phage~RB32	RefSeq-85	Caudovirales	Myoviridae	Unassigned	35_13	Clustered	27	VC_35_13	27	0.1738	1	0.1738	2	2	2	1
Enterobacteria~phage~RB43	RefSeq-85	Caudovirales	Myoviridae	Unassigned	35_11	Clustered	8	VC_35_11	8	0.0634	1	0.0634	1	2	2	1
Enterobacteria~phage~RB49	RefSeq-85	Caudovirales	Myoviridae	Rb49virus	35_14	Clustered	4	VC_35_14	4	0.0248	0.999988	0.0248	2	1	1	1
Enterobacteria~phage~RB51	RefSeq-85	Caudovirales	Myoviridae	Unassigned	35_13	Clustered	27	VC_35_13	27	0.1738	1	0.1738	2	2	2	1
Enterobacteria~phage~RB68	RefSeq-85	Caudovirales	Myoviridae	Unassigned	35_13	Clustered	27	VC_35_13	27	0.1738	1	0.1738	2	2	2	1
Enterobacteria~phage~RB69	RefSeq-85	Caudovirales	Myoviridae	Rb69virus	35_12	Clustered	7	VC_35_12	7	0.0354	1	0.0354	2	2	2	1
Enterobacteria~phage~Sf101	RefSeq-85	Caudovirales	Podoviridae	Unassigned		Overlap (VC_13/VC_151)
Enterobacteria~phage~SfI	RefSeq-85	Caudovirales	Myoviridae	Unassigned	93_0	Clustered	2	VC_93_0	2	0.0263	0.915589	0.0241	1	1	1	1
Enterobacteria~phage~SfV	RefSeq-85	Caudovirales	Myoviridae	Unassigned		Overlap (VC_73/VC_94)
Enterobacteria~phage~St-1	RefSeq-85	Unassigned	Microviridae	Alpha3microvirus	212_0	Clustered	8	VC_212_0	8	0.9651	0.999991	0.965	4	1	1	1
Enterobacteria~phage~ST104	RefSeq-85	Caudovirales	Podoviridae	Unassigned		Overlap (VC_13/VC_151)
Enterobacteria~phage~T3	RefSeq-85	Caudovirales	Podoviridae	Unassigned	34_0	Clustered	57	VC_34_0	57	0.8041	1	0.8041	3	2	2	1
Enterobacteria~phage~T4	RefSeq-85	Caudovirales	Myoviridae	T4virus	35_13	Clustered	27	VC_35_13	27	0.1738	1	0.1738	2	2	2	1
Enterobacteria~phage~T7	RefSeq-85	Caudovirales	Podoviridae	T7virus	34_0	Clustered	57	VC_34_0	57	0.8041	1	0.8041	3	2	2	1
Enterobacteria~phage~UAB_Phi20	RefSeq-85	Unassigned	Unassigned	Unassigned		Overlap (VC_13/VC_151)
Enterobacteria~phage~UAB_Phi78	RefSeq-85	Caudovirales	Podoviridae	Unassigned	30_0	Clustered	15	VC_30_0	15	0.4346	1	0.4346	2	2	2	1
Enterobacteria~phage~vB_EcoM_VR5	RefSeq-85	Caudovirales	Myoviridae	Js98virus	35_9	Clustered	8	VC_35_9	8	0.0415	1	0.0415	2	2	2	1
Enterobacteria~phage~vB_EcoP_ACG-C91	RefSeq-85	Caudovirales	Podoviridae	Unassigned	30_0	Clustered	15	VC_30_0	15	0.4346	1	0.4346	2	2	2	1
Enterobacteria~phage~vB_EcoS_NBD2	RefSeq-85	Unassigned	Unassigned	Unassigned	170_0	Clustered	25	VC_170_0	25	0.8432	1	0.8432	6	2	2	0.9733
Enterobacteria~phage~vB_EcoS_Rogue1	RefSeq-85	Caudovirales	Siphoviridae	Rogue1virus	170_0	Clustered	25	VC_170_0	25	0.8432	1	0.8432	6	2	2	0.9733
Enterobacteria~phage~VT2phi_272	RefSeq-85	Caudovirales	Podoviridae	Unassigned	71_1	Clustered	13	VC_71_1	13	0.5146	1	0.5146	4	1	1	0.8846
Enterobacteria~phage~VT2-Sakai	RefSeq-85	Caudovirales	Podoviridae	Nona33virus	71_1	Clustered	13	VC_71_1	13	0.5146	1	0.5146	4	1	1	0.8846
Enterobacteria~phage~WA13~sensu~lato	RefSeq-85	Unassigned	Microviridae	Unassigned	212_0	Clustered	8	VC_212_0	8	0.9651	0.999991	0.965	4	1	1	1
Enterobacteria~phage~WPhi	RefSeq-85	Caudovirales	Myoviridae	P2virus	69_0	Clustered	29	VC_69_0	29	0.804	1	0.804	2	1	1	1
Enterobacteria~phage~YYZ-2008	RefSeq-85	Unassigned	Unassigned	Unassigned		Outlier
Enterobacterial~phage~mEp213	RefSeq-85	Caudovirales	Siphoviridae	Unassigned		Overlap (VC_13/VC_173)
Enterobacterial~phage~mEp234	RefSeq-85	Caudovirales	Siphoviridae	Unassigned	12_0	Clustered	12	VC_12_0	12	0.3022	1	0.3022	3	1	1	1
Enterobacterial~phage~mEp390	RefSeq-85	Caudovirales	Siphoviridae	Unassigned		Outlier
Enterobacteriaphage~UAB_Phi87	RefSeq-85	Caudovirales	Myoviridae	Felixo1virus	16_0	Clustered	16	VC_16_0	16	0.8255	1	0.8255	4	2	2	1
Enterococcus~phage~BC611	RefSeq-85	Caudovirales	Siphoviridae	Sap6virus	199_0	Clustered	4	VC_199_0	4	0.8763	0.999944	0.8762	2	1	1	1
Enterococcus~phage~ECP3	RefSeq-85	Caudovirales	Myoviridae	Ef24cvirus	102_0	Clustered	3	VC_102_0	3	0.0572	0.998524	0.0571	1	1	1	1
Enterococcus~phage~Ec-ZZ2	RefSeq-85	Unassigned	Unassigned	Unassigned	219_0	Clustered	8	VC_219_0	8	0.7002	1	0.7002	1	2	2	1
Enterococcus~phage~EF62phi	RefSeq-85	Unassigned	Unassigned	Unassigned		Outlier
Enterococcus~phage~EfaCPT1	RefSeq-85	Caudovirales	Siphoviridae	Unassigned	219_0	Clustered	8	VC_219_0	8	0.7002	1	0.7002	1	2	2	1
Enterococcus~phage~EFAP-1	RefSeq-85	Caudovirales	Siphoviridae	Unassigned		Outlier
Enterococcus~phage~EFC-1	RefSeq-85	Caudovirales	Siphoviridae	Unassigned		Outlier
Enterococcus~phage~EFLK1	RefSeq-85	Caudovirales	Myoviridae	Ef24cvirus	102_0	Clustered	3	VC_102_0	3	0.0572	0.998524	0.0571	1	1	1	1
Enterococcus~phage~EFRM31	RefSeq-85	Caudovirales	Siphoviridae	Unassigned		Outlier
Enterococcus~phage~IME_EF3	RefSeq-85	Caudovirales	Siphoviridae	Unassigned	219_0	Clustered	8	VC_219_0	8	0.7002	1	0.7002	1	2	2	1
Enterococcus~phage~IME-EF4	RefSeq-85	Caudovirales	Siphoviridae	Unassigned	219_0	Clustered	8	VC_219_0	8	0.7002	1	0.7002	1	2	2	1
Enterococcus~phage~IME-EFm1	RefSeq-85	Caudovirales	Siphoviridae	Unassigned	219_0	Clustered	8	VC_219_0	8	0.7002	1	0.7002	1	2	2	1
Enterococcus~phage~IME-EFm5	RefSeq-85	Caudovirales	Siphoviridae	Unassigned	219_0	Clustered	8	VC_219_0	8	0.7002	1	0.7002	1	2	2	1
Enterococcus~phage~phiEf11	RefSeq-85	Caudovirales	Siphoviridae	Unassigned	160_0	Clustered	2	VC_160_0	2	0.1072	0.955811	0.1025	1	1	1	1
Enterococcus~phage~phiEF24C	RefSeq-85	Caudovirales	Myoviridae	Ef24cvirus	102_0	Clustered	3	VC_102_0	3	0.0572	0.998524	0.0571	1	1	1	1
Enterococcus~phage~phiFL1A	RefSeq-85	Caudovirales	Siphoviridae	Phifelvirus	119_0	Clustered	3	VC_119_0	3	0.3066	0.998309	0.3061	1	1	1	1
Enterococcus~phage~phiFL2A	RefSeq-85	Caudovirales	Siphoviridae	Phifelvirus	119_0	Clustered	3	VC_119_0	3	0.3066	0.998309	0.3061	1	1	1	1
Enterococcus~phage~phiFL3A	RefSeq-85	Caudovirales	Siphoviridae	Phifelvirus	119_0	Clustered	3	VC_119_0	3	0.3066	0.998309	0.3061	1	1	1	1
Enterococcus~phage~phiFL4A	RefSeq-85	Caudovirales	Siphoviridae	Unassigned		Outlier
Enterococcus~phage~SANTOR1	RefSeq-85	Unassigned	Unassigned	Unassigned	219_0	Clustered	8	VC_219_0	8	0.7002	1	0.7002	1	2	2	1
Enterococcus~phage~vB_Efae230P-4	RefSeq-85	Caudovirales	Podoviridae	Unassigned	220_0	Clustered	2	VC_220_0	2	0.2547	0.942612	0.2401	1	1	1	1
Enterococcus~phage~vB_EfaP_IME195	RefSeq-85	Caudovirales	Podoviridae	Unassigned	220_0	Clustered	2	VC_220_0	2	0.2547	0.942612	0.2401	1	1	1	1
Enterococcus~phage~vB_EfaS_IME196	RefSeq-85	Caudovirales	Siphoviridae	Unassigned	219_0	Clustered	8	VC_219_0	8	0.7002	1	0.7002	1	2	2	1
Enterococcus~phage~vB_EfaS_IME197	RefSeq-85	Caudovirales	Siphoviridae	Unassigned	160_0	Clustered	2	VC_160_0	2	0.1072	0.955811	0.1025	1	1	1	1
Enterococcus~phage~vB_EfaS_IME198	RefSeq-85	Caudovirales	Siphoviridae	Unassigned	199_0	Clustered	4	VC_199_0	4	0.8763	0.999944	0.8762	2	1	1	1
Enterococcus~phage~VD13	RefSeq-85	Caudovirales	Siphoviridae	Sap6virus	199_0	Clustered	4	VC_199_0	4	0.8763	0.999944	0.8762	2	1	1	1
Erwinia~amylovora~phage~Era103	RefSeq-85	Caudovirales	Podoviridae	Sp6virus	30_0	Clustered	15	VC_30_0	15	0.4346	1	0.4346	2	2	2	1
Erwinia~phage~Ea35-70	RefSeq-85	Caudovirales	Myoviridae	Agrican357virus		Outlier
Erwinia~phage~Ea9-2	RefSeq-85	Caudovirales	Podoviridae	Ea92virus	6_0	Clustered	2	VC_6_0	2	0.068	0.954115	0.0649	1	1	1	1
Erwinia~phage~ENT90	RefSeq-85	Caudovirales	Myoviridae	Unassigned	69_0	Clustered	29	VC_69_0	29	0.804	1	0.804	2	1	1	1
Erwinia~phage~FE44	RefSeq-85	Caudovirales	Podoviridae	Unassigned	34_0	Clustered	57	VC_34_0	57	0.8041	1	0.8041	3	2	2	1
Erwinia~phage~PEp14	RefSeq-85	Caudovirales	Podoviridae	Unassigned		Outlier
Erwinia~phage~phiEa100	RefSeq-85	Caudovirales	Podoviridae	Unassigned	30_0	Clustered	15	VC_30_0	15	0.4346	1	0.4346	2	2	2	1
Erwinia~phage~phiEa104	RefSeq-85	Caudovirales	Myoviridae	Ea214virus	46_0	Clustered	2	VC_46_0	2	0.0676	0.955091	0.0645	1	1	1	1
Erwinia~phage~phiEa21-4	RefSeq-85	Caudovirales	Myoviridae	Ea214virus	46_0	Clustered	2	VC_46_0	2	0.0676	0.955091	0.0645	1	1	1	1
Erwinia~phage~phiEa2809	RefSeq-85	Caudovirales	Ackermannviridae	Unassigned	41_0	Clustered	2	VC_41_0	2	0.0174	0.957576	0.0166	1	1	1	1
Erwinia~phage~PhiEaH1	RefSeq-85	Caudovirales	Siphoviridae	Unassigned		Outlier
Erwinia~phage~phiEaH2	RefSeq-85	Caudovirales	Myoviridae	Eah2virus	205_1	Clustered	3	VC_205_1	3	0.1129	0.986585	0.1114	2	1	1	1
Erwinia~phage~phiEt88	RefSeq-85	Caudovirales	Myoviridae	Unassigned	73_0	Clustered	2	VC_73_0	2	0.0369	0.955179	0.0352	1	1	1	1
Erwinia~phage~vB_EamM_Asesino	RefSeq-85	Caudovirales	Myoviridae	Eah2virus	205_1	Clustered	3	VC_205_1	3	0.1129	0.986585	0.1114	2	1	1	1
Erwinia~phage~vB_EamM_Caitlin	RefSeq-85	Unassigned	Unassigned	Unassigned	205_2	Clustered	3	VC_205_2	3	0.1124	0.986596	0.1109	1	1	1	1
Erwinia~phage~vB_EamM_ChrisDB	RefSeq-85	Unassigned	Unassigned	Unassigned	205_2	Clustered	3	VC_205_2	3	0.1124	0.986596	0.1109	1	1	1	1
Erwinia~phage~vB_EamM_EarlPhillipIV	RefSeq-85	Unassigned	Unassigned	Unassigned	205_0	Clustered	3	VC_205_0	3	0.1208	0.997949	0.1206	1	2	2	1
Erwinia~phage~vB_EamM_Huxley	RefSeq-85	Unassigned	Unassigned	Unassigned	205_2	Clustered	3	VC_205_2	3	0.1124	0.986596	0.1109	1	1	1	1
Erwinia~phage~vB_EamM_Phobos	RefSeq-85	Unassigned	Unassigned	Unassigned	205_0	Clustered	3	VC_205_0	3	0.1208	0.997949	0.1206	1	2	2	1
Erwinia~phage~vB_EamM-Y2	RefSeq-85	Caudovirales	Myoviridae	Unassigned	53_0	Clustered	5	VC_53_0	5	0.9799	0.999938	0.9798	1	1	1	1
Erwinia~phage~vB_EamP_Frozen	RefSeq-85	Caudovirales	Podoviridae	Ea92virus	6_0	Clustered	2	VC_6_0	2	0.068	0.954115	0.0649	1	1	1	1
Erwinia~phage~vB_EamP-L1	RefSeq-85	Caudovirales	Podoviridae	Unassigned	34_0	Clustered	57	VC_34_0	57	0.8041	1	0.8041	3	2	2	1
Erwinia~phage~vB_EamP-S6	RefSeq-85	Caudovirales	Podoviridae	Unassigned		Outlier
Erysipelothrix~phage~SE-1	RefSeq-85	Caudovirales	Siphoviridae	Unassigned		Outlier
Escherichia~phage~121Q	RefSeq-85	Caudovirales	Myoviridae	Unassigned	39_0	Clustered	2	VC_39_0	2	0.0586	0.956772	0.056	1	1	1	1
Escherichia~phage~172-1	RefSeq-85	Caudovirales	Podoviridae	Phieco32virus	208_0	Clustered	6	VC_208_0	6	0.8681	1	0.8681	1	1	1	1
Escherichia~phage~4MG	RefSeq-85	Caudovirales	Myoviridae	Se1virus	57_1	Clustered	2	VC_57_1	2	0.0562	0.948867	0.0534	1	1	1	1
Escherichia~phage~64795_ec1	RefSeq-85	Unassigned	Unassigned	Unassigned	34_0	Clustered	57	VC_34_0	57	0.8041	1	0.8041	3	2	2	1
Escherichia~phage~ADB-2	RefSeq-85	Caudovirales	Siphoviridae	T1virus	170_0	Clustered	25	VC_170_0	25	0.8432	1	0.8432	6	2	2	0.9733
Escherichia~phage~APCEc01	RefSeq-85	Caudovirales	Myoviridae	Unassigned	35_12	Clustered	7	VC_35_12	7	0.0354	1	0.0354	2	2	2	1
Escherichia~phage~AR1	RefSeq-85	Caudovirales	Myoviridae	T4virus	35_13	Clustered	27	VC_35_13	27	0.1738	1	0.1738	2	2	2	1
Escherichia~phage~Bp4	RefSeq-85	Caudovirales	Podoviridae	G7cvirus	6_1	Clustered	10	VC_6_1	10	0.3866	1	0.3866	3	1	1	1
Escherichia~phage~CAjan	RefSeq-85	Caudovirales	Siphoviridae	Seuratvirus		Overlap (VC_15/VC_53)
Escherichia~phage~CICC~80001	RefSeq-85	Caudovirales	Podoviridae	Unassigned	34_0	Clustered	57	VC_34_0	57	0.8041	1	0.8041	3	2	2	1
Escherichia~phage~D108	RefSeq-85	Caudovirales	Myoviridae	Unassigned	174_0	Clustered	3	VC_174_0	3	0.4448	0.998304	0.4441	2	1	1	1
Escherichia~phage~e4/1c	RefSeq-85	Caudovirales	Siphoviridae	Rogue1virus	170_0	Clustered	25	VC_170_0	25	0.8432	1	0.8432	6	2	2	0.9733
Escherichia~phage~EB49	RefSeq-85	Caudovirales	Siphoviridae	Rogue1virus	170_0	Clustered	25	VC_170_0	25	0.8432	1	0.8432	6	2	2	0.9733
Escherichia~phage~EC6	RefSeq-85	Caudovirales	Myoviridae	Felixo1virus	16_0	Clustered	16	VC_16_0	16	0.8255	1	0.8255	4	2	2	1
Escherichia~phage~ECBP1	RefSeq-85	Caudovirales	Podoviridae	G7cvirus	6_1	Clustered	10	VC_6_1	10	0.3866	1	0.3866	3	1	1	1
Escherichia~phage~ECBP2	RefSeq-85	Caudovirales	Podoviridae	Phieco32virus	208_0	Clustered	6	VC_208_0	6	0.8681	1	0.8681	1	1	1	1
Escherichia~phage~ECBP5	RefSeq-85	Caudovirales	Podoviridae	Unassigned	30_0	Clustered	15	VC_30_0	15	0.4346	1	0.4346	2	2	2	1
Escherichia~phage~ECML-117	RefSeq-85	Caudovirales	Myoviridae	Unassigned		Outlier
Escherichia~phage~ECML-134	RefSeq-85	Caudovirales	Myoviridae	T4virus	35_13	Clustered	27	VC_35_13	27	0.1738	1	0.1738	2	2	2	1
Escherichia~phage~ECML-4	RefSeq-85	Caudovirales	Ackermannviridae	Vi1virus	41_1	Clustered	19	VC_41_1	19	0.4193	1	0.4193	5	1	1	0.8655
Escherichia~phage~EK99P-1	RefSeq-85	Caudovirales	Siphoviridae	Hk578virus	155_0	Clustered	10	VC_155_0	10	0.52	1	0.52	2	2	2	1
Escherichia~phage~Envy	RefSeq-85	Unassigned	Unassigned	Unassigned	155_0	Clustered	10	VC_155_0	10	0.52	1	0.52	2	2	2	1
Escherichia~phage~FFH2	RefSeq-85	Caudovirales	Myoviridae	V5virus		Overlap (VC_58/VC_60)
Escherichia~phage~FV3	RefSeq-85	Caudovirales	Myoviridae	V5virus		Overlap (VC_58/VC_60)
Escherichia~phage~Gluttony	RefSeq-85	Unassigned	Unassigned	Unassigned	155_0	Clustered	10	VC_155_0	10	0.52	1	0.52	2	2	2	1
Escherichia~phage~HK578	RefSeq-85	Caudovirales	Siphoviridae	Hk578virus	155_0	Clustered	10	VC_155_0	10	0.52	1	0.52	2	2	2	1
Escherichia~phage~HK639	RefSeq-85	Caudovirales	Siphoviridae	Unassigned		Outlier
Escherichia~phage~HK75	RefSeq-85	Caudovirales	Siphoviridae	Hk97virus	12_0	Clustered	12	VC_12_0	12	0.3022	1	0.3022	3	1	1	1
Escherichia~phage~HX01	RefSeq-85	Caudovirales	Myoviridae	Rb69virus	35_12	Clustered	7	VC_35_12	7	0.0354	1	0.0354	2	2	2	1
Escherichia~phage~HY01	RefSeq-85	Caudovirales	Myoviridae	T4virus	35_13	Clustered	27	VC_35_13	27	0.1738	1	0.1738	2	2	2	1
Escherichia~phage~HY02	RefSeq-85	Caudovirales	Myoviridae	Felixo1virus	16_0	Clustered	16	VC_16_0	16	0.8255	1	0.8255	4	2	2	1
Escherichia~phage~HY03	RefSeq-85	Unassigned	Unassigned	Unassigned	35_13	Clustered	27	VC_35_13	27	0.1738	1	0.1738	2	2	2	1
Escherichia~phage~ime09	RefSeq-85	Caudovirales	Myoviridae	T4virus	35_13	Clustered	27	VC_35_13	27	0.1738	1	0.1738	2	2	2	1
Escherichia~phage~IME11	RefSeq-85	Caudovirales	Podoviridae	G7cvirus	6_1	Clustered	10	VC_6_1	10	0.3866	1	0.3866	3	1	1	1
Escherichia~phage~JES2013	RefSeq-85	Caudovirales	Myoviridae	V5virus		Overlap (VC_58/VC_60)
Escherichia~phage~JH2	RefSeq-85	Caudovirales	Myoviridae	Felixo1virus	16_0	Clustered	16	VC_16_0	16	0.8255	1	0.8255	4	2	2	1
Escherichia~phage~JS98	RefSeq-85	Caudovirales	Myoviridae	Js98virus	35_9	Clustered	8	VC_35_9	8	0.0415	1	0.0415	2	2	2	1
Escherichia~phage~JSE	RefSeq-85	Caudovirales	Myoviridae	Rb49virus	35_14	Clustered	4	VC_35_14	4	0.0248	0.999988	0.0248	2	1	1	1
Escherichia~phage~K30	RefSeq-85	Caudovirales	Podoviridae	Kp32virus	34_0	Clustered	57	VC_34_0	57	0.8041	1	0.8041	3	2	2	1
Escherichia~phage~KBNP1711	RefSeq-85	Caudovirales	Podoviridae	Phieco32virus	208_0	Clustered	6	VC_208_0	6	0.8681	1	0.8681	1	1	1	1
Escherichia~phage~LM33_P1	RefSeq-85	Unassigned	Unassigned	Unassigned	34_0	Clustered	57	VC_34_0	57	0.8041	1	0.8041	3	2	2	1
Escherichia~phage~Lw1	RefSeq-85	Caudovirales	Myoviridae	Unassigned	35_11	Clustered	8	VC_35_11	8	0.0634	1	0.0634	1	2	2	1
Escherichia~phage~Min27	RefSeq-85	Caudovirales	Podoviridae	Nona33virus	71_1	Clustered	13	VC_71_1	13	0.5146	1	0.5146	4	1	1	0.8846
Escherichia~phage~MX01	RefSeq-85	Unassigned	Unassigned	Unassigned	35_9	Clustered	8	VC_35_9	8	0.0415	1	0.0415	2	2	2	1
Escherichia~phage~N4	RefSeq-85	Caudovirales	Podoviridae	N4virus	6_1	Clustered	10	VC_6_1	10	0.3866	1	0.3866	3	1	1	1
Escherichia~phage~NJ01	RefSeq-85	Caudovirales	Podoviridae	Phieco32virus	208_0	Clustered	6	VC_208_0	6	0.8681	1	0.8681	1	1	1	1
Escherichia~phage~P13374	RefSeq-85	Caudovirales	Podoviridae	Unassigned	71_1	Clustered	13	VC_71_1	13	0.5146	1	0.5146	4	1	1	0.8846
Escherichia~phage~P483	RefSeq-85	Caudovirales	Podoviridae	Unassigned	34_0	Clustered	57	VC_34_0	57	0.8041	1	0.8041	3	2	2	1
Escherichia~phage~P694	RefSeq-85	Caudovirales	Podoviridae	Unassigned	34_0	Clustered	57	VC_34_0	57	0.8041	1	0.8041	3	2	2	1
Escherichia~phage~PA2	RefSeq-85	Caudovirales	Podoviridae	Tl2011virus	71_1	Clustered	13	VC_71_1	13	0.5146	1	0.5146	4	1	1	0.8846
Escherichia~phage~PBECO~4	RefSeq-85	Caudovirales	Myoviridae	Unassigned	39_0	Clustered	2	VC_39_0	2	0.0586	0.956772	0.056	1	1	1	1
Escherichia~phage~PE3-1	RefSeq-85	Caudovirales	Podoviridae	Unassigned	34_0	Clustered	57	VC_34_0	57	0.8041	1	0.8041	3	2	2	1
Escherichia~phage~phAPEC8	RefSeq-85	Caudovirales	Myoviridae	Unassigned	58_0	Clustered	2	VC_58_0	2	0.1254	0.956808	0.12	1	1	1	1
Escherichia~phage~PhaxI	RefSeq-85	Caudovirales	Ackermannviridae	Cba120virus	41_1	Clustered	19	VC_41_1	19	0.4193	1	0.4193	5	1	1	0.8655
Escherichia~phage~phi191	RefSeq-85	Caudovirales	Podoviridae	Tl2011virus	71_1	Clustered	13	VC_71_1	13	0.5146	1	0.5146	4	1	1	0.8846
Escherichia~phage~phiKT	RefSeq-85	Caudovirales	Podoviridae	Unassigned	28_0	Clustered	10	VC_28_0	10	0.2287	1	0.2287	2	2	2	1
Escherichia~phage~phiV10	RefSeq-85	Caudovirales	Podoviridae	Epsilon15virus	148_0	Clustered	5	VC_148_0	5	0.6227	1	0.6227	2	2	2	1
Escherichia~phage~Pollock	RefSeq-85	Caudovirales	Podoviridae	Sp58virus		Outlier
Escherichia~phage~pro147	RefSeq-85	Caudovirales	Myoviridae	Unassigned	69_0	Clustered	29	VC_69_0	29	0.804	1	0.804	2	1	1	1
Escherichia~phage~pro483	RefSeq-85	Caudovirales	Myoviridae	Unassigned	69_0	Clustered	29	VC_69_0	29	0.804	1	0.804	2	1	1	1
Escherichia~phage~QL01	RefSeq-85	Caudovirales	Myoviridae	Js98virus	35_9	Clustered	8	VC_35_9	8	0.0415	1	0.0415	2	2	2	1
Escherichia~phage~Seurat	RefSeq-85	Caudovirales	Siphoviridae	Seuratvirus		Overlap (VC_15/VC_53)
Escherichia~phage~slur01	RefSeq-85	Caudovirales	Siphoviridae	Unassigned		Overlap (VC_15/VC_53)
Escherichia~phage~slur02	RefSeq-85	Caudovirales	Myoviridae	Unassigned	35_13	Clustered	27	VC_35_13	27	0.1738	1	0.1738	2	2	2	1
Escherichia~phage~slur05	RefSeq-85	Caudovirales	Siphoviridae	Unassigned	155_0	Clustered	10	VC_155_0	10	0.52	1	0.52	2	2	2	1
Escherichia~phage~slur07	RefSeq-85	Caudovirales	Myoviridae	Unassigned	35_13	Clustered	27	VC_35_13	27	0.1738	1	0.1738	2	2	2	1
Escherichia~phage~slur09	RefSeq-85	Caudovirales	Siphoviridae	T5virus	207_0	Clustered	14	VC_207_0	14	0.8522	1	0.8522	2	2	2	1
Escherichia~phage~slur14	RefSeq-85	Caudovirales	Myoviridae	Unassigned	35_13	Clustered	27	VC_35_13	27	0.1738	1	0.1738	2	2	2	1
Escherichia~phage~slur16	RefSeq-85	Caudovirales	Myoviridae	Unassigned		Overlap (VC_58/VC_60)
Escherichia~phage~Stx2~II	RefSeq-85	Caudovirales	Podoviridae	Nona33virus	71_0	Clustered	2	VC_71_0	2	0.0714	0.955807	0.0682	1	1	1	1
Escherichia~phage~SUSP1	RefSeq-85	Caudovirales	Myoviridae	Suspvirus	16_0	Clustered	16	VC_16_0	16	0.8255	1	0.8255	4	2	2	1
Escherichia~phage~SUSP2	RefSeq-85	Caudovirales	Myoviridae	Suspvirus	16_0	Clustered	16	VC_16_0	16	0.8255	1	0.8255	4	2	2	1
Escherichia~phage~TL-2011b	RefSeq-85	Caudovirales	Podoviridae	Unassigned	148_0	Clustered	5	VC_148_0	5	0.6227	1	0.6227	2	2	2	1
Escherichia~phage~TL-2011c	RefSeq-85	Caudovirales	Podoviridae	Tl2011virus	71_1	Clustered	13	VC_71_1	13	0.5146	1	0.5146	4	1	1	0.8846
Escherichia~phage~UFV-AREG1	RefSeq-85	Unassigned	Unassigned	Unassigned	35_13	Clustered	27	VC_35_13	27	0.1738	1	0.1738	2	2	2	1
Escherichia~phage~V5	RefSeq-85	Caudovirales	Myoviridae	V5virus		Overlap (VC_58/VC_60)
Escherichia~phage~vB_Eco_ACG-M12	RefSeq-85	Caudovirales	Siphoviridae	Rtpvirus	170_0	Clustered	25	VC_170_0	25	0.8432	1	0.8432	6	2	2	0.9733
Escherichia~phage~vB_EcoM_112	RefSeq-85	Caudovirales	Myoviridae	T4virus	35_13	Clustered	27	VC_35_13	27	0.1738	1	0.1738	2	2	2	1
Escherichia~phage~vB_EcoM_ACG-C40	RefSeq-85	Caudovirales	Myoviridae	T4virus	35_13	Clustered	27	VC_35_13	27	0.1738	1	0.1738	2	2	2	1
Escherichia~phage~vB_EcoM_Alf5	RefSeq-85	Unassigned	Unassigned	Unassigned	16_0	Clustered	16	VC_16_0	16	0.8255	1	0.8255	4	2	2	1
Escherichia~phage~vB_EcoM_AYO145A	RefSeq-85	Caudovirales	Myoviridae	Felixo1virus	16_0	Clustered	16	VC_16_0	16	0.8255	1	0.8255	4	2	2	1
Escherichia~phage~vB_EcoM_ECO1230-10	RefSeq-85	Caudovirales	Myoviridae	Cvm10virus	89_0	Clustered	4	VC_89_0	4	0.2533	0.999984	0.2533	2	2	2	1
Escherichia~phage~vB_EcoM_JS09	RefSeq-85	Caudovirales	Myoviridae	Rb69virus	35_12	Clustered	7	VC_35_12	7	0.0354	1	0.0354	2	2	2	1
Escherichia~phage~vB_EcoM_PhAPEC2	RefSeq-85	Caudovirales	Myoviridae	Unassigned	35_12	Clustered	7	VC_35_12	7	0.0354	1	0.0354	2	2	2	1
Escherichia~phage~vB_EcoM_VR20	RefSeq-85	Caudovirales	Myoviridae	Sp18virus	35_10	Clustered	5	VC_35_10	5	0.0236	0.999985	0.0236	1	1	1	1
Escherichia~phage~vB_EcoM_VR25	RefSeq-85	Caudovirales	Myoviridae	Sp18virus	35_10	Clustered	5	VC_35_10	5	0.0236	0.999985	0.0236	1	1	1	1
Escherichia~phage~vB_EcoM_VR26	RefSeq-85	Caudovirales	Myoviridae	Sp18virus	35_10	Clustered	5	VC_35_10	5	0.0236	0.999985	0.0236	1	1	1	1
Escherichia~phage~vB_EcoM_VR7	RefSeq-85	Caudovirales	Myoviridae	Sp18virus	35_10	Clustered	5	VC_35_10	5	0.0236	0.999985	0.0236	1	1	1	1
Escherichia~phage~vB_EcoM-ep3	RefSeq-85	Caudovirales	Myoviridae	Cvm10virus	89_0	Clustered	4	VC_89_0	4	0.2533	0.999984	0.2533	2	2	2	1
Escherichia~phage~vB_EcoM-UFV13	RefSeq-85	Unassigned	Unassigned	Unassigned	35_13	Clustered	27	VC_35_13	27	0.1738	1	0.1738	2	2	2	1
Escherichia~phage~vB_EcoM-VpaE1	RefSeq-85	Caudovirales	Myoviridae	Felixo1virus	16_0	Clustered	16	VC_16_0	16	0.8255	1	0.8255	4	2	2	1
Escherichia~phage~vB_EcoP_24B	RefSeq-85	Caudovirales	Podoviridae	Nona33virus	71_1	Clustered	13	VC_71_1	13	0.5146	1	0.5146	4	1	1	0.8846
Escherichia~phage~vB_EcoP_G7C	RefSeq-85	Caudovirales	Podoviridae	G7cvirus	6_1	Clustered	10	VC_6_1	10	0.3866	1	0.3866	3	1	1	1
Escherichia~phage~vB_EcoP_GA2A	RefSeq-85	Unassigned	Unassigned	Unassigned	34_0	Clustered	57	VC_34_0	57	0.8041	1	0.8041	3	2	2	1
Escherichia~phage~vB_EcoP_PhAPEC5	RefSeq-85	Caudovirales	Podoviridae	G7cvirus	6_1	Clustered	10	VC_6_1	10	0.3866	1	0.3866	3	1	1	1
Escherichia~phage~vB_EcoP_PhAPEC7	RefSeq-85	Caudovirales	Podoviridae	G7cvirus	6_1	Clustered	10	VC_6_1	10	0.3866	1	0.3866	3	1	1	1
Escherichia~phage~vB_EcoP_SU10	RefSeq-85	Caudovirales	Podoviridae	Phieco32virus	208_0	Clustered	6	VC_208_0	6	0.8681	1	0.8681	1	1	1	1
Escherichia~phage~vB_EcoS_AHP42	RefSeq-85	Caudovirales	Siphoviridae	Rogue1virus	170_0	Clustered	25	VC_170_0	25	0.8432	1	0.8432	6	2	2	0.9733
Escherichia~phage~vB_EcoS_AHS24	RefSeq-85	Caudovirales	Siphoviridae	Rogue1virus	170_0	Clustered	25	VC_170_0	25	0.8432	1	0.8432	6	2	2	0.9733
Escherichia~phage~vB_EcoS_AKS96	RefSeq-85	Caudovirales	Siphoviridae	Rogue1virus	170_0	Clustered	25	VC_170_0	25	0.8432	1	0.8432	6	2	2	0.9733
Escherichia~phage~vB_EcoS_FFH1	RefSeq-85	Caudovirales	Siphoviridae	T5virus	207_0	Clustered	14	VC_207_0	14	0.8522	1	0.8522	2	2	2	1
Escherichia~phage~WG01	RefSeq-85	Unassigned	Unassigned	Unassigned	35_9	Clustered	8	VC_35_9	8	0.0415	1	0.0415	2	2	2	1
Escherichia~phage~wV7	RefSeq-85	Caudovirales	Myoviridae	Unassigned	35_13	Clustered	27	VC_35_13	27	0.1738	1	0.1738	2	2	2	1
Escherichia~phage~wV8	RefSeq-85	Caudovirales	Myoviridae	Felixo1virus	16_0	Clustered	16	VC_16_0	16	0.8255	1	0.8255	4	2	2	1
Escherichia~phage~YD-2008.s	RefSeq-85	Caudovirales	Siphoviridae	Hk578virus	155_0	Clustered	10	VC_155_0	10	0.52	1	0.52	2	2	2	1
Escherichia~Stx1~converting~phage	RefSeq-85	Caudovirales	Podoviridae	Nona33virus	71_0	Clustered	2	VC_71_0	2	0.0714	0.955807	0.0682	1	1	1	1
Escherichia~virus~186	RefSeq-85	Caudovirales	Myoviridae	P2virus	69_0	Clustered	29	VC_69_0	29	0.804	1	0.804	2	1	1	1
Escherichia~virus~AKFV33	RefSeq-85	Caudovirales	Siphoviridae	T5virus	207_0	Clustered	14	VC_207_0	14	0.8522	1	0.8522	2	2	2	1
Escherichia~virus~BZ13	RefSeq-85	Unassigned	Leviviridae	Levivirus	216_0	Clustered	2	VC_216_0	2	0.3205	0.997787	0.3198	1	1	1	1
Escherichia~virus~CBA120	RefSeq-85	Caudovirales	Ackermannviridae	Cba120virus	41_1	Clustered	19	VC_41_1	19	0.4193	1	0.4193	5	1	1	0.8655
Escherichia~virus~DT57C	RefSeq-85	Caudovirales	Siphoviridae	T5virus	207_0	Clustered	14	VC_207_0	14	0.8522	1	0.8522	2	2	2	1
Escherichia~virus~EPS7	RefSeq-85	Caudovirales	Siphoviridae	T5virus	207_0	Clustered	14	VC_207_0	14	0.8522	1	0.8522	2	2	2	1
Escherichia~virus~FI	RefSeq-85	Unassigned	Leviviridae	Allolevivirus	33_0	Clustered	3	VC_33_0	3	0.7023	0.996222	0.6996	2	1	1	1
Escherichia~virus~HK022	RefSeq-85	Caudovirales	Siphoviridae	HK97virus		Outlier
Escherichia~virus~HK97	RefSeq-85	Caudovirales	Siphoviridae	HK97virus	12_0	Clustered	12	VC_12_0	12	0.3022	1	0.3022	3	1	1	1
Escherichia~virus~I22	RefSeq-85	Unassigned	Inoviridae	Lineavirus	217_0	Clustered	2	VC_217_0	2	0.3882	0.827111	0.3211	1	1	1	1
Escherichia~virus~JL1	RefSeq-85	Caudovirales	Siphoviridae	Hk578virus	155_0	Clustered	10	VC_155_0	10	0.52	1	0.52	2	2	2	1
Escherichia~virus~K1-5	RefSeq-85	Caudovirales	Podoviridae	Sp6virus	30_0	Clustered	15	VC_30_0	15	0.4346	1	0.4346	2	2	2	1
Escherichia~virus~K1E	RefSeq-85	Caudovirales	Podoviridae	Sp6virus	30_0	Clustered	15	VC_30_0	15	0.4346	1	0.4346	2	2	2	1
Escherichia~virus~KP26	RefSeq-85	Caudovirales	Siphoviridae	Rogue1virus	170_0	Clustered	25	VC_170_0	25	0.8432	1	0.8432	6	2	2	0.9733
Escherichia~virus~Lambda	RefSeq-85	Caudovirales	Siphoviridae	Lambdavirus		Overlap (VC_13/VC_173)
Escherichia~virus~M13	RefSeq-85	Unassigned	Inoviridae	Inovirus	218_0	Clustered	3	VC_218_0	3	0.7193	0.963901	0.6933	2	1	1	1
Escherichia~virus~MS2	RefSeq-85	Unassigned	Leviviridae	Levivirus	216_0	Clustered	2	VC_216_0	2	0.3205	0.997787	0.3198	1	1	1	1
Escherichia~virus~Mu	RefSeq-85	Caudovirales	Myoviridae	Muvirus	174_0	Clustered	3	VC_174_0	3	0.4448	0.998304	0.4441	2	1	1	1
Escherichia~virus~N15	RefSeq-85	Caudovirales	Siphoviridae	N15virus		Overlap (VC_75/VC_173)
Escherichia~virus~P1	RefSeq-85	Caudovirales	Myoviridae	P1virus	222_0	Clustered	2	VC_222_0	2	1	1	1	2	2	2	1
Escherichia~virus~P2	RefSeq-85	Caudovirales	Myoviridae	P2virus	69_0	Clustered	29	VC_69_0	29	0.804	1	0.804	2	1	1	1
Escherichia~virus~phiEco32	RefSeq-85	Caudovirales	Podoviridae	Phieco32virus	208_0	Clustered	6	VC_208_0	6	0.8681	1	0.8681	1	1	1	1
Escherichia~virus~phiK	RefSeq-85	Unassigned	Microviridae	Alpha3microvirus	212_0	Clustered	8	VC_212_0	8	0.9651	0.999991	0.965	4	1	1	1
Escherichia~virus~Qbeta	RefSeq-85	Unassigned	Leviviridae	Allolevivirus	33_0	Clustered	3	VC_33_0	3	0.7023	0.996222	0.6996	2	1	1	1
Escherichia~virus~Rtp	RefSeq-85	Caudovirales	Siphoviridae	Rtpvirus	170_0	Clustered	25	VC_170_0	25	0.8432	1	0.8432	6	2	2	0.9733
Escherichia~virus~SSL2009a	RefSeq-85	Caudovirales	Siphoviridae	Hk578virus	155_0	Clustered	10	VC_155_0	10	0.52	1	0.52	2	2	2	1
Escherichia~virus~T1	RefSeq-85	Caudovirales	Siphoviridae	T1virus	170_0	Clustered	25	VC_170_0	25	0.8432	1	0.8432	6	2	2	0.9733
Escherichia~virus~T5	RefSeq-85	Caudovirales	Siphoviridae	T5virus	207_0	Clustered	14	VC_207_0	14	0.8522	1	0.8522	2	2	2	1
Escherichia~virus~TLS	RefSeq-85	Caudovirales	Siphoviridae	Tlsvirus	170_0	Clustered	25	VC_170_0	25	0.8432	1	0.8432	6	2	2	0.9733
Flavobacterium~phage~11b	RefSeq-85	Caudovirales	Siphoviridae	Unassigned		Outlier
Flavobacterium~phage~1H	RefSeq-85	Unassigned	Unassigned	Unassigned	224_0	Clustered	3	VC_224_0	3	0.9891	0.959572	0.9491	1	1	1	1
Flavobacterium~phage~2A	RefSeq-85	Unassigned	Unassigned	Unassigned	224_0	Clustered	3	VC_224_0	3	0.9891	0.959572	0.9491	1	1	1	1
Flavobacterium~phage~6H	RefSeq-85	Unassigned	Unassigned	Unassigned	224_0	Clustered	3	VC_224_0	3	0.9891	0.959572	0.9491	1	1	1	1
Flavobacterium~phage~FCL-2	RefSeq-85	Caudovirales	Myoviridae	Unassigned	173_0	Clustered	2	VC_173_0	2	0.7457	0.904785	0.6747	1	1	1	1
Flavobacterium~phage~Fpv1	RefSeq-85	Unassigned	Unassigned	Unassigned	189_0	Clustered	4	VC_189_0	4	0.9503	0.998845	0.9492	1	1	1	1
Flavobacterium~phage~Fpv10	RefSeq-85	Unassigned	Unassigned	Unassigned	153_0	Clustered	6	VC_153_0	6	0.9663	1	0.9663	1	1	1	1
Flavobacterium~phage~Fpv11	RefSeq-85	Unassigned	Unassigned	Unassigned	153_0	Clustered	6	VC_153_0	6	0.9663	1	0.9663	1	1	1	1
Flavobacterium~phage~Fpv2	RefSeq-85	Unassigned	Unassigned	Unassigned	189_0	Clustered	4	VC_189_0	4	0.9503	0.998845	0.9492	1	1	1	1
Flavobacterium~phage~Fpv20	RefSeq-85	Unassigned	Unassigned	Unassigned	189_0	Clustered	4	VC_189_0	4	0.9503	0.998845	0.9492	1	1	1	1
Flavobacterium~phage~Fpv3	RefSeq-85	Unassigned	Unassigned	Unassigned	189_0	Clustered	4	VC_189_0	4	0.9503	0.998845	0.9492	1	1	1	1
Flavobacterium~phage~Fpv5	RefSeq-85	Unassigned	Unassigned	Unassigned	153_0	Clustered	6	VC_153_0	6	0.9663	1	0.9663	1	1	1	1
Flavobacterium~phage~Fpv6	RefSeq-85	Unassigned	Unassigned	Unassigned	153_0	Clustered	6	VC_153_0	6	0.9663	1	0.9663	1	1	1	1
Flavobacterium~phage~Fpv7	RefSeq-85	Unassigned	Unassigned	Unassigned	153_0	Clustered	6	VC_153_0	6	0.9663	1	0.9663	1	1	1	1
Flavobacterium~phage~Fpv8	RefSeq-85	Unassigned	Unassigned	Unassigned	153_0	Clustered	6	VC_153_0	6	0.9663	1	0.9663	1	1	1	1
Geobacillus~phage~GBK2	RefSeq-85	Caudovirales	Siphoviridae	Unassigned	120_0	Clustered	2	VC_120_0	2	0.0942	0.952603	0.0898	1	1	1	1
Geobacillus~phage~GBSV1	RefSeq-85	Caudovirales	Myoviridae	Svunavirus	117_0	Clustered	2	VC_117_0	2	0.271	0.952556	0.2582	1	1	1	1
Geobacillus~virus~E2	RefSeq-85	Unassigned	Unassigned	Unassigned		Outlier
Gokushovirinae~Bog1183_53	RefSeq-85	Unassigned	Microviridae	Unassigned	154_0	Clustered	12	VC_154_0	12	0.8784	1	0.8784	3	2	1	1
Gokushovirinae~Bog5712_52	RefSeq-85	Unassigned	Microviridae	Unassigned	154_0	Clustered	12	VC_154_0	12	0.8784	1	0.8784	3	2	1	1
Gokushovirinae~Bog8989_22	RefSeq-85	Unassigned	Microviridae	Unassigned	154_0	Clustered	12	VC_154_0	12	0.8784	1	0.8784	3	2	1	1
Gokushovirinae~Fen672_31	RefSeq-85	Unassigned	Microviridae	Unassigned	154_0	Clustered	12	VC_154_0	12	0.8784	1	0.8784	3	2	1	1
Gokushovirinae~Fen7875_21	RefSeq-85	Unassigned	Microviridae	Unassigned	154_0	Clustered	12	VC_154_0	12	0.8784	1	0.8784	3	2	1	1
Gokushovirinae~GAIR4	RefSeq-85	Unassigned	Microviridae	Unassigned		Singleton
Gokushovirinae~GNX3R	RefSeq-85	Unassigned	Microviridae	Unassigned		Singleton
Gordonia~phage~Bachita	RefSeq-85	Caudovirales	Siphoviridae	Smoothievirus	226_0	Clustered	4	VC_226_0	4	0.493	0.99998	0.493	2	2	2	1
Gordonia~phage~Bantam	RefSeq-85	Unassigned	Unassigned	Unassigned		Outlier
Gordonia~phage~BaxterFox	RefSeq-85	Caudovirales	Siphoviridae	Baxtervirus	235_0	Clustered	5	VC_235_0	5	0.506	1	0.506	2	1	1	1
Gordonia~phage~BetterKatz	RefSeq-85	Unassigned	Unassigned	Unassigned		Outlier
Gordonia~phage~Blueberry	RefSeq-85	Unassigned	Unassigned	Unassigned	236_0	Clustered	7	VC_236_0	7	0.6927	1	0.6927	1	1	1	1
Gordonia~phage~Bowser	RefSeq-85	Unassigned	Unassigned	Unassigned	231_0	Clustered	3	VC_231_0	3	0.2672	0.998142	0.2667	1	1	1	1
Gordonia~phage~BritBrat	RefSeq-85	Unassigned	Unassigned	Unassigned	85_0	Clustered	2	VC_85_0	2	0.1017	0.954534	0.0971	1	1	1	0
Gordonia~phage~CaptainKirk2	RefSeq-85	Unassigned	Unassigned	Unassigned	236_0	Clustered	7	VC_236_0	7	0.6927	1	0.6927	1	1	1	1
Gordonia~phage~CarolAnn	RefSeq-85	Unassigned	Unassigned	Unassigned	236_0	Clustered	7	VC_236_0	7	0.6927	1	0.6927	1	1	1	1
Gordonia~phage~ClubL	RefSeq-85	Caudovirales	Siphoviridae	Smoothievirus	226_0	Clustered	4	VC_226_0	4	0.493	0.99998	0.493	2	2	2	1
Gordonia~phage~Cozz	RefSeq-85	Unassigned	Unassigned	Unassigned		Overlap (VC_241/VC_245)
Gordonia~phage~Cucurbita	RefSeq-85	Unassigned	Unassigned	Unassigned	226_0	Clustered	4	VC_226_0	4	0.493	0.99998	0.493	2	2	2	1
Gordonia~phage~Demosthenes	RefSeq-85	Caudovirales	Siphoviridae	Demosthenesvirus	249_0	Clustered	2	VC_249_0	2	0.1266	0.946688	0.1199	1	1	1	1
Gordonia~phage~Emalyn	RefSeq-85	Unassigned	Unassigned	Unassigned		Overlap (VC_241/VC_245)
Gordonia~phage~Eyre	RefSeq-85	Unassigned	Unassigned	Unassigned		Outlier
Gordonia~phage~GAL1	RefSeq-85	Unassigned	Unassigned	Unassigned	85_0	Clustered	2	VC_85_0	2	0.1017	0.954534	0.0971	1	1	1	0
Gordonia~phage~Ghobes	RefSeq-85	Unassigned	Unassigned	Unassigned		Outlier
Gordonia~phage~GMA1	RefSeq-85	Unassigned	Unassigned	Unassigned	237_0	Clustered	2	VC_237_0	2	0.0716	0.95532	0.0684	1	1	1	1
Gordonia~phage~GMA3	RefSeq-85	Caudovirales	Podoviridae	Unassigned	248_0	Clustered	5	VC_248_0	5	0.5173	1	0.5173	2	3	2	1
Gordonia~phage~GMA4	RefSeq-85	Unassigned	Unassigned	Unassigned		Outlier
Gordonia~phage~GMA5	RefSeq-85	Unassigned	Unassigned	Unassigned	81_0	Clustered	4	VC_81_0	4	0.8151	0.992893	0.8093	1	2	2	1
Gordonia~phage~GMA6	RefSeq-85	Unassigned	Unassigned	Unassigned		Outlier
Gordonia~phage~GMA7	RefSeq-85	Caudovirales	Podoviridae	Unassigned	249_1	Clustered	7	VC_249_1	7	0.5478	1	0.5478	3	2	1	0.619
Gordonia~phage~Gmala1	RefSeq-85	Caudovirales	Siphoviridae	Unassigned	248_0	Clustered	5	VC_248_0	5	0.5173	1	0.5173	2	3	2	1
Gordonia~phage~GordDuk1	RefSeq-85	Caudovirales	Siphoviridae	Unassigned	248_0	Clustered	5	VC_248_0	5	0.5173	1	0.5173	2	3	2	1
Gordonia~phage~GordTnk2	RefSeq-85	Caudovirales	Siphoviridae	Gordtnkvirus	248_0	Clustered	5	VC_248_0	5	0.5173	1	0.5173	2	3	2	1
Gordonia~phage~GRU1	RefSeq-85	Caudovirales	Siphoviridae	Unassigned	202_0	Clustered	3	VC_202_0	3	0.785	0.997761	0.7832	1	2	1	1
Gordonia~phage~GRU3	RefSeq-85	Unassigned	Unassigned	Unassigned	81_0	Clustered	4	VC_81_0	4	0.8151	0.992893	0.8093	1	2	2	1
Gordonia~phage~Gsput1	RefSeq-85	Unassigned	Unassigned	Unassigned	201_0	Clustered	3	VC_201_0	3	0.8363	0.996171	0.8331	2	2	2	1
Gordonia~phage~GTE2	RefSeq-85	Caudovirales	Siphoviridae	Unassigned		Overlap (VC_241/VC_245)
Gordonia~phage~GTE5	RefSeq-85	Caudovirales	Siphoviridae	Unassigned	202_0	Clustered	3	VC_202_0	3	0.785	0.997761	0.7832	1	2	1	1
Gordonia~phage~GTE6	RefSeq-85	Caudovirales	Podoviridae	Unassigned	64_0	Clustered	3	VC_64_0	3	0.2114	0.99844	0.2111	1	2	2	1
Gordonia~phage~GTE7	RefSeq-85	Caudovirales	Siphoviridae	Unassigned	249_1	Clustered	7	VC_249_1	7	0.5478	1	0.5478	3	2	1	0.619
Gordonia~phage~GTE8	RefSeq-85	Caudovirales	Podoviridae	Unassigned	202_0	Clustered	3	VC_202_0	3	0.785	0.997761	0.7832	1	2	1	1
Gordonia~phage~Guacamole	RefSeq-85	Unassigned	Unassigned	Unassigned	236_0	Clustered	7	VC_236_0	7	0.6927	1	0.6927	1	1	1	1
Gordonia~phage~Hedwig	RefSeq-85	Unassigned	Unassigned	Unassigned	231_0	Clustered	3	VC_231_0	3	0.2672	0.998142	0.2667	1	1	1	1
Gordonia~phage~Hotorobo	RefSeq-85	Caudovirales	Siphoviridae	Woesvirus	249_1	Clustered	7	VC_249_1	7	0.5478	1	0.5478	3	2	1	0.619
Gordonia~phage~JSwag	RefSeq-85	Unassigned	Unassigned	Unassigned		Overlap (VC_228/VC_231)
Gordonia~phage~Jumbo	RefSeq-85	Unassigned	Unassigned	Unassigned	248_0	Clustered	5	VC_248_0	5	0.5173	1	0.5173	2	3	2	1
Gordonia~phage~KatherineG	RefSeq-85	Unassigned	Unassigned	Unassigned		Overlap (VC_228/VC_231)
Gordonia~phage~Kita	RefSeq-85	Caudovirales	Siphoviridae	Nymphadoravirus	235_0	Clustered	5	VC_235_0	5	0.506	1	0.506	2	1	1	1
Gordonia~phage~Kvothe	RefSeq-85	Caudovirales	Siphoviridae	Demosthenesvirus	249_0	Clustered	2	VC_249_0	2	0.1266	0.946688	0.1199	1	1	1	1
Gordonia~phage~McGonagall	RefSeq-85	Unassigned	Unassigned	Unassigned	81_0	Clustered	4	VC_81_0	4	0.8151	0.992893	0.8093	1	2	2	1
Gordonia~phage~Monty	RefSeq-85	Caudovirales	Siphoviridae	Woesvirus	249_1	Clustered	7	VC_249_1	7	0.5478	1	0.5478	3	2	1	0.619
Gordonia~phage~Nyceirae	RefSeq-85	Unassigned	Unassigned	Unassigned		Outlier
Gordonia~phage~Nymphadora	RefSeq-85	Caudovirales	Siphoviridae	Nymphadoravirus	235_0	Clustered	5	VC_235_0	5	0.506	1	0.506	2	1	1	1
Gordonia~phage~Obliviate	RefSeq-85	Unassigned	Unassigned	Unassigned	236_0	Clustered	7	VC_236_0	7	0.6927	1	0.6927	1	1	1	1
Gordonia~phage~Orchid	RefSeq-85	Unassigned	Unassigned	Unassigned		Outlier
Gordonia~phage~Phinally	RefSeq-85	Unassigned	Unassigned	Unassigned	64_0	Clustered	3	VC_64_0	3	0.2114	0.99844	0.2111	1	2	2	1
Gordonia~phage~Remus	RefSeq-85	Unassigned	Unassigned	Unassigned		Overlap (VC_228/VC_231)
Gordonia~phage~Rosalind	RefSeq-85	Unassigned	Unassigned	Unassigned		Overlap (VC_228/VC_231)
Gordonia~phage~Schwabeltier	RefSeq-85	Unassigned	Unassigned	Unassigned	231_0	Clustered	3	VC_231_0	3	0.2672	0.998142	0.2667	1	1	1	1
Gordonia~phage~Smoothie	RefSeq-85	Caudovirales	Siphoviridae	Smoothievirus	226_0	Clustered	4	VC_226_0	4	0.493	0.99998	0.493	2	2	2	1
Gordonia~phage~SoilAssassin	RefSeq-85	Unassigned	Unassigned	Unassigned		Outlier
Gordonia~phage~Soups	RefSeq-85	Caudovirales	Siphoviridae	Soupsvirus		Overlap (VC_228/VC_231)
Gordonia~phage~Splinter	RefSeq-85	Caudovirales	Siphoviridae	Vendettavirus	201_0	Clustered	3	VC_201_0	3	0.8363	0.996171	0.8331	2	2	2	1
Gordonia~phage~Terapin	RefSeq-85	Unassigned	Unassigned	Unassigned		Outlier
Gordonia~phage~Twister6	RefSeq-85	Caudovirales	Siphoviridae	Wizardvirus		Overlap (VC_65/VC_66)
Gordonia~phage~UmaThurman	RefSeq-85	Unassigned	Unassigned	Unassigned	236_0	Clustered	7	VC_236_0	7	0.6927	1	0.6927	1	1	1	1
Gordonia~phage~Utz	RefSeq-85	Unassigned	Unassigned	Unassigned	236_0	Clustered	7	VC_236_0	7	0.6927	1	0.6927	1	1	1	1
Gordonia~phage~Vendetta	RefSeq-85	Caudovirales	Siphoviridae	Vendettavirus	201_0	Clustered	3	VC_201_0	3	0.8363	0.996171	0.8331	2	2	2	1
Gordonia~phage~Vivi2	RefSeq-85	Unassigned	Unassigned	Unassigned	64_0	Clustered	3	VC_64_0	3	0.2114	0.99844	0.2111	1	2	2	1
Gordonia~phage~Wizard	RefSeq-85	Caudovirales	Siphoviridae	Wizardvirus		Overlap (VC_65/VC_66)
Gordonia~phage~Woes	RefSeq-85	Caudovirales	Siphoviridae	Woesvirus	249_1	Clustered	7	VC_249_1	7	0.5478	1	0.5478	3	2	1	0.619
Gordonia~phage~Yeezy	RefSeq-85	Caudovirales	Siphoviridae	Baxtervirus	235_0	Clustered	5	VC_235_0	5	0.506	1	0.506	2	1	1	1
Gordonia~phage~Yvonnetastic	RefSeq-85	Unassigned	Unassigned	Unassigned		Outlier
Gordonia~phage~Zirinka	RefSeq-85	Caudovirales	Siphoviridae	Nymphadoravirus	235_0	Clustered	5	VC_235_0	5	0.506	1	0.506	2	1	1	1
Guinea~pig~Chlamydia~phage	RefSeq-85	Unassigned	Microviridae	Chlamydiamicrovirus	154_0	Clustered	12	VC_154_0	12	0.8784	1	0.8784	3	2	1	1
Haemophilus~phage~Aaphi23	RefSeq-85	Caudovirales	Myoviridae	Unassigned	4_0	Clustered	2	VC_4_0	2	0.4605	0.946883	0.436	1	2	2	1
Haemophilus~phage~HP1	RefSeq-85	Caudovirales	Myoviridae	Hp1virus	70_0	Clustered	7	VC_70_0	7	0.5714	1	0.5714	2	2	2	1
Haemophilus~phage~HP2	RefSeq-85	Caudovirales	Myoviridae	Hp1virus	70_0	Clustered	7	VC_70_0	7	0.5714	1	0.5714	2	2	2	1
Haemophilus~phage~SuMu	RefSeq-85	Caudovirales	Myoviridae	Unassigned		Outlier
Haloarcula~californiae~icosahedral~virus~1	RefSeq-85	Unassigned	Sphaerolipoviridae	Alphasphaerolipovirus	254_0	Clustered	4	VC_254_0	4	1	1	1	1	1	1	1
Haloarcula~hispanica~icosahedral~virus~2	RefSeq-85	Unassigned	Sphaerolipoviridae	Alphasphaerolipovirus	254_0	Clustered	4	VC_254_0	4	1	1	1	1	1	1	1
Haloarcula~hispanica~pleomorphic~virus~1	RefSeq-85	Unassigned	Pleolipoviridae	Alphapleolipovirus	255_0	Clustered	2	VC_255_0	2	0.5107	0.89435	0.4568	1	1	1	1
Haloarcula~hispanica~pleomorphic~virus~2	RefSeq-85	Unassigned	Pleolipoviridae	Alphapleolipovirus	255_0	Clustered	2	VC_255_0	2	0.5107	0.89435	0.4568	1	1	1	1
Haloarcula~hispanica~virus~PH1	RefSeq-85	Unassigned	Sphaerolipoviridae	Alphasphaerolipovirus	254_0	Clustered	4	VC_254_0	4	1	1	1	1	1	1	1
Haloarcula~hispanica~virus~SH1	RefSeq-85	Unassigned	Sphaerolipoviridae	Alphasphaerolipovirus	254_0	Clustered	4	VC_254_0	4	1	1	1	1	1	1	1
Halocynthia~phage~JM-2012	RefSeq-85	Caudovirales	Myoviridae	Unassigned		Outlier
Halogeometricum~pleomorphic~virus~1	RefSeq-85	Unassigned	Pleolipoviridae	Betapleolipovirus	257_0	Clustered	2	VC_257_0	2	1	1	1	1	1	1	1
Halomonas~phage~phiHAP-1	RefSeq-85	Caudovirales	Myoviridae	Hapunavirus	90_0	Clustered	2	VC_90_0	2	0.1485	0.953764	0.1417	1	1	1	1
Halorubrum~phage~CGphi46	RefSeq-85	Unassigned	Unassigned	Unassigned	79_0	Clustered	2	VC_79_0	2	0.7941	0.814453	0.6468	1	2	2	1
Halorubrum~phage~HF2	RefSeq-85	Unassigned	Myoviridae	Unassigned	258_0	Clustered	4	VC_258_0	4	0.7346	0.999558	0.7343	1	2	1	1
Halorubrum~pleomorphic~virus~1	RefSeq-85	Unassigned	Pleolipoviridae	Alphapleolipovirus		Overlap (VC_256/VC_257)
Halorubrum~pleomorphic~virus~2	RefSeq-85	Unassigned	Pleolipoviridae	Alphapleolipovirus		Overlap (VC_256/VC_257)
Halorubrum~pleomorphic~virus~3	RefSeq-85	Unassigned	Pleolipoviridae	Betapleolipovirus	257_0	Clustered	2	VC_257_0	2	1	1	1	1	1	1	1
Halorubrum~pleomorphic~virus~6	RefSeq-85	Unassigned	Pleolipoviridae	Alphapleolipovirus		Overlap (VC_256/VC_257)
Halovirus~HCTV-1	RefSeq-85	Unassigned	Siphoviridae	Unassigned	259_0	Clustered	3	VC_259_0	3	0.9009	0.981556	0.8842	1	1	1	1
Halovirus~HCTV-2	RefSeq-85	Unassigned	Unassigned	Unassigned	261_0	Clustered	2	VC_261_0	2	0.4752	0.89435	0.425	1	1	1	1
Halovirus~HCTV-5	RefSeq-85	Unassigned	Siphoviridae	Unassigned	259_0	Clustered	3	VC_259_0	3	0.9009	0.981556	0.8842	1	1	1	1
Halovirus~HF1	RefSeq-85	Unassigned	Myoviridae	Unassigned	258_0	Clustered	4	VC_258_0	4	0.7346	0.999558	0.7343	1	2	1	1
Halovirus~HGTV-1	RefSeq-85	Unassigned	Unassigned	Unassigned		Outlier
Halovirus~HHTV-1	RefSeq-85	Unassigned	Unassigned	Unassigned		Singleton
Halovirus~HHTV-2	RefSeq-85	Unassigned	Unassigned	Unassigned	261_0	Clustered	2	VC_261_0	2	0.4752	0.89435	0.425	1	1	1	1
Halovirus~HRTV-4	RefSeq-85	Unassigned	Unassigned	Unassigned		Outlier
Halovirus~HRTV-5	RefSeq-85	Unassigned	Unassigned	Unassigned	258_0	Clustered	4	VC_258_0	4	0.7346	0.999558	0.7343	1	2	1	1
Halovirus~HRTV-7	RefSeq-85	Unassigned	Unassigned	Unassigned		Overlap (VC_259/VC_261)
Halovirus~HRTV-8	RefSeq-85	Unassigned	Unassigned	Unassigned	258_0	Clustered	4	VC_258_0	4	0.7346	0.999558	0.7343	1	2	1	1
Halovirus~HSTV-1	RefSeq-85	Unassigned	Siphoviridae	Unassigned		Outlier
Halovirus~HSTV-2	RefSeq-85	Unassigned	Myoviridae	Unassigned		Overlap (VC_259/VC_261)
Halovirus~HVTV-1	RefSeq-85	Unassigned	Siphoviridae	Unassigned	259_0	Clustered	3	VC_259_0	3	0.9009	0.981556	0.8842	1	1	1	1
Halovirus~VNH-1	RefSeq-85	Unassigned	Unassigned	Unassigned		Singleton
Hamiltonella~virus~APSE1	RefSeq-85	Caudovirales	Podoviridae	Unassigned	149_0	Clustered	2	VC_149_0	2	0.1372	0.953172	0.1308	1	1	1	1
Helicobacter~phage~1961P	RefSeq-85	Caudovirales	Podoviridae	Una961virus	262_0	Clustered	4	VC_262_0	4	1	1	1	2	2	1	1
Helicobacter~phage~KHP30	RefSeq-85	Caudovirales	Podoviridae	Una961virus	262_0	Clustered	4	VC_262_0	4	1	1	1	2	2	1	1
Helicobacter~phage~KHP40	RefSeq-85	Caudovirales	Podoviridae	Una961virus	262_0	Clustered	4	VC_262_0	4	1	1	1	2	2	1	1
Helicobacter~phage~phiHP33	RefSeq-85	Caudovirales	Siphoviridae	Unassigned	262_0	Clustered	4	VC_262_0	4	1	1	1	2	2	1	1
His~1~virus	RefSeq-85	Unassigned	Unassigned	Salterprovirus		Singleton
His2~virus	RefSeq-85	Unassigned	Pleolipoviridae	Gammapleolipovirus		Outlier
Hydrogenobaculum~phage~1	RefSeq-85	Unassigned	Unassigned	Unassigned		Singleton
Hyperthermophilic~Archaeal~Virus~1	RefSeq-85	Unassigned	Unassigned	Unassigned		Singleton
Hyperthermophilic~Archaeal~Virus~2	RefSeq-85	Unassigned	Unassigned	Unassigned		Singleton
Idiomarinaceae~phage~1N2-2	RefSeq-85	Unassigned	Unassigned	Unassigned		Overlap (VC_6/VC_78)
Idiomarinaceae~phage~Phi1M2-2	RefSeq-85	Caudovirales	Siphoviridae	Unassigned	166_0	Clustered	3	VC_166_0	3	0.1512	0.978394	0.1479	1	2	1	1
Iodobacteriophage~phiPLPE	RefSeq-85	Caudovirales	Myoviridae	Unassigned	75_0	Clustered	6	VC_75_0	6	0.7487	1	0.7487	2	1	1	1
Klebsiella~phage~0507-KN2-1	RefSeq-85	Caudovirales	Ackermannviridae	Unassigned	41_1	Clustered	19	VC_41_1	19	0.4193	1	0.4193	5	1	1	0.8655
Klebsiella~phage~1513	RefSeq-85	Caudovirales	Siphoviridae	Kp36virus	170_0	Clustered	25	VC_170_0	25	0.8432	1	0.8432	6	2	2	0.9733
Klebsiella~phage~F19	RefSeq-85	Caudovirales	Podoviridae	Kp34virus	29_0	Clustered	9	VC_29_0	9	0.2985	1	0.2985	1	1	1	1
Klebsiella~phage~JD001	RefSeq-85	Caudovirales	Myoviridae	Unassigned	75_0	Clustered	6	VC_75_0	6	0.7487	1	0.7487	2	1	1	1
Klebsiella~phage~JD18	RefSeq-85	Caudovirales	Myoviridae	Jd18virus	35_6	Clustered	3	VC_35_6	3	0.0115	0.991748	0.0114	2	2	2	0.6667
Klebsiella~phage~K11	RefSeq-85	Caudovirales	Podoviridae	Kp32virus	34_0	Clustered	57	VC_34_0	57	0.8041	1	0.8041	3	2	2	1
Klebsiella~phage~K5	RefSeq-85	Caudovirales	Podoviridae	Kp32virus	34_0	Clustered	57	VC_34_0	57	0.8041	1	0.8041	3	2	2	1
Klebsiella~phage~K64-1	RefSeq-85	Caudovirales	Myoviridae	Unassigned		Outlier
Klebsiella~phage~KLPN1	RefSeq-85	Caudovirales	Siphoviridae	Kp36virus	170_0	Clustered	25	VC_170_0	25	0.8432	1	0.8432	6	2	2	0.9733
Klebsiella~phage~KP15	RefSeq-85	Caudovirales	Myoviridae	Kp15virus	35_0	Clustered	3	VC_35_0	3	0.0169	0.997983	0.0169	1	1	1	1
Klebsiella~phage~Kp2	RefSeq-85	Caudovirales	Podoviridae	Kp34virus	29_0	Clustered	9	VC_29_0	9	0.2985	1	0.2985	1	1	1	1
Klebsiella~phage~KP27	RefSeq-85	Caudovirales	Myoviridae	Kp15virus	35_0	Clustered	3	VC_35_0	3	0.0169	0.997983	0.0169	1	1	1	1
Klebsiella~phage~KP32	RefSeq-85	Caudovirales	Podoviridae	Kp32virus	34_0	Clustered	57	VC_34_0	57	0.8041	1	0.8041	3	2	2	1
Klebsiella~phage~KP34	RefSeq-85	Caudovirales	Podoviridae	Kp34virus	29_0	Clustered	9	VC_29_0	9	0.2985	1	0.2985	1	1	1	1
Klebsiella~phage~KP36	RefSeq-85	Caudovirales	Siphoviridae	Kp36virus	170_0	Clustered	25	VC_170_0	25	0.8432	1	0.8432	6	2	2	0.9733
Klebsiella~phage~KpV41	RefSeq-85	Caudovirales	Podoviridae	Kp34virus	29_0	Clustered	9	VC_29_0	9	0.2985	1	0.2985	1	1	1	1
Klebsiella~phage~KpV475	RefSeq-85	Caudovirales	Podoviridae	Kp34virus	29_0	Clustered	9	VC_29_0	9	0.2985	1	0.2985	1	1	1	1
Klebsiella~phage~KpV71	RefSeq-85	Caudovirales	Podoviridae	Kp34virus	29_0	Clustered	9	VC_29_0	9	0.2985	1	0.2985	1	1	1	1
Klebsiella~phage~Matisse	RefSeq-85	Caudovirales	Myoviridae	Kp15virus	35_0	Clustered	3	VC_35_0	3	0.0169	0.997983	0.0169	1	1	1	1
Klebsiella~phage~NTUH-K2044-K1-1	RefSeq-85	Caudovirales	Podoviridae	Kp34virus	29_0	Clustered	9	VC_29_0	9	0.2985	1	0.2985	1	1	1	1
Klebsiella~phage~phiKO2	RefSeq-85	Caudovirales	Siphoviridae	Unassigned		Outlier
Klebsiella~phage~PKO111	RefSeq-85	Caudovirales	Myoviridae	Jd18virus	35_6	Clustered	3	VC_35_6	3	0.0115	0.991748	0.0114	2	2	2	0.6667
Klebsiella~phage~PKP126	RefSeq-85	Caudovirales	Siphoviridae	Kp36virus	170_0	Clustered	25	VC_170_0	25	0.8432	1	0.8432	6	2	2	0.9733
Klebsiella~phage~Sushi	RefSeq-85	Caudovirales	Siphoviridae	Kp36virus	170_0	Clustered	25	VC_170_0	25	0.8432	1	0.8432	6	2	2	0.9733
Klebsiella~phage~vB_Kp1	RefSeq-85	Caudovirales	Podoviridae	Kp32virus	34_0	Clustered	57	VC_34_0	57	0.8041	1	0.8041	3	2	2	1
Klebsiella~phage~vB_KpnM_KpV477	RefSeq-85	Unassigned	Unassigned	Unassigned	35_6	Clustered	3	VC_35_6	3	0.0115	0.991748	0.0114	2	2	2	0.6667
Klebsiella~phage~vB_KpnP_KpV289	RefSeq-85	Caudovirales	Podoviridae	Kp32virus	34_0	Clustered	57	VC_34_0	57	0.8041	1	0.8041	3	2	2	1
Klebsiella~phage~vB_KpnP_SU503	RefSeq-85	Caudovirales	Podoviridae	Kp34virus	29_0	Clustered	9	VC_29_0	9	0.2985	1	0.2985	1	1	1	1
Klebsiella~phage~vB_KpnP_SU552A	RefSeq-85	Caudovirales	Podoviridae	Kp34virus	29_0	Clustered	9	VC_29_0	9	0.2985	1	0.2985	1	1	1	1
Kluyvera~phage~Kvp1	RefSeq-85	Caudovirales	Podoviridae	T7virus	34_0	Clustered	57	VC_34_0	57	0.8041	1	0.8041	3	2	2	1
Lactobacillus~phage~A2	RefSeq-85	Caudovirales	Siphoviridae	Unassigned	121_0	Clustered	6	VC_121_0	6	0.2674	1	0.2674	1	1	1	1
Lactobacillus~phage~CL1	RefSeq-85	Caudovirales	Siphoviridae	Unassigned		Overlap (VC_122/VC_146)
Lactobacillus~phage~CL2	RefSeq-85	Caudovirales	Siphoviridae	Unassigned		Overlap (VC_122/VC_146)
Lactobacillus~phage~iA2	RefSeq-85	Caudovirales	Siphoviridae	Unassigned	130_0	Clustered	2	VC_130_0	2	0.1423	0.954294	0.1358	1	2	2	1
Lactobacillus~phage~iLp1308	RefSeq-85	Caudovirales	Siphoviridae	Unassigned		Overlap (VC_122/VC_146)
Lactobacillus~phage~iLp84	RefSeq-85	Caudovirales	Siphoviridae	Unassigned		Overlap (VC_122/VC_146)
Lactobacillus~phage~J-1	RefSeq-85	Caudovirales	Siphoviridae	Unassigned	121_0	Clustered	6	VC_121_0	6	0.2674	1	0.2674	1	1	1	1
Lactobacillus~phage~JCL1032	RefSeq-85	Caudovirales	Siphoviridae	Unassigned		Outlier
Lactobacillus~phage~KC5a	RefSeq-85	Caudovirales	Myoviridae	Unassigned	157_0	Clustered	4	VC_157_0	4	0.4796	0.999978	0.4796	1	2	2	1
Lactobacillus~phage~LBR48	RefSeq-85	Caudovirales	Myoviridae	Unassigned	107_0	Clustered	2	VC_107_0	2	0.3406	0.9464	0.3224	1	2	1	1
Lactobacillus~phage~Lc-Nu	RefSeq-85	Caudovirales	Siphoviridae	Unassigned	121_0	Clustered	6	VC_121_0	6	0.2674	1	0.2674	1	1	1	1
Lactobacillus~phage~Ld17	RefSeq-85	Caudovirales	Siphoviridae	C5virus	265_0	Clustered	6	VC_265_0	6	0.9775	0.999999	0.9775	1	1	1	1
Lactobacillus~phage~Ld25A	RefSeq-85	Caudovirales	Siphoviridae	C5virus	265_0	Clustered	6	VC_265_0	6	0.9775	0.999999	0.9775	1	1	1	1
Lactobacillus~phage~Ld3	RefSeq-85	Caudovirales	Siphoviridae	C5virus	265_0	Clustered	6	VC_265_0	6	0.9775	0.999999	0.9775	1	1	1	1
Lactobacillus~phage~Ldl1	RefSeq-85	Caudovirales	Siphoviridae	Unassigned		Outlier
Lactobacillus~phage~LF1	RefSeq-85	Caudovirales	Siphoviridae	Unassigned	122_0	Clustered	2	VC_122_0	2	0.1007	0.954069	0.0961	1	1	1	1
Lactobacillus~phage~LfeInf	RefSeq-85	Caudovirales	Myoviridae	Unassigned		Outlier
Lactobacillus~phage~LfeSau	RefSeq-85	Caudovirales	Siphoviridae	Unassigned		Outlier
Lactobacillus~phage~LL-H	RefSeq-85	Caudovirales	Siphoviridae	Unassigned	106_0	Clustered	2	VC_106_0	2	0.1443	0.953804	0.1377	1	1	1	1
Lactobacillus~phage~Lrm1	RefSeq-85	Caudovirales	Siphoviridae	Unassigned	121_0	Clustered	6	VC_121_0	6	0.2674	1	0.2674	1	1	1	1
Lactobacillus~phage~Lv-1	RefSeq-85	Caudovirales	Siphoviridae	Unassigned		Outlier
Lactobacillus~phage~phi~jlb1	RefSeq-85	Caudovirales	Myoviridae	Unassigned	157_0	Clustered	4	VC_157_0	4	0.4796	0.999978	0.4796	1	2	2	1
Lactobacillus~phage~phiadh	RefSeq-85	Caudovirales	Siphoviridae	Unassigned		Outlier
Lactobacillus~phage~phiAQ113	RefSeq-85	Caudovirales	Myoviridae	Unassigned	157_0	Clustered	4	VC_157_0	4	0.4796	0.999978	0.4796	1	2	2	1
Lactobacillus~phage~phiAT3	RefSeq-85	Caudovirales	Siphoviridae	Unassigned	121_0	Clustered	6	VC_121_0	6	0.2674	1	0.2674	1	1	1	1
Lactobacillus~phage~phig1e	RefSeq-85	Caudovirales	Siphoviridae	Unassigned		Outlier
Lactobacillus~phage~phiJB	RefSeq-85	Caudovirales	Siphoviridae	Unassigned	106_0	Clustered	2	VC_106_0	2	0.1443	0.953804	0.1377	1	1	1	1
Lactobacillus~phage~phiLdb	RefSeq-85	Caudovirales	Siphoviridae	C5virus	265_0	Clustered	6	VC_265_0	6	0.9775	0.999999	0.9775	1	1	1	1
Lactobacillus~phage~phiPYB5	RefSeq-85	Caudovirales	Siphoviridae	Unassigned	122_0	Clustered	2	VC_122_0	2	0.1007	0.954069	0.0961	1	1	1	1
Lactobacillus~phage~PL-1	RefSeq-85	Caudovirales	Siphoviridae	Unassigned	121_0	Clustered	6	VC_121_0	6	0.2674	1	0.2674	1	1	1	1
Lactobacillus~phage~PLE2	RefSeq-85	Unassigned	Unassigned	Unassigned	130_0	Clustered	2	VC_130_0	2	0.1423	0.954294	0.1358	1	2	2	1
Lactobacillus~phage~PLE3	RefSeq-85	Unassigned	Unassigned	Unassigned		Overlap (VC_122/VC_146)
Lactobacillus~phage~Sha1	RefSeq-85	Caudovirales	Siphoviridae	Unassigned		Outlier
Lactobacillus~prophage~Lj771	RefSeq-85	Unassigned	Unassigned	Unassigned	157_0	Clustered	4	VC_157_0	4	0.4796	0.999978	0.4796	1	2	2	1
Lactobacillus~prophage~Lj928	RefSeq-85	Caudovirales	Siphoviridae	Unassigned		Outlier
Lactobacillus~prophage~Lj965	RefSeq-85	Caudovirales	Siphoviridae	Unassigned		Outlier
Lactobacillus~virus~ATCC8014	RefSeq-85	Caudovirales	Siphoviridae	Phijl1virus	144_0	Clustered	3	VC_144_0	3	0.6892	0.997841	0.6877	1	1	1	1
Lactobacillus~virus~c5	RefSeq-85	Caudovirales	Siphoviridae	C5virus	265_0	Clustered	6	VC_265_0	6	0.9775	0.999999	0.9775	1	1	1	1
Lactobacillus~virus~Lb338-1	RefSeq-85	Caudovirales	Myoviridae	Unassigned		Outlier
Lactobacillus~virus~LLKu	RefSeq-85	Caudovirales	Siphoviridae	C5virus	265_0	Clustered	6	VC_265_0	6	0.9775	0.999999	0.9775	1	1	1	1
Lactobacillus~virus~LP65	RefSeq-85	Caudovirales	Myoviridae	Unassigned		Outlier
Lactobacillus~virus~phiJL1	RefSeq-85	Caudovirales	Siphoviridae	Phijl1virus	144_0	Clustered	3	VC_144_0	3	0.6892	0.997841	0.6877	1	1	1	1
Lactoccocus~phage~WP-2	RefSeq-85	Caudovirales	Podoviridae	Unassigned		Outlier
Lactococcus~phage~1358	RefSeq-85	Caudovirales	Siphoviridae	Unassigned	136_0	Clustered	3	VC_136_0	3	0.5049	0.997174	0.5034	1	1	1	1
Lactococcus~phage~1706	RefSeq-85	Caudovirales	Siphoviridae	Unassigned		Outlier
Lactococcus~phage~28201	RefSeq-85	Unassigned	Unassigned	Unassigned		Overlap (VC_109/VC_265)
Lactococcus~phage~340	RefSeq-85	Caudovirales	Siphoviridae	Unassigned	267_0	Clustered	15	VC_267_0	15	0.9983	1	0.9983	2	1	1	1
Lactococcus~phage~50101	RefSeq-85	Unassigned	Unassigned	Unassigned		Overlap (VC_109/VC_160)
Lactococcus~phage~63301	RefSeq-85	Unassigned	Unassigned	Unassigned		Overlap (VC_109/VC_160)
Lactococcus~phage~949	RefSeq-85	Caudovirales	Siphoviridae	Unassigned	141_0	Clustered	3	VC_141_0	3	0.6736	0.996826	0.6715	1	1	1	1
Lactococcus~phage~98201	RefSeq-85	Unassigned	Unassigned	Unassigned		Overlap (VC_109/VC_265)
Lactococcus~phage~asccphi28	RefSeq-85	Caudovirales	Podoviridae	Unassigned		Outlier
Lactococcus~phage~bIL285	RefSeq-85	Caudovirales	Siphoviridae	Unassigned	108_0	Clustered	5	VC_108_0	5	0.1302	0.999917	0.1302	1	1	1	0.8
Lactococcus~phage~bIL286	RefSeq-85	Caudovirales	Siphoviridae	Unassigned	108_0	Clustered	5	VC_108_0	5	0.1302	0.999917	0.1302	1	1	1	0.8
Lactococcus~phage~bIL309	RefSeq-85	Caudovirales	Siphoviridae	Unassigned	108_0	Clustered	5	VC_108_0	5	0.1302	0.999917	0.1302	1	1	1	0.8
Lactococcus~phage~bIL310	RefSeq-85	Caudovirales	Siphoviridae	Unassigned	269_0	Clustered	2	VC_269_0	2	0.6521	0.855578	0.5579	1	1	1	1
Lactococcus~phage~bIL311	RefSeq-85	Caudovirales	Siphoviridae	Unassigned		Singleton
Lactococcus~phage~bIL312	RefSeq-85	Caudovirales	Siphoviridae	Unassigned	269_0	Clustered	2	VC_269_0	2	0.6521	0.855578	0.5579	1	1	1	1
Lactococcus~phage~BK5-T	RefSeq-85	Caudovirales	Siphoviridae	Unassigned	108_0	Clustered	5	VC_108_0	5	0.1302	0.999917	0.1302	1	1	1	0.8
Lactococcus~phage~BM13	RefSeq-85	Caudovirales	Siphoviridae	Unassigned	108_0	Clustered	5	VC_108_0	5	0.1302	0.999917	0.1302	1	1	1	0.8
Lactococcus~phage~D4410	RefSeq-85	Unassigned	Unassigned	Unassigned	268_0	Clustered	7	VC_268_0	7	0.9362	1	0.9362	2	2	2	1
Lactococcus~phage~D4412	RefSeq-85	Unassigned	Unassigned	Unassigned	268_0	Clustered	7	VC_268_0	7	0.9362	1	0.9362	2	2	2	1
Lactococcus~phage~GE1	RefSeq-85	Caudovirales	Siphoviridae	Unassigned		Outlier
Lactococcus~phage~jm2	RefSeq-85	Caudovirales	Siphoviridae	Unassigned	267_0	Clustered	15	VC_267_0	15	0.9983	1	0.9983	2	1	1	1
Lactococcus~phage~jm3	RefSeq-85	Caudovirales	Siphoviridae	Unassigned	267_0	Clustered	15	VC_267_0	15	0.9983	1	0.9983	2	1	1	1
Lactococcus~phage~M5938	RefSeq-85	Unassigned	Unassigned	Unassigned	268_0	Clustered	7	VC_268_0	7	0.9362	1	0.9362	2	2	2	1
Lactococcus~phage~M6162	RefSeq-85	Unassigned	Unassigned	Unassigned	268_0	Clustered	7	VC_268_0	7	0.9362	1	0.9362	2	2	2	1
Lactococcus~phage~M6165	RefSeq-85	Unassigned	Unassigned	Unassigned	268_0	Clustered	7	VC_268_0	7	0.9362	1	0.9362	2	2	2	1
Lactococcus~phage~P078	RefSeq-85	Caudovirales	Siphoviridae	Unassigned	83_0	Clustered	4	VC_83_0	4	0.7447	0.999772	0.7446	1	1	1	1
Lactococcus~phage~P087	RefSeq-85	Caudovirales	Siphoviridae	Unassigned		Singleton
Lactococcus~phage~P092	RefSeq-85	Caudovirales	Siphoviridae	Unassigned	83_0	Clustered	4	VC_83_0	4	0.7447	0.999772	0.7446	1	1	1	1
Lactococcus~phage~P118	RefSeq-85	Caudovirales	Siphoviridae	Unassigned	83_0	Clustered	4	VC_83_0	4	0.7447	0.999772	0.7446	1	1	1	1
Lactococcus~phage~P162	RefSeq-85	Caudovirales	Siphoviridae	Unassigned	83_0	Clustered	4	VC_83_0	4	0.7447	0.999772	0.7446	1	1	1	1
Lactococcus~phage~P335~sensu~lato	RefSeq-85	Caudovirales	Siphoviridae	Unassigned		Outlier
Lactococcus~phage~P680	RefSeq-85	Caudovirales	Siphoviridae	Unassigned	267_0	Clustered	15	VC_267_0	15	0.9983	1	0.9983	2	1	1	1
Lactococcus~phage~phi7	RefSeq-85	Caudovirales	Siphoviridae	Unassigned	267_0	Clustered	15	VC_267_0	15	0.9983	1	0.9983	2	1	1	1
Lactococcus~phage~phiL47	RefSeq-85	Caudovirales	Siphoviridae	Unassigned	141_0	Clustered	3	VC_141_0	3	0.6736	0.996826	0.6715	1	1	1	1
Lactococcus~phage~phiLC3	RefSeq-85	Caudovirales	Siphoviridae	Unassigned		Overlap (VC_109/VC_160)
Lactococcus~phage~PLgT-1	RefSeq-85	Unassigned	Unassigned	Unassigned		Outlier
Lactococcus~phage~Q54	RefSeq-85	Caudovirales	Siphoviridae	Unassigned		Outlier
Lactococcus~phage~r1t	RefSeq-85	Caudovirales	Siphoviridae	Unassigned		Overlap (VC_109/VC_160)
Lactococcus~phage~TP901-1	RefSeq-85	Caudovirales	Siphoviridae	Unassigned		Overlap (VC_109/VC_161)
Lactococcus~phage~Tuc2009	RefSeq-85	Caudovirales	Siphoviridae	Unassigned		Overlap (VC_109/VC_161)
Lactococcus~phage~ul36	RefSeq-85	Caudovirales	Siphoviridae	Unassigned		Overlap (VC_109/VC_161)
Lactococcus~phage~WRP3	RefSeq-85	Caudovirales	Siphoviridae	Unassigned	141_0	Clustered	3	VC_141_0	3	0.6736	0.996826	0.6715	1	1	1	1
Lactococcus~virus~712	RefSeq-85	Caudovirales	Siphoviridae	Sk1virus	267_0	Clustered	15	VC_267_0	15	0.9983	1	0.9983	2	1	1	1
Lactococcus~virus~ASCC191	RefSeq-85	Caudovirales	Siphoviridae	Sk1virus	267_0	Clustered	15	VC_267_0	15	0.9983	1	0.9983	2	1	1	1
Lactococcus~virus~Bibb29	RefSeq-85	Caudovirales	Siphoviridae	Sk1virus	267_0	Clustered	15	VC_267_0	15	0.9983	1	0.9983	2	1	1	1
Lactococcus~virus~bIL170	RefSeq-85	Caudovirales	Siphoviridae	Sk1virus	267_0	Clustered	15	VC_267_0	15	0.9983	1	0.9983	2	1	1	1
Lactococcus~virus~bIL67	RefSeq-85	Caudovirales	Siphoviridae	C2virus	268_0	Clustered	7	VC_268_0	7	0.9362	1	0.9362	2	2	2	1
Lactococcus~virus~c2	RefSeq-85	Caudovirales	Siphoviridae	C2virus	268_0	Clustered	7	VC_268_0	7	0.9362	1	0.9362	2	2	2	1
Lactococcus~virus~CB13	RefSeq-85	Caudovirales	Siphoviridae	Sk1virus	267_0	Clustered	15	VC_267_0	15	0.9983	1	0.9983	2	1	1	1
Lactococcus~virus~CB14	RefSeq-85	Caudovirales	Siphoviridae	Sk1virus	267_0	Clustered	15	VC_267_0	15	0.9983	1	0.9983	2	1	1	1
Lactococcus~virus~jj50	RefSeq-85	Caudovirales	Siphoviridae	Sk1virus	267_0	Clustered	15	VC_267_0	15	0.9983	1	0.9983	2	1	1	1
Lactococcus~virus~KSY1	RefSeq-85	Caudovirales	Podoviridae	Unassigned		Singleton
Lactococcus~virus~P008	RefSeq-85	Caudovirales	Siphoviridae	Sk1virus	267_0	Clustered	15	VC_267_0	15	0.9983	1	0.9983	2	1	1	1
Lactococcus~virus~sk1	RefSeq-85	Caudovirales	Siphoviridae	Sk1virus	267_0	Clustered	15	VC_267_0	15	0.9983	1	0.9983	2	1	1	1
Lactococcus~virus~Sl4	RefSeq-85	Caudovirales	Siphoviridae	Sk1virus	267_0	Clustered	15	VC_267_0	15	0.9983	1	0.9983	2	1	1	1
Lelliottia~phage~phD2B	RefSeq-85	Caudovirales	Podoviridae	Unassigned	30_0	Clustered	15	VC_30_0	15	0.4346	1	0.4346	2	2	2	1
Leuconostoc~phage~1-A4	RefSeq-85	Caudovirales	Siphoviridae	Una4virus	271_0	Clustered	7	VC_271_0	7	0.6457	1	0.6457	2	1	1	1
Leuconostoc~phage~Lmd1	RefSeq-85	Caudovirales	Siphoviridae	Lmd1virus	270_0	Clustered	6	VC_270_0	6	0.5834	1	0.5834	1	1	1	1
Leuconostoc~phage~Ln-8	RefSeq-85	Caudovirales	Siphoviridae	Una4virus	271_0	Clustered	7	VC_271_0	7	0.6457	1	0.6457	2	1	1	1
Leuconostoc~phage~Ln-9	RefSeq-85	Caudovirales	Siphoviridae	Una4virus	271_0	Clustered	7	VC_271_0	7	0.6457	1	0.6457	2	1	1	1
Leuconostoc~phage~P793	RefSeq-85	Caudovirales	Siphoviridae	Lmd1virus	270_0	Clustered	6	VC_270_0	6	0.5834	1	0.5834	1	1	1	1
Leuconostoc~phage~phiLN03	RefSeq-85	Caudovirales	Siphoviridae	Lmd1virus	270_0	Clustered	6	VC_270_0	6	0.5834	1	0.5834	1	1	1	1
Leuconostoc~phage~phiLN04	RefSeq-85	Caudovirales	Siphoviridae	Lmd1virus	270_0	Clustered	6	VC_270_0	6	0.5834	1	0.5834	1	1	1	1
Leuconostoc~phage~phiLN12	RefSeq-85	Caudovirales	Siphoviridae	Lmd1virus	270_0	Clustered	6	VC_270_0	6	0.5834	1	0.5834	1	1	1	1
Leuconostoc~phage~phiLN25	RefSeq-85	Caudovirales	Siphoviridae	Una4virus	271_0	Clustered	7	VC_271_0	7	0.6457	1	0.6457	2	1	1	1
Leuconostoc~phage~phiLN34	RefSeq-85	Caudovirales	Siphoviridae	Una4virus	271_0	Clustered	7	VC_271_0	7	0.6457	1	0.6457	2	1	1	1
Leuconostoc~phage~phiLN6B	RefSeq-85	Caudovirales	Siphoviridae	Lmd1virus	270_0	Clustered	6	VC_270_0	6	0.5834	1	0.5834	1	1	1	1
Leuconostoc~phage~phiLNTR2	RefSeq-85	Caudovirales	Siphoviridae	Unassigned	271_0	Clustered	7	VC_271_0	7	0.6457	1	0.6457	2	1	1	1
Leuconostoc~phage~phiLNTR3	RefSeq-85	Caudovirales	Siphoviridae	Una4virus	271_0	Clustered	7	VC_271_0	7	0.6457	1	0.6457	2	1	1	1
Liberibacter~phage~SC1	RefSeq-85	Caudovirales	Podoviridae	Unassigned	151_0	Clustered	2	VC_151_0	2	0.5232	0.940714	0.4922	1	1	1	1
Liberibacter~phage~SC2	RefSeq-85	Caudovirales	Podoviridae	Unassigned	151_0	Clustered	2	VC_151_0	2	0.5232	0.940714	0.4922	1	1	1	1
Listeria~phage~2389	RefSeq-85	Caudovirales	Siphoviridae	Unassigned	123_0	Clustered	4	VC_123_0	4	0.3042	0.999984	0.3042	2	1	1	1
Listeria~phage~A006	RefSeq-85	Caudovirales	Siphoviridae	Unassigned		Outlier
Listeria~phage~A118	RefSeq-85	Caudovirales	Siphoviridae	Unassigned	109_0	Clustered	4	VC_109_0	4	0.4423	0.999973	0.4423	1	1	1	1
Listeria~phage~A500	RefSeq-85	Caudovirales	Siphoviridae	Unassigned	109_0	Clustered	4	VC_109_0	4	0.4423	0.999973	0.4423	1	1	1	1
Listeria~phage~B025	RefSeq-85	Caudovirales	Siphoviridae	Unassigned	123_0	Clustered	4	VC_123_0	4	0.3042	0.999984	0.3042	2	1	1	1
Listeria~phage~B054	RefSeq-85	Caudovirales	Siphoviridae	Unassigned	107_0	Clustered	2	VC_107_0	2	0.3406	0.9464	0.3224	1	2	1	1
Listeria~phage~List-36	RefSeq-85	Caudovirales	Myoviridae	P100virus		Overlap (VC_99/VC_102)
Listeria~phage~LMSP-25	RefSeq-85	Caudovirales	Myoviridae	P100virus		Overlap (VC_99/VC_102)
Listeria~phage~LMTA-148	RefSeq-85	Caudovirales	Myoviridae	P100virus		Overlap (VC_99/VC_102)
Listeria~phage~LP-026	RefSeq-85	Caudovirales	Siphoviridae	P70virus	200_0	Clustered	5	VC_200_0	5	0.948	0.999998	0.948	1	1	1	1
Listeria~phage~LP-030-2	RefSeq-85	Caudovirales	Siphoviridae	Psavirus	123_0	Clustered	4	VC_123_0	4	0.3042	0.999984	0.3042	2	1	1	1
Listeria~phage~LP-030-3	RefSeq-85	Caudovirales	Siphoviridae	Unassigned	109_0	Clustered	4	VC_109_0	4	0.4423	0.999973	0.4423	1	1	1	1
Listeria~phage~LP-037	RefSeq-85	Caudovirales	Siphoviridae	P70virus	200_0	Clustered	5	VC_200_0	5	0.948	0.999998	0.948	1	1	1	1
Listeria~phage~LP-048	RefSeq-85	Caudovirales	Myoviridae	P100virus		Overlap (VC_99/VC_102)
Listeria~phage~LP-083-2	RefSeq-85	Caudovirales	Myoviridae	P100virus		Overlap (VC_99/VC_102)
Listeria~phage~LP-101	RefSeq-85	Caudovirales	Siphoviridae	Unassigned	123_0	Clustered	4	VC_123_0	4	0.3042	0.999984	0.3042	2	1	1	1
Listeria~phage~LP-110	RefSeq-85	Caudovirales	Siphoviridae	P70virus	200_0	Clustered	5	VC_200_0	5	0.948	0.999998	0.948	1	1	1	1
Listeria~phage~LP-114	RefSeq-85	Caudovirales	Siphoviridae	P70virus	200_0	Clustered	5	VC_200_0	5	0.948	0.999998	0.948	1	1	1	1
Listeria~phage~LP-125	RefSeq-85	Caudovirales	Myoviridae	P100virus		Overlap (VC_99/VC_102)
Listeria~phage~P35	RefSeq-85	Caudovirales	Siphoviridae	Unassigned	136_0	Clustered	3	VC_136_0	3	0.5049	0.997174	0.5034	1	1	1	1
Listeria~phage~P40	RefSeq-85	Caudovirales	Siphoviridae	Unassigned	136_0	Clustered	3	VC_136_0	3	0.5049	0.997174	0.5034	1	1	1	1
Listeria~phage~P70	RefSeq-85	Caudovirales	Siphoviridae	P70virus	200_0	Clustered	5	VC_200_0	5	0.948	0.999998	0.948	1	1	1	1
Listeria~phage~vB_LmoM_AG20	RefSeq-85	Caudovirales	Myoviridae	P100virus		Overlap (VC_99/VC_102)
Listeria~phage~vB_LmoS_188	RefSeq-85	Caudovirales	Siphoviridae	Unassigned		Outlier
Listeria~phage~vB_LmoS_293	RefSeq-85	Caudovirales	Siphoviridae	Unassigned	109_0	Clustered	4	VC_109_0	4	0.4423	0.999973	0.4423	1	1	1	1
Listeria~phage~WIL-1	RefSeq-85	Caudovirales	Myoviridae	P100virus		Outlier
Listeria~virus~A511	RefSeq-85	Caudovirales	Myoviridae	P100virus		Overlap (VC_99/VC_102)
Listonella~phage~phiHSIC	RefSeq-85	Caudovirales	Siphoviridae	Unassigned		Overlap (VC_166/VC_167)
Loktanella~phage~pCB2051-A	RefSeq-85	Unassigned	Unassigned	Unassigned		Outlier
Mannheimia~phage~phiMHaA1	RefSeq-85	Caudovirales	Myoviridae	P2virus	69_0	Clustered	29	VC_69_0	29	0.804	1	0.804	2	1	1	1
Mannheimia~phage~vB_MhM_3927AP2	RefSeq-85	Caudovirales	Myoviridae	Unassigned		Outlier
Mannheimia~phage~vB_MhM_587AP1	RefSeq-85	Caudovirales	Myoviridae	Unassigned	69_0	Clustered	29	VC_69_0	29	0.804	1	0.804	2	1	1	1
Mannheimia~phage~vB_MhS_1152AP2	RefSeq-85	Caudovirales	Siphoviridae	Unassigned	50_0	Clustered	3	VC_50_0	3	0.231	0.998481	0.2307	1	1	1	0.6667
Mannheimia~phage~vB_MhS_535AP2	RefSeq-85	Caudovirales	Siphoviridae	Unassigned	50_0	Clustered	3	VC_50_0	3	0.231	0.998481	0.2307	1	1	1	0.6667
Mannheimia~phage~vB_MhS_587AP2	RefSeq-85	Caudovirales	Siphoviridae	Unassigned	50_0	Clustered	3	VC_50_0	3	0.231	0.998481	0.2307	1	1	1	0.6667
Marine~gokushovirus	RefSeq-85	Unassigned	Microviridae	Unassigned	154_0	Clustered	12	VC_154_0	12	0.8784	1	0.8784	3	2	1	1
Marinomonas~phage~P12026	RefSeq-85	Unassigned	Unassigned	Unassigned		Overlap (VC_6/VC_78)
Mesorhizobium~phage~vB_MloP_Lo5R7ANS	RefSeq-85	Caudovirales	Podoviridae	Unassigned		Outlier
Metallosphaera~turreted~icosahedral~virus	RefSeq-85	Unassigned	Unassigned	Unassigned		Singleton
Methanobacterium~phage~psiM2	RefSeq-85	Caudovirales	Siphoviridae	Unassigned	272_0	Clustered	2	VC_272_0	2	1	1	1	1	1	1	1
Methanothermobacter~phage~psiM100	RefSeq-85	Caudovirales	Siphoviridae	Unassigned	272_0	Clustered	2	VC_272_0	2	1	1	1	1	1	1	1
Microbacterium~phage~Min1	RefSeq-85	Caudovirales	Siphoviridae	Unassigned		Outlier
Microbacterium~phage~vB_MoxS-ISF9	RefSeq-85	Caudovirales	Siphoviridae	Unassigned	196_0	Clustered	3	VC_196_0	3	1	1	1	1	1	1	1
Microcystis~aeruginosa~phage~Ma-LMM01	RefSeq-85	Caudovirales	Myoviridae	Unassigned	274_0	Clustered	2	VC_274_0	2	1	1	1	1	1	1	1
Microcystis~phage~MaMV-DC	RefSeq-85	Caudovirales	Myoviridae	Unassigned	274_0	Clustered	2	VC_274_0	2	1	1	1	1	1	1	1
Microviridae~Bog1249_12	RefSeq-85	Unassigned	Microviridae	Unassigned	191_0	Clustered	10	VC_191_0	10	0.9183	1	0.9183	1	1	1	1
Microviridae~Bog5275_51	RefSeq-85	Unassigned	Microviridae	Unassigned	191_0	Clustered	10	VC_191_0	10	0.9183	1	0.9183	1	1	1	1
Microviridae~Bog9017_22	RefSeq-85	Unassigned	Microviridae	Unassigned	191_0	Clustered	10	VC_191_0	10	0.9183	1	0.9183	1	1	1	1
Microviridae~Fen2266_11	RefSeq-85	Unassigned	Microviridae	Unassigned	191_0	Clustered	10	VC_191_0	10	0.9183	1	0.9183	1	1	1	1
Microviridae~Fen418_41	RefSeq-85	Unassigned	Microviridae	Unassigned	191_0	Clustered	10	VC_191_0	10	0.9183	1	0.9183	1	1	1	1
Microviridae~Fen4707_41	RefSeq-85	Unassigned	Microviridae	Unassigned	191_0	Clustered	10	VC_191_0	10	0.9183	1	0.9183	1	1	1	1
Microviridae~Fen685_11	RefSeq-85	Unassigned	Microviridae	Unassigned	191_0	Clustered	10	VC_191_0	10	0.9183	1	0.9183	1	1	1	1
Microviridae~Fen7786_21	RefSeq-85	Unassigned	Microviridae	Unassigned	191_0	Clustered	10	VC_191_0	10	0.9183	1	0.9183	1	1	1	1
Microviridae~Fen7895_21	RefSeq-85	Unassigned	Microviridae	Unassigned	191_0	Clustered	10	VC_191_0	10	0.9183	1	0.9183	1	1	1	1
Microviridae~Fen7918_21	RefSeq-85	Unassigned	Microviridae	Unassigned	191_0	Clustered	10	VC_191_0	10	0.9183	1	0.9183	1	1	1	1
Microviridae~Fen7940_21	RefSeq-85	Unassigned	Microviridae	Unassigned		Outlier
Microviridae~IME-16	RefSeq-85	Unassigned	Microviridae	Unassigned		Singleton
Microviridae~phi-CA82	RefSeq-85	Unassigned	Microviridae	Unassigned		Outlier
Morganella~phage~MmP1	RefSeq-85	Caudovirales	Podoviridae	Unassigned	34_0	Clustered	57	VC_34_0	57	0.8041	1	0.8041	3	2	2	1
Morganella~phage~vB_MmoM_MP1	RefSeq-85	Unassigned	Unassigned	Unassigned	35_20	Clustered	2	VC_35_20	2	0.0068	0.957588	0.0065	1	2	2	1
Morganella~phage~vB_MmoP_MP2	RefSeq-85	Unassigned	Unassigned	Unassigned	34_0	Clustered	57	VC_34_0	57	0.8041	1	0.8041	3	2	2	1
Mycobacterium~phage~20ES	RefSeq-85	Caudovirales	Siphoviridae	Unassigned	230_1	Clustered	58	VC_230_1	58	0.4877	1	0.4877	2	3	2	0.7647
Mycobacterium~phage~32HC	RefSeq-85	Caudovirales	Siphoviridae	Trigintaduovirus		Outlier
Mycobacterium~phage~39HC	RefSeq-85	Caudovirales	Siphoviridae	Unassigned	66_2	Clustered	15	VC_66_2	15	0.2794	1	0.2794	3	1	1	0.8
Mycobacterium~phage~40AC	RefSeq-85	Caudovirales	Siphoviridae	Unassigned	230_1	Clustered	58	VC_230_1	58	0.4877	1	0.4877	2	3	2	0.7647
Mycobacterium~phage~Abrogate	RefSeq-85	Caudovirales	Siphoviridae	Unassigned	250_0	Clustered	46	VC_250_0	46	0.4921	1	0.4921	2	2	2	1
Mycobacterium~phage~Adawi	RefSeq-85	Caudovirales	Siphoviridae	Coopervirus	66_2	Clustered	15	VC_66_2	15	0.2794	1	0.2794	3	1	1	0.8
Mycobacterium~phage~Adler	RefSeq-85	Caudovirales	Siphoviridae	Unassigned		Singleton
Mycobacterium~phage~Adzzy	RefSeq-85	Caudovirales	Siphoviridae	Unassigned	230_1	Clustered	58	VC_230_1	58	0.4877	1	0.4877	2	3	2	0.7647
Mycobacterium~phage~Aeneas	RefSeq-85	Caudovirales	Siphoviridae	Unassigned	250_0	Clustered	46	VC_250_0	46	0.4921	1	0.4921	2	2	2	1
Mycobacterium~phage~Akoma	RefSeq-85	Caudovirales	Siphoviridae	Unassigned	66_0	Clustered	6	VC_66_0	6	0.1761	1	0.1761	2	1	1	1
Mycobacterium~phage~Alice	RefSeq-85	Caudovirales	Myoviridae	Bxz1virus	275_0	Clustered	19	VC_275_0	19	0.9168	1	0.9168	2	2	2	1
Mycobacterium~phage~Alsfro	RefSeq-85	Caudovirales	Siphoviridae	Unassigned	250_0	Clustered	46	VC_250_0	46	0.4921	1	0.4921	2	2	2	1
Mycobacterium~phage~Alvin	RefSeq-85	Caudovirales	Siphoviridae	Unassigned	250_0	Clustered	46	VC_250_0	46	0.4921	1	0.4921	2	2	2	1
Mycobacterium~phage~Angel	RefSeq-85	Caudovirales	Siphoviridae	Unassigned	242_0	Clustered	9	VC_242_0	9	0.4982	1	0.4982	2	2	2	1
Mycobacterium~phage~AnnaL29	RefSeq-85	Caudovirales	Siphoviridae	Unassigned	230_1	Clustered	58	VC_230_1	58	0.4877	1	0.4877	2	3	2	0.7647
Mycobacterium~phage~Anubis	RefSeq-85	Caudovirales	Siphoviridae	Unassigned	230_1	Clustered	58	VC_230_1	58	0.4877	1	0.4877	2	3	2	0.7647
Mycobacterium~phage~Apizium	RefSeq-85	Caudovirales	Siphoviridae	Pg1virus	66_1	Clustered	20	VC_66_1	20	0.5117	1	0.5117	2	1	1	1
Mycobacterium~phage~ArcherNM	RefSeq-85	Unassigned	Unassigned	Unassigned	230_1	Clustered	58	VC_230_1	58	0.4877	1	0.4877	2	3	2	0.7647
Mycobacterium~phage~ArcherS7	RefSeq-85	Caudovirales	Myoviridae	Bxz1virus	275_0	Clustered	19	VC_275_0	19	0.9168	1	0.9168	2	2	2	1
Mycobacterium~phage~Archie	RefSeq-85	Caudovirales	Siphoviridae	Unassigned	233_0	Clustered	9	VC_233_0	9	0.6297	1	0.6297	2	2	2	1
Mycobacterium~phage~Ariel	RefSeq-85	Caudovirales	Siphoviridae	Unassigned	234_0	Clustered	3	VC_234_0	3	0.0787	0.998068	0.0786	2	1	1	1
Mycobacterium~phage~Artemis2UCLA	RefSeq-85	Caudovirales	Siphoviridae	Unassigned	230_1	Clustered	58	VC_230_1	58	0.4877	1	0.4877	2	3	2	0.7647
Mycobacterium~phage~Astraea	RefSeq-85	Caudovirales	Myoviridae	Bxz1virus	275_0	Clustered	19	VC_275_0	19	0.9168	1	0.9168	2	2	2	1
Mycobacterium~phage~Bactobuster	RefSeq-85	Unassigned	Unassigned	Unassigned	230_1	Clustered	58	VC_230_1	58	0.4877	1	0.4877	2	3	2	0.7647
Mycobacterium~phage~Badfish	RefSeq-85	Caudovirales	Siphoviridae	Pg1virus	66_1	Clustered	20	VC_66_1	20	0.5117	1	0.5117	2	1	1	1
Mycobacterium~phage~Baee	RefSeq-85	Caudovirales	Siphoviridae	Acadianvirus	66_2	Clustered	15	VC_66_2	15	0.2794	1	0.2794	3	1	1	0.8
Mycobacterium~phage~Bane1	RefSeq-85	Caudovirales	Siphoviridae	Coopervirus	66_2	Clustered	15	VC_66_2	15	0.2794	1	0.2794	3	1	1	0.8
Mycobacterium~phage~Barnyard	RefSeq-85	Caudovirales	Siphoviridae	Barnyardvirus		Outlier
Mycobacterium~phage~BarrelRoll	RefSeq-85	Caudovirales	Siphoviridae	Unassigned	241_2	Clustered	12	VC_241_2	12	0.4357	1	0.4357	2	1	1	0.9848
Mycobacterium~phage~Barriga	RefSeq-85	Caudovirales	Siphoviridae	Unassigned	250_0	Clustered	46	VC_250_0	46	0.4921	1	0.4921	2	2	2	1
Mycobacterium~phage~BellusTerra	RefSeq-85	Caudovirales	Siphoviridae	Unassigned	230_1	Clustered	58	VC_230_1	58	0.4877	1	0.4877	2	3	2	0.7647
Mycobacterium~phage~Bernal13	RefSeq-85	Caudovirales	Siphoviridae	Bernal13virus		Outlier
Mycobacterium~phage~Bernardo	RefSeq-85	Caudovirales	Siphoviridae	Pipefishvirus	66_0	Clustered	6	VC_66_0	6	0.1761	1	0.1761	2	1	1	1
Mycobacterium~phage~BigNuz	RefSeq-85	Caudovirales	Siphoviridae	Bignuzvirus		Overlap (VC_239/VC_240)
Mycobacterium~phage~Bipolar	RefSeq-85	Caudovirales	Siphoviridae	Unassigned	245_1	Clustered	40	VC_245_1	40	0.7176	1	0.7176	2	2	2	0.8731
Mycobacterium~phage~Bipper	RefSeq-85	Unassigned	Unassigned	Unassigned		Outlier
Mycobacterium~phage~Blue7	RefSeq-85	Caudovirales	Siphoviridae	Unassigned	230_1	Clustered	58	VC_230_1	58	0.4877	1	0.4877	2	3	2	0.7647
Mycobacterium~phage~Bobi	RefSeq-85	Caudovirales	Siphoviridae	Unassigned	245_1	Clustered	40	VC_245_1	40	0.7176	1	0.7176	2	2	2	0.8731
Mycobacterium~phage~Breeniome	RefSeq-85	Caudovirales	Myoviridae	Bxz1virus	275_0	Clustered	19	VC_275_0	19	0.9168	1	0.9168	2	2	2	1
Mycobacterium~phage~Brocalys	RefSeq-85	Unassigned	Unassigned	Unassigned	245_1	Clustered	40	VC_245_1	40	0.7176	1	0.7176	2	2	2	0.8731
Mycobacterium~phage~BrownCNA	RefSeq-85	Caudovirales	Siphoviridae	Coopervirus	66_2	Clustered	15	VC_66_2	15	0.2794	1	0.2794	3	1	1	0.8
Mycobacterium~phage~Bruin	RefSeq-85	Caudovirales	Siphoviridae	Unassigned	228_0	Clustered	21	VC_228_0	21	0.8411	1	0.8411	2	1	1	1
Mycobacterium~phage~Brusacoram	RefSeq-85	Caudovirales	Siphoviridae	Fishburnevirus		Overlap (VC_239/VC_240)
Mycobacterium~phage~BTCU-1	RefSeq-85	Caudovirales	Siphoviridae	Unassigned	230_1	Clustered	58	VC_230_1	58	0.4877	1	0.4877	2	3	2	0.7647
Mycobacterium~phage~Butters	RefSeq-85	Caudovirales	Siphoviridae	Buttersvirus	239_0	Clustered	8	VC_239_0	8	0.2354	1	0.2354	4	1	1	1
Mycobacterium~phage~BuzzLyseyear	RefSeq-85	Caudovirales	Siphoviridae	Unassigned	245_1	Clustered	40	VC_245_1	40	0.7176	1	0.7176	2	2	2	0.8731
Mycobacterium~phage~Bxz1	RefSeq-85	Caudovirales	Myoviridae	Bxz1virus	275_0	Clustered	19	VC_275_0	19	0.9168	1	0.9168	2	2	2	1
Mycobacterium~phage~Cabrinians	RefSeq-85	Caudovirales	Siphoviridae	Unassigned	245_1	Clustered	40	VC_245_1	40	0.7176	1	0.7176	2	2	2	0.8731
Mycobacterium~phage~Cali	RefSeq-85	Caudovirales	Myoviridae	Bxz1virus	275_0	Clustered	19	VC_275_0	19	0.9168	1	0.9168	2	2	2	1
Mycobacterium~phage~Cambiare	RefSeq-85	Caudovirales	Siphoviridae	Unassigned	242_0	Clustered	9	VC_242_0	9	0.4982	1	0.4982	2	2	2	1
Mycobacterium~phage~CaptainTrips	RefSeq-85	Caudovirales	Siphoviridae	Unassigned	245_1	Clustered	40	VC_245_1	40	0.7176	1	0.7176	2	2	2	0.8731
Mycobacterium~phage~Carcharodon	RefSeq-85	Caudovirales	Siphoviridae	Unassigned	239_0	Clustered	8	VC_239_0	8	0.2354	1	0.2354	4	1	1	1
Mycobacterium~phage~CASbig	RefSeq-85	Caudovirales	Siphoviridae	Unassigned	250_0	Clustered	46	VC_250_0	46	0.4921	1	0.4921	2	2	2	1
Mycobacterium~phage~Catalina	RefSeq-85	Unassigned	Unassigned	Unassigned	230_1	Clustered	58	VC_230_1	58	0.4877	1	0.4877	2	3	2	0.7647
Mycobacterium~phage~Catdawg	RefSeq-85	Caudovirales	Siphoviridae	Unassigned	243_0	Clustered	4	VC_243_0	4	0.3731	0.999987	0.3731	2	1	1	1
Mycobacterium~phage~Catera	RefSeq-85	Caudovirales	Myoviridae	Bxz1virus	275_0	Clustered	19	VC_275_0	19	0.9168	1	0.9168	2	2	2	1
Mycobacterium~phage~Cerasum	RefSeq-85	Caudovirales	Siphoviridae	Unassigned	245_0	Clustered	2	VC_245_0	2	0.0216	0.956806	0.0206	1	1	1	1
Mycobacterium~phage~Chadwick	RefSeq-85	Caudovirales	Siphoviridae	Unassigned	230_0	Clustered	9	VC_230_0	9	0.0814	1	0.0814	1	1	1	1
Mycobacterium~phage~Charlie	RefSeq-85	Caudovirales	Siphoviridae	Charlievirus	239_0	Clustered	8	VC_239_0	8	0.2354	1	0.2354	4	1	1	1
Mycobacterium~phage~Cheetobro	RefSeq-85	Caudovirales	Siphoviridae	Unassigned	241_0	Clustered	2	VC_241_0	2	0.0635	0.956992	0.0607	2	1	1	1
Mycobacterium~phage~Chy4	RefSeq-85	Caudovirales	Siphoviridae	Unassigned	230_1	Clustered	58	VC_230_1	58	0.4877	1	0.4877	2	3	2	0.7647
Mycobacterium~phage~Chy5	RefSeq-85	Caudovirales	Siphoviridae	Unassigned	230_1	Clustered	58	VC_230_1	58	0.4877	1	0.4877	2	3	2	0.7647
Mycobacterium~phage~CloudWang3	RefSeq-85	Caudovirales	Siphoviridae	Unassigned	230_1	Clustered	58	VC_230_1	58	0.4877	1	0.4877	2	3	2	0.7647
Mycobacterium~phage~Colbert	RefSeq-85	Caudovirales	Siphoviridae	Pg1virus	66_1	Clustered	20	VC_66_1	20	0.5117	1	0.5117	2	1	1	1
Mycobacterium~phage~Conspiracy	RefSeq-85	Caudovirales	Siphoviridae	Unassigned	230_0	Clustered	9	VC_230_0	9	0.0814	1	0.0814	1	1	1	1
Mycobacterium~phage~Contagion	RefSeq-85	Caudovirales	Siphoviridae	Unassigned	228_0	Clustered	21	VC_228_0	21	0.8411	1	0.8411	2	1	1	1
Mycobacterium~phage~Cooper	RefSeq-85	Caudovirales	Siphoviridae	Coopervirus	66_2	Clustered	15	VC_66_2	15	0.2794	1	0.2794	3	1	1	0.8
Mycobacterium~phage~CRB1	RefSeq-85	Caudovirales	Siphoviridae	Unassigned	230_1	Clustered	58	VC_230_1	58	0.4877	1	0.4877	2	3	2	0.7647
Mycobacterium~phage~Crossroads	RefSeq-85	Caudovirales	Siphoviridae	Unassigned	233_0	Clustered	9	VC_233_0	9	0.6297	1	0.6297	2	2	2	1
Mycobacterium~phage~Daenerys	RefSeq-85	Caudovirales	Siphoviridae	Unassigned	245_1	Clustered	40	VC_245_1	40	0.7176	1	0.7176	2	2	2	0.8731
Mycobacterium~phage~Damien	RefSeq-85	Caudovirales	Siphoviridae	Unassigned	204_0	Clustered	4	VC_204_0	4	0.4692	0.999964	0.4692	2	1	1	1
Mycobacterium~phage~Dandelion	RefSeq-85	Caudovirales	Myoviridae	Bxz1virus	275_0	Clustered	19	VC_275_0	19	0.9168	1	0.9168	2	2	2	1
Mycobacterium~phage~Dante	RefSeq-85	Caudovirales	Siphoviridae	Unassigned	245_1	Clustered	40	VC_245_1	40	0.7176	1	0.7176	2	2	2	0.8731
Mycobacterium~phage~DD5	RefSeq-85	Caudovirales	Siphoviridae	Unassigned	250_0	Clustered	46	VC_250_0	46	0.4921	1	0.4921	2	2	2	1
Mycobacterium~phage~Donovan	RefSeq-85	Caudovirales	Siphoviridae	Fishburnevirus		Overlap (VC_239/VC_240)
Mycobacterium~phage~Dori	RefSeq-85	Caudovirales	Siphoviridae	Unassigned		Outlier
Mycobacterium~phage~DrDrey	RefSeq-85	Caudovirales	Siphoviridae	Unassigned	228_0	Clustered	21	VC_228_0	21	0.8411	1	0.8411	2	1	1	1
Mycobacterium~phage~Dreamboat	RefSeq-85	Caudovirales	Siphoviridae	Unassigned	250_0	Clustered	46	VC_250_0	46	0.4921	1	0.4921	2	2	2	1
Mycobacterium~phage~DS6A	RefSeq-85	Caudovirales	Siphoviridae	Unassigned		Outlier
Mycobacterium~phage~Dumbo	RefSeq-85	Caudovirales	Siphoviridae	Unassigned	228_0	Clustered	21	VC_228_0	21	0.8411	1	0.8411	2	1	1	1
Mycobacterium~phage~Dusk	RefSeq-85	Caudovirales	Siphoviridae	Unassigned	228_0	Clustered	21	VC_228_0	21	0.8411	1	0.8411	2	1	1	1
Mycobacterium~phage~Dylan	RefSeq-85	Caudovirales	Siphoviridae	Unassigned	243_0	Clustered	4	VC_243_0	4	0.3731	0.999987	0.3731	2	1	1	1
Mycobacterium~phage~EagleEye	RefSeq-85	Caudovirales	Siphoviridae	Unassigned	230_1	Clustered	58	VC_230_1	58	0.4877	1	0.4877	2	3	2	0.7647
Mycobacterium~phage~Echild	RefSeq-85	Caudovirales	Siphoviridae	Unassigned	230_1	Clustered	58	VC_230_1	58	0.4877	1	0.4877	2	3	2	0.7647
Mycobacterium~phage~Edtherson	RefSeq-85	Caudovirales	Siphoviridae	Unassigned	250_0	Clustered	46	VC_250_0	46	0.4921	1	0.4921	2	2	2	1
Mycobacterium~phage~Enkosi	RefSeq-85	Caudovirales	Siphoviridae	Unassigned	241_2	Clustered	12	VC_241_2	12	0.4357	1	0.4357	2	1	1	0.9848
Mycobacterium~phage~Equemioh13	RefSeq-85	Caudovirales	Siphoviridae	Unassigned	230_1	Clustered	58	VC_230_1	58	0.4877	1	0.4877	2	3	2	0.7647
Mycobacterium~phage~Eremos	RefSeq-85	Caudovirales	Siphoviridae	Pg1virus	66_1	Clustered	20	VC_66_1	20	0.5117	1	0.5117	2	1	1	1
Mycobacterium~phage~Estave1	RefSeq-85	Caudovirales	Siphoviridae	Unassigned	245_1	Clustered	40	VC_245_1	40	0.7176	1	0.7176	2	2	2	0.8731
Mycobacterium~phage~ET08	RefSeq-85	Caudovirales	Myoviridae	Bxz1virus	275_0	Clustered	19	VC_275_0	19	0.9168	1	0.9168	2	2	2	1
Mycobacterium~phage~EvilGenius	RefSeq-85	Unassigned	Unassigned	Unassigned	230_1	Clustered	58	VC_230_1	58	0.4877	1	0.4877	2	3	2	0.7647
Mycobacterium~phage~First	RefSeq-85	Caudovirales	Siphoviridae	Unassigned	230_1	Clustered	58	VC_230_1	58	0.4877	1	0.4877	2	3	2	0.7647
Mycobacterium~phage~Fishburne	RefSeq-85	Caudovirales	Siphoviridae	Fishburnevirus		Overlap (VC_239/VC_240)
Mycobacterium~phage~FlagStaff	RefSeq-85	Caudovirales	Siphoviridae	Unassigned	242_0	Clustered	9	VC_242_0	9	0.4982	1	0.4982	2	2	2	1
Mycobacterium~phage~Florinda	RefSeq-85	Caudovirales	Siphoviridae	Unassigned	245_1	Clustered	40	VC_245_1	40	0.7176	1	0.7176	2	2	2	0.8731
Mycobacterium~phage~Fredward	RefSeq-85	Caudovirales	Siphoviridae	Unassigned	230_0	Clustered	9	VC_230_0	9	0.0814	1	0.0814	1	1	1	1
Mycobacterium~phage~Gadjet	RefSeq-85	Caudovirales	Siphoviridae	Pipefishvirus	66_0	Clustered	6	VC_66_0	6	0.1761	1	0.1761	2	1	1	1
Mycobacterium~phage~Gaia	RefSeq-85	Caudovirales	Siphoviridae	Gaiavirus		Outlier
Mycobacterium~phage~Gardann	RefSeq-85	Unassigned	Unassigned	Unassigned	233_0	Clustered	9	VC_233_0	9	0.6297	1	0.6297	2	2	2	1
Mycobacterium~phage~Gengar	RefSeq-85	Unassigned	Unassigned	Unassigned	241_1	Clustered	5	VC_241_1	5	0.2195	1	0.2195	2	2	2	1
Mycobacterium~phage~Giles	RefSeq-85	Caudovirales	Siphoviridae	Gilesvirus		Outlier
Mycobacterium~phage~Gizmo	RefSeq-85	Caudovirales	Myoviridae	Bxz1virus	275_0	Clustered	19	VC_275_0	19	0.9168	1	0.9168	2	2	2	1
Mycobacterium~phage~Goku	RefSeq-85	Caudovirales	Siphoviridae	Unassigned	228_0	Clustered	21	VC_228_0	21	0.8411	1	0.8411	2	1	1	1
Mycobacterium~phage~Gompeii16	RefSeq-85	Unassigned	Unassigned	Unassigned	250_0	Clustered	46	VC_250_0	46	0.4921	1	0.4921	2	2	2	1
Mycobacterium~phage~Graduation	RefSeq-85	Caudovirales	Siphoviridae	Unassigned	250_0	Clustered	46	VC_250_0	46	0.4921	1	0.4921	2	2	2	1
Mycobacterium~phage~Gumball	RefSeq-85	Caudovirales	Siphoviridae	Unassigned	203_0	Clustered	5	VC_203_0	5	0.6226	1	0.6226	4	1	1	1
Mycobacterium~phage~Hades	RefSeq-85	Caudovirales	Siphoviridae	Unassigned	245_1	Clustered	40	VC_245_1	40	0.7176	1	0.7176	2	2	2	0.8731
Mycobacterium~phage~Hamulus	RefSeq-85	Caudovirales	Siphoviridae	Unassigned	245_1	Clustered	40	VC_245_1	40	0.7176	1	0.7176	2	2	2	0.8731
Mycobacterium~phage~HanShotFirst	RefSeq-85	Caudovirales	Siphoviridae	Unassigned	250_0	Clustered	46	VC_250_0	46	0.4921	1	0.4921	2	2	2	1
Mycobacterium~phage~Hawkeye	RefSeq-85	Caudovirales	Siphoviridae	Hawkeyevirus	203_0	Clustered	5	VC_203_0	5	0.6226	1	0.6226	4	1	1	1
Mycobacterium~phage~HINdeR	RefSeq-85	Caudovirales	Siphoviridae	Unassigned	230_1	Clustered	58	VC_230_1	58	0.4877	1	0.4877	2	3	2	0.7647
Mycobacterium~phage~Hosp	RefSeq-85	Caudovirales	Siphoviridae	Unassigned	66_2	Clustered	15	VC_66_2	15	0.2794	1	0.2794	3	1	1	0.8
Mycobacterium~phage~HufflyPuff	RefSeq-85	Caudovirales	Siphoviridae	Unassigned	228_0	Clustered	21	VC_228_0	21	0.8411	1	0.8411	2	1	1	1
Mycobacterium~phage~HyRo	RefSeq-85	Caudovirales	Myoviridae	Bxz1virus	275_0	Clustered	19	VC_275_0	19	0.9168	1	0.9168	2	2	2	1
Mycobacterium~phage~Inventum	RefSeq-85	Caudovirales	Siphoviridae	Unassigned	245_1	Clustered	40	VC_245_1	40	0.7176	1	0.7176	2	2	2	0.8731
Mycobacterium~phage~Iracema64	RefSeq-85	Caudovirales	Siphoviridae	Unassigned	230_1	Clustered	58	VC_230_1	58	0.4877	1	0.4877	2	3	2	0.7647
Mycobacterium~phage~Jabbawokkie	RefSeq-85	Caudovirales	Siphoviridae	Unassigned	246_0	Clustered	3	VC_246_0	3	0.0506	0.99856	0.0505	2	1	1	1
Mycobacterium~phage~JacAttac	RefSeq-85	Caudovirales	Siphoviridae	Pg1virus	66_1	Clustered	20	VC_66_1	20	0.5117	1	0.5117	2	1	1	1
Mycobacterium~phage~JAMaL	RefSeq-85	Caudovirales	Siphoviridae	Coopervirus	66_2	Clustered	15	VC_66_2	15	0.2794	1	0.2794	3	1	1	0.8
Mycobacterium~phage~Job42	RefSeq-85	Caudovirales	Siphoviridae	Unassigned	245_1	Clustered	40	VC_245_1	40	0.7176	1	0.7176	2	2	2	0.8731
Mycobacterium~phage~Jobu08	RefSeq-85	Caudovirales	Siphoviridae	Unassigned	230_1	Clustered	58	VC_230_1	58	0.4877	1	0.4877	2	3	2	0.7647
Mycobacterium~phage~Jolie1	RefSeq-85	Caudovirales	Siphoviridae	Unassigned	66_2	Clustered	15	VC_66_2	15	0.2794	1	0.2794	3	1	1	0.8
Mycobacterium~phage~Jolie2	RefSeq-85	Caudovirales	Siphoviridae	Unassigned	242_0	Clustered	9	VC_242_0	9	0.4982	1	0.4982	2	2	2	1
Mycobacterium~phage~Jovo	RefSeq-85	Caudovirales	Siphoviridae	Unassigned	230_0	Clustered	9	VC_230_0	9	0.0814	1	0.0814	1	1	1	1
Mycobacterium~phage~Kampy	RefSeq-85	Caudovirales	Siphoviridae	Unassigned	230_1	Clustered	58	VC_230_1	58	0.4877	1	0.4877	2	3	2	0.7647
Mycobacterium~phage~KayaCho	RefSeq-85	Caudovirales	Siphoviridae	Unassigned	66_2	Clustered	15	VC_66_2	15	0.2794	1	0.2794	3	1	1	0.8
Mycobacterium~phage~Keshu	RefSeq-85	Caudovirales	Siphoviridae	Unassigned	241_2	Clustered	12	VC_241_2	12	0.4357	1	0.4357	2	1	1	0.9848
Mycobacterium~phage~Kikipoo	RefSeq-85	Caudovirales	Siphoviridae	Pg1virus	66_1	Clustered	20	VC_66_1	20	0.5117	1	0.5117	2	1	1	1
Mycobacterium~phage~Kimberlium	RefSeq-85	Caudovirales	Siphoviridae	Unassigned	245_1	Clustered	40	VC_245_1	40	0.7176	1	0.7176	2	2	2	0.8731
Mycobacterium~phage~Konstantine	RefSeq-85	Caudovirales	Siphoviridae	Barnyardvirus	204_0	Clustered	4	VC_204_0	4	0.4692	0.999964	0.4692	2	1	1	1
Mycobacterium~phage~Kratio	RefSeq-85	Caudovirales	Siphoviridae	Unassigned	241_1	Clustered	5	VC_241_1	5	0.2195	1	0.2195	2	2	2	1
Mycobacterium~phage~LadyBird	RefSeq-85	Caudovirales	Siphoviridae	Unassigned	230_1	Clustered	58	VC_230_1	58	0.4877	1	0.4877	2	3	2	0.7647
Mycobacterium~phage~Lamina13	RefSeq-85	Caudovirales	Siphoviridae	Unassigned	250_0	Clustered	46	VC_250_0	46	0.4921	1	0.4921	2	2	2	1
Mycobacterium~phage~Larenn	RefSeq-85	Caudovirales	Siphoviridae	Unassigned	230_1	Clustered	58	VC_230_1	58	0.4877	1	0.4877	2	3	2	0.7647
Mycobacterium~phage~Leo	RefSeq-85	Caudovirales	Siphoviridae	Unassigned	242_0	Clustered	9	VC_242_0	9	0.4982	1	0.4982	2	2	2	1
Mycobacterium~phage~Lilac	RefSeq-85	Caudovirales	Siphoviridae	Unassigned	228_0	Clustered	21	VC_228_0	21	0.8411	1	0.8411	2	1	1	1
Mycobacterium~phage~LinStu	RefSeq-85	Caudovirales	Myoviridae	Bxz1virus	275_0	Clustered	19	VC_275_0	19	0.9168	1	0.9168	2	2	2	1
Mycobacterium~phage~LittleCherry	RefSeq-85	Caudovirales	Siphoviridae	Unassigned	230_0	Clustered	9	VC_230_0	9	0.0814	1	0.0814	1	1	1	1
Mycobacterium~phage~Llama	RefSeq-85	Caudovirales	Siphoviridae	Unassigned	245_1	Clustered	40	VC_245_1	40	0.7176	1	0.7176	2	2	2	0.8731
Mycobacterium~phage~Lolly9	RefSeq-85	Caudovirales	Siphoviridae	Unassigned	233_0	Clustered	9	VC_233_0	9	0.6297	1	0.6297	2	2	2	1
Mycobacterium~phage~Loser	RefSeq-85	Unassigned	Unassigned	Unassigned	230_1	Clustered	58	VC_230_1	58	0.4877	1	0.4877	2	3	2	0.7647
Mycobacterium~phage~Luchador	RefSeq-85	Caudovirales	Siphoviridae	Unassigned	230_1	Clustered	58	VC_230_1	58	0.4877	1	0.4877	2	3	2	0.7647
Mycobacterium~phage~Makemake	RefSeq-85	Unassigned	Unassigned	Unassigned	250_0	Clustered	46	VC_250_0	46	0.4921	1	0.4921	2	2	2	1
Mycobacterium~phage~Malithi	RefSeq-85	Caudovirales	Siphoviridae	Fishburnevirus		Overlap (VC_239/VC_240)
Mycobacterium~phage~Manad	RefSeq-85	Caudovirales	Siphoviridae	Pg1virus	66_1	Clustered	20	VC_66_1	20	0.5117	1	0.5117	2	1	1	1
Mycobacterium~phage~MarQuardt	RefSeq-85	Caudovirales	Siphoviridae	Unassigned	230_1	Clustered	58	VC_230_1	58	0.4877	1	0.4877	2	3	2	0.7647
Mycobacterium~phage~MiaZeal	RefSeq-85	Caudovirales	Siphoviridae	Unassigned	234_0	Clustered	3	VC_234_0	3	0.0787	0.998068	0.0786	2	1	1	1
Mycobacterium~phage~MichelleMyBell	RefSeq-85	Caudovirales	Siphoviridae	Buttersvirus	239_0	Clustered	8	VC_239_0	8	0.2354	1	0.2354	4	1	1	1
Mycobacterium~phage~Milly	RefSeq-85	Caudovirales	Siphoviridae	Unassigned	241_2	Clustered	12	VC_241_2	12	0.4357	1	0.4357	2	1	1	0.9848
Mycobacterium~phage~Mindy	RefSeq-85	Caudovirales	Siphoviridae	Unassigned	228_0	Clustered	21	VC_228_0	21	0.8411	1	0.8411	2	1	1	1
Mycobacterium~phage~Minerva	RefSeq-85	Caudovirales	Siphoviridae	Unassigned	234_1	Clustered	2	VC_234_1	2	0.0375	0.950522	0.0357	1	1	1	1
Mycobacterium~phage~MoMoMixon	RefSeq-85	Caudovirales	Myoviridae	Bxz1virus	275_0	Clustered	19	VC_275_0	19	0.9168	1	0.9168	2	2	2	1
Mycobacterium~phage~MOOREtheMARYer	RefSeq-85	Caudovirales	Siphoviridae	Unassigned	242_0	Clustered	9	VC_242_0	9	0.4982	1	0.4982	2	2	2	1
Mycobacterium~phage~MosMoris	RefSeq-85	Caudovirales	Siphoviridae	Marvinvirus		Outlier
Mycobacterium~phage~Muddy	RefSeq-85	Caudovirales	Siphoviridae	Ff47virus	244_0	Clustered	2	VC_244_0	2	0.1251	0.956836	0.1197	1	1	1	1
Mycobacterium~phage~Mufasa	RefSeq-85	Caudovirales	Siphoviridae	Unassigned	241_2	Clustered	12	VC_241_2	12	0.4357	1	0.4357	2	1	1	0.9848
Mycobacterium~phage~Mulciber	RefSeq-85	Unassigned	Unassigned	Unassigned	230_1	Clustered	58	VC_230_1	58	0.4877	1	0.4877	2	3	2	0.7647
Mycobacterium~phage~Murphy	RefSeq-85	Caudovirales	Siphoviridae	Unassigned	228_0	Clustered	21	VC_228_0	21	0.8411	1	0.8411	2	1	1	1
Mycobacterium~phage~Murucutumbu	RefSeq-85	Caudovirales	Siphoviridae	Unassigned	241_2	Clustered	12	VC_241_2	12	0.4357	1	0.4357	2	1	1	0.9848
Mycobacterium~phage~Myrna	RefSeq-85	Caudovirales	Myoviridae	Unassigned		Outlier
Mycobacterium~phage~Nala	RefSeq-85	Caudovirales	Siphoviridae	Unassigned	228_0	Clustered	21	VC_228_0	21	0.8411	1	0.8411	2	1	1	1
Mycobacterium~phage~Nappy	RefSeq-85	Caudovirales	Myoviridae	Bxz1virus	275_0	Clustered	19	VC_275_0	19	0.9168	1	0.9168	2	2	2	1
Mycobacterium~phage~NelitzaMV	RefSeq-85	Caudovirales	Siphoviridae	Unassigned	228_0	Clustered	21	VC_228_0	21	0.8411	1	0.8411	2	1	1	1
Mycobacterium~phage~Nerujay	RefSeq-85	Caudovirales	Siphoviridae	Unassigned	250_0	Clustered	46	VC_250_0	46	0.4921	1	0.4921	2	2	2	1
Mycobacterium~phage~Newman	RefSeq-85	Caudovirales	Siphoviridae	Pg1virus	66_1	Clustered	20	VC_66_1	20	0.5117	1	0.5117	2	1	1	1
Mycobacterium~phage~Nhonho	RefSeq-85	Caudovirales	Siphoviridae	Unassigned	250_0	Clustered	46	VC_250_0	46	0.4921	1	0.4921	2	2	2	1
Mycobacterium~phage~Nigel	RefSeq-85	Caudovirales	Siphoviridae	Coopervirus	66_2	Clustered	15	VC_66_2	15	0.2794	1	0.2794	3	1	1	0.8
Mycobacterium~phage~Nyxis	RefSeq-85	Caudovirales	Siphoviridae	Unassigned	230_1	Clustered	58	VC_230_1	58	0.4877	1	0.4877	2	3	2	0.7647
Mycobacterium~phage~Oaker	RefSeq-85	Caudovirales	Siphoviridae	Unassigned	204_0	Clustered	4	VC_204_0	4	0.4692	0.999964	0.4692	2	1	1	1
Mycobacterium~phage~Obama12	RefSeq-85	Caudovirales	Siphoviridae	Unassigned	230_1	Clustered	58	VC_230_1	58	0.4877	1	0.4877	2	3	2	0.7647
Mycobacterium~phage~OkiRoe	RefSeq-85	Caudovirales	Siphoviridae	Unassigned	241_1	Clustered	5	VC_241_1	5	0.2195	1	0.2195	2	2	2	1
Mycobacterium~phage~Oline	RefSeq-85	Caudovirales	Siphoviridae	Pg1virus	66_1	Clustered	20	VC_66_1	20	0.5117	1	0.5117	2	1	1	1
Mycobacterium~phage~Omnicron	RefSeq-85	Caudovirales	Siphoviridae	Unassigned	241_1	Clustered	5	VC_241_1	5	0.2195	1	0.2195	2	2	2	1
Mycobacterium~phage~Orion	RefSeq-85	Caudovirales	Siphoviridae	Pg1virus	66_1	Clustered	20	VC_66_1	20	0.5117	1	0.5117	2	1	1	1
Mycobacterium~phage~OSmaximus	RefSeq-85	Caudovirales	Siphoviridae	Pg1virus	66_1	Clustered	20	VC_66_1	20	0.5117	1	0.5117	2	1	1	1
Mycobacterium~phage~Ovechkin	RefSeq-85	Caudovirales	Siphoviridae	Unassigned	245_1	Clustered	40	VC_245_1	40	0.7176	1	0.7176	2	2	2	0.8731
Mycobacterium~phage~Panchino	RefSeq-85	Caudovirales	Siphoviridae	Redivirus	239_0	Clustered	8	VC_239_0	8	0.2354	1	0.2354	4	1	1	1
Mycobacterium~phage~Papez	RefSeq-85	Unassigned	Unassigned	Unassigned	250_0	Clustered	46	VC_250_0	46	0.4921	1	0.4921	2	2	2	1
Mycobacterium~phage~Papyrus	RefSeq-85	Caudovirales	Siphoviridae	Send513virus		Outlier
Mycobacterium~phage~Pari	RefSeq-85	Caudovirales	Siphoviridae	Unassigned	250_0	Clustered	46	VC_250_0	46	0.4921	1	0.4921	2	2	2	1
Mycobacterium~phage~Patience	RefSeq-85	Caudovirales	Siphoviridae	Patiencevirus		Outlier
Mycobacterium~phage~PattyP	RefSeq-85	Caudovirales	Siphoviridae	Unassigned	250_0	Clustered	46	VC_250_0	46	0.4921	1	0.4921	2	2	2	1
Mycobacterium~phage~PBI1	RefSeq-85	Caudovirales	Siphoviridae	Pbi1virus	203_0	Clustered	5	VC_203_0	5	0.6226	1	0.6226	4	1	1	1
Mycobacterium~phage~PegLeg	RefSeq-85	Caudovirales	Siphoviridae	Unassigned	229_0	Clustered	2	VC_229_0	2	0.0461	0.955724	0.0441	2	1	1	1
Mycobacterium~phage~Pepe	RefSeq-85	Caudovirales	Siphoviridae	Unassigned	250_0	Clustered	46	VC_250_0	46	0.4921	1	0.4921	2	2	2	1
Mycobacterium~phage~Phaedrus	RefSeq-85	Caudovirales	Siphoviridae	Unassigned	66_0	Clustered	6	VC_66_0	6	0.1761	1	0.1761	2	1	1	1
Mycobacterium~phage~Phantastic	RefSeq-85	Caudovirales	Siphoviridae	Unassigned	230_1	Clustered	58	VC_230_1	58	0.4877	1	0.4877	2	3	2	0.7647
Mycobacterium~phage~PhatBacter	RefSeq-85	Caudovirales	Siphoviridae	Unassigned	228_0	Clustered	21	VC_228_0	21	0.8411	1	0.8411	2	1	1	1
Mycobacterium~phage~Phatniss	RefSeq-85	Caudovirales	Siphoviridae	Unassigned	245_1	Clustered	40	VC_245_1	40	0.7176	1	0.7176	2	2	2	0.8731
Mycobacterium~phage~Phaux	RefSeq-85	Caudovirales	Siphoviridae	Unassigned	228_0	Clustered	21	VC_228_0	21	0.8411	1	0.8411	2	1	1	1
Mycobacterium~phage~Phayonce	RefSeq-85	Caudovirales	Siphoviridae	Phayoncevirus		Overlap (VC_239/VC_240)
Mycobacterium~phage~Phelemich	RefSeq-85	Caudovirales	Siphoviridae	Unassigned	66_2	Clustered	15	VC_66_2	15	0.2794	1	0.2794	3	1	1	0.8
Mycobacterium~phage~Phipps	RefSeq-85	Caudovirales	Siphoviridae	Pg1virus	66_1	Clustered	20	VC_66_1	20	0.5117	1	0.5117	2	1	1	1
Mycobacterium~phage~Phlei	RefSeq-85	Caudovirales	Podoviridae	Unassigned	230_1	Clustered	58	VC_230_1	58	0.4877	1	0.4877	2	3	2	0.7647
Mycobacterium~phage~Phlyer	RefSeq-85	Caudovirales	Siphoviridae	Unassigned	66_0	Clustered	6	VC_66_0	6	0.1761	1	0.1761	2	1	1	1
Mycobacterium~phage~Phrann	RefSeq-85	Caudovirales	Siphoviridae	Redivirus	239_0	Clustered	8	VC_239_0	8	0.2354	1	0.2354	4	1	1	1
Mycobacterium~phage~PhrostyMug	RefSeq-85	Caudovirales	Siphoviridae	Unassigned	250_0	Clustered	46	VC_250_0	46	0.4921	1	0.4921	2	2	2	1
Mycobacterium~phage~Phrux	RefSeq-85	Caudovirales	Siphoviridae	Unassigned	228_0	Clustered	21	VC_228_0	21	0.8411	1	0.8411	2	1	1	1
Mycobacterium~phage~Pinto	RefSeq-85	Caudovirales	Siphoviridae	Unassigned	250_0	Clustered	46	VC_250_0	46	0.4921	1	0.4921	2	2	2	1
Mycobacterium~phage~Pioneer	RefSeq-85	Caudovirales	Siphoviridae	Unassigned	230_1	Clustered	58	VC_230_1	58	0.4877	1	0.4877	2	3	2	0.7647
Mycobacterium~phage~Pipefish	RefSeq-85	Caudovirales	Siphoviridae	Pipefishvirus	66_0	Clustered	6	VC_66_0	6	0.1761	1	0.1761	2	1	1	1
Mycobacterium~phage~Piro94	RefSeq-85	Caudovirales	Siphoviridae	Unassigned	230_1	Clustered	58	VC_230_1	58	0.4877	1	0.4877	2	3	2	0.7647
Mycobacterium~phage~Pleione	RefSeq-85	Caudovirales	Myoviridae	Bxz1virus	275_0	Clustered	19	VC_275_0	19	0.9168	1	0.9168	2	2	2	1
Mycobacterium~phage~PLot	RefSeq-85	Caudovirales	Siphoviridae	Plotvirus	203_0	Clustered	5	VC_203_0	5	0.6226	1	0.6226	4	1	1	1
Mycobacterium~phage~Pops	RefSeq-85	Caudovirales	Siphoviridae	Pg1virus	66_1	Clustered	20	VC_66_1	20	0.5117	1	0.5117	2	1	1	1
Mycobacterium~phage~PopTart	RefSeq-85	Caudovirales	Siphoviridae	Unassigned	245_1	Clustered	40	VC_245_1	40	0.7176	1	0.7176	2	2	2	0.8731
Mycobacterium~phage~Predator	RefSeq-85	Caudovirales	Siphoviridae	Barnyardvirus	204_0	Clustered	4	VC_204_0	4	0.4692	0.999964	0.4692	2	1	1	1
Mycobacterium~phage~Quico	RefSeq-85	Caudovirales	Siphoviridae	Unassigned	245_1	Clustered	40	VC_245_1	40	0.7176	1	0.7176	2	2	2	0.8731
Mycobacterium~phage~Quink	RefSeq-85	Caudovirales	Siphoviridae	Unassigned	228_0	Clustered	21	VC_228_0	21	0.8411	1	0.8411	2	1	1	1
Mycobacterium~phage~Qyrzula	RefSeq-85	Caudovirales	Siphoviridae	Rosebushvirus		Outlier
Mycobacterium~phage~Redi	RefSeq-85	Caudovirales	Siphoviridae	Redivirus	239_0	Clustered	8	VC_239_0	8	0.2354	1	0.2354	4	1	1	1
Mycobacterium~phage~RedRock	RefSeq-85	Caudovirales	Siphoviridae	L5virus	230_1	Clustered	58	VC_230_1	58	0.4877	1	0.4877	2	3	2	0.7647
Mycobacterium~phage~RhynO	RefSeq-85	Caudovirales	Siphoviridae	Unassigned	230_1	Clustered	58	VC_230_1	58	0.4877	1	0.4877	2	3	2	0.7647
Mycobacterium~phage~RidgeCB	RefSeq-85	Caudovirales	Siphoviridae	L5virus	250_0	Clustered	46	VC_250_0	46	0.4921	1	0.4921	2	2	2	1
Mycobacterium~phage~Rizal	RefSeq-85	Caudovirales	Myoviridae	Bxz1virus	275_0	Clustered	19	VC_275_0	19	0.9168	1	0.9168	2	2	2	1
Mycobacterium~phage~Rosebush	RefSeq-85	Caudovirales	Siphoviridae	Rosebushvirus		Outlier
Mycobacterium~phage~Rufus	RefSeq-85	Caudovirales	Siphoviridae	Unassigned	250_0	Clustered	46	VC_250_0	46	0.4921	1	0.4921	2	2	2	1
Mycobacterium~phage~Saal	RefSeq-85	Caudovirales	Siphoviridae	Unassigned	245_1	Clustered	40	VC_245_1	40	0.7176	1	0.7176	2	2	2	0.8731
Mycobacterium~phage~Sarfire	RefSeq-85	Caudovirales	Siphoviridae	Unassigned	250_0	Clustered	46	VC_250_0	46	0.4921	1	0.4921	2	2	2	1
Mycobacterium~phage~Sbash	RefSeq-85	Caudovirales	Siphoviridae	Che9cvirus	239_2	Clustered	2	VC_239_2	2	0.0377	0.956506	0.036	1	1	1	1
Mycobacterium~phage~ScottMcG	RefSeq-85	Caudovirales	Myoviridae	Bxz1virus	275_0	Clustered	19	VC_275_0	19	0.9168	1	0.9168	2	2	2	1
Mycobacterium~phage~Seabiscuit	RefSeq-85	Caudovirales	Siphoviridae	Unassigned	250_0	Clustered	46	VC_250_0	46	0.4921	1	0.4921	2	2	2	1
Mycobacterium~phage~Seagreen	RefSeq-85	Caudovirales	Siphoviridae	Unassigned	245_1	Clustered	40	VC_245_1	40	0.7176	1	0.7176	2	2	2	0.8731
Mycobacterium~phage~Serenity	RefSeq-85	Caudovirales	Siphoviridae	Unassigned	230_1	Clustered	58	VC_230_1	58	0.4877	1	0.4877	2	3	2	0.7647
Mycobacterium~phage~Severus	RefSeq-85	Caudovirales	Siphoviridae	Unassigned	230_1	Clustered	58	VC_230_1	58	0.4877	1	0.4877	2	3	2	0.7647
Mycobacterium~phage~ShedlockHolmes	RefSeq-85	Caudovirales	Siphoviridae	Unassigned	241_2	Clustered	12	VC_241_2	12	0.4357	1	0.4357	2	1	1	0.9848
Mycobacterium~phage~Sheen	RefSeq-85	Caudovirales	Siphoviridae	Unassigned	230_1	Clustered	58	VC_230_1	58	0.4877	1	0.4877	2	3	2	0.7647
Mycobacterium~phage~Shipwreck	RefSeq-85	Unassigned	Unassigned	Unassigned		Overlap (VC_239/VC_240)
Mycobacterium~phage~ShiVal	RefSeq-85	Caudovirales	Siphoviridae	Pg1virus	66_1	Clustered	20	VC_66_1	20	0.5117	1	0.5117	2	1	1	1
Mycobacterium~phage~SiSi	RefSeq-85	Caudovirales	Siphoviridae	Unassigned	245_1	Clustered	40	VC_245_1	40	0.7176	1	0.7176	2	2	2	0.8731
Mycobacterium~phage~SkiPole	RefSeq-85	Caudovirales	Siphoviridae	L5virus	250_0	Clustered	46	VC_250_0	46	0.4921	1	0.4921	2	2	2	1
Mycobacterium~phage~Smeadley	RefSeq-85	Caudovirales	Siphoviridae	Unassigned	230_0	Clustered	9	VC_230_0	9	0.0814	1	0.0814	1	1	1	1
Mycobacterium~phage~Sneeze	RefSeq-85	Unassigned	Unassigned	Unassigned	242_0	Clustered	9	VC_242_0	9	0.4982	1	0.4982	2	2	2	1
Mycobacterium~phage~Snenia	RefSeq-85	Caudovirales	Siphoviridae	Unassigned	233_0	Clustered	9	VC_233_0	9	0.6297	1	0.6297	2	2	2	1
Mycobacterium~phage~Solon	RefSeq-85	Caudovirales	Siphoviridae	L5virus	250_0	Clustered	46	VC_250_0	46	0.4921	1	0.4921	2	2	2	1
Mycobacterium~phage~Soto	RefSeq-85	Caudovirales	Siphoviridae	Pg1virus	66_1	Clustered	20	VC_66_1	20	0.5117	1	0.5117	2	1	1	1
Mycobacterium~phage~Sparkdehlily	RefSeq-85	Caudovirales	Siphoviridae	Unassigned	245_1	Clustered	40	VC_245_1	40	0.7176	1	0.7176	2	2	2	0.8731
Mycobacterium~phage~Sparky	RefSeq-85	Caudovirales	Siphoviridae	Unassigned		Outlier
Mycobacterium~phage~Spud	RefSeq-85	Caudovirales	Myoviridae	Bxz1virus	275_0	Clustered	19	VC_275_0	19	0.9168	1	0.9168	2	2	2	1
Mycobacterium~phage~Squirty	RefSeq-85	Caudovirales	Siphoviridae	Unassigned		Outlier
Mycobacterium~phage~Stinger	RefSeq-85	Caudovirales	Siphoviridae	Coopervirus	66_2	Clustered	15	VC_66_2	15	0.2794	1	0.2794	3	1	1	0.8
Mycobacterium~phage~Suffolk	RefSeq-85	Caudovirales	Siphoviridae	Pg1virus	66_1	Clustered	20	VC_66_1	20	0.5117	1	0.5117	2	1	1	1
Mycobacterium~phage~SweetiePie	RefSeq-85	Caudovirales	Siphoviridae	Unassigned	230_1	Clustered	58	VC_230_1	58	0.4877	1	0.4877	2	3	2	0.7647
Mycobacterium~phage~Swirley	RefSeq-85	Caudovirales	Siphoviridae	Unassigned	230_0	Clustered	9	VC_230_0	9	0.0814	1	0.0814	1	1	1	1
Mycobacterium~phage~Swish	RefSeq-85	Caudovirales	Siphoviridae	Pg1virus	66_1	Clustered	20	VC_66_1	20	0.5117	1	0.5117	2	1	1	1
Mycobacterium~phage~SWU1	RefSeq-85	Caudovirales	Siphoviridae	L5virus	230_1	Clustered	58	VC_230_1	58	0.4877	1	0.4877	2	3	2	0.7647
Mycobacterium~phage~Taj	RefSeq-85	Caudovirales	Siphoviridae	Che8virus	245_1	Clustered	40	VC_245_1	40	0.7176	1	0.7176	2	2	2	0.8731
Mycobacterium~phage~Tasp14	RefSeq-85	Caudovirales	Siphoviridae	Unassigned	250_0	Clustered	46	VC_250_0	46	0.4921	1	0.4921	2	2	2	1
Mycobacterium~phage~Theia	RefSeq-85	Caudovirales	Siphoviridae	Unassigned	230_0	Clustered	9	VC_230_0	9	0.0814	1	0.0814	1	1	1	1
Mycobacterium~phage~TheloniousMonk	RefSeq-85	Caudovirales	Siphoviridae	Unassigned	250_0	Clustered	46	VC_250_0	46	0.4921	1	0.4921	2	2	2	1
Mycobacterium~phage~Tiffany	RefSeq-85	Caudovirales	Siphoviridae	Unassigned	230_1	Clustered	58	VC_230_1	58	0.4877	1	0.4877	2	3	2	0.7647
Mycobacterium~phage~TM4	RefSeq-85	Caudovirales	Siphoviridae	Tm4virus	241_2	Clustered	12	VC_241_2	12	0.4357	1	0.4357	2	1	1	0.9848
Mycobacterium~phage~Tonenili	RefSeq-85	Unassigned	Unassigned	Unassigned	275_0	Clustered	19	VC_275_0	19	0.9168	1	0.9168	2	2	2	1
Mycobacterium~phage~Toto	RefSeq-85	Caudovirales	Siphoviridae	Cjw1virus	228_0	Clustered	21	VC_228_0	21	0.8411	1	0.8411	2	1	1	1
Mycobacterium~phage~Trike	RefSeq-85	Caudovirales	Siphoviridae	Unassigned	230_1	Clustered	58	VC_230_1	58	0.4877	1	0.4877	2	3	2	0.7647
Mycobacterium~phage~Trixie	RefSeq-85	Caudovirales	Siphoviridae	L5virus	230_1	Clustered	58	VC_230_1	58	0.4877	1	0.4877	2	3	2	0.7647
Mycobacterium~phage~Troll4	RefSeq-85	Caudovirales	Siphoviridae	Unassigned	203_0	Clustered	5	VC_203_0	5	0.6226	1	0.6226	4	1	1	1
Mycobacterium~phage~Trouble	RefSeq-85	Caudovirales	Siphoviridae	Unassigned	250_0	Clustered	46	VC_250_0	46	0.4921	1	0.4921	2	2	2	1
Mycobacterium~phage~Turbido	RefSeq-85	Caudovirales	Siphoviridae	L5virus	230_1	Clustered	58	VC_230_1	58	0.4877	1	0.4877	2	3	2	0.7647
Mycobacterium~phage~Turj99	RefSeq-85	Caudovirales	Siphoviridae	Unassigned	250_0	Clustered	46	VC_250_0	46	0.4921	1	0.4921	2	2	2	1
Mycobacterium~phage~Tweety	RefSeq-85	Caudovirales	Siphoviridae	Che8virus	245_1	Clustered	40	VC_245_1	40	0.7176	1	0.7176	2	2	2	0.8731
Mycobacterium~phage~U2	RefSeq-85	Caudovirales	Siphoviridae	L5virus	250_0	Clustered	46	VC_250_0	46	0.4921	1	0.4921	2	2	2	1
Mycobacterium~phage~UncleHowie	RefSeq-85	Caudovirales	Siphoviridae	Pg1virus	66_1	Clustered	20	VC_66_1	20	0.5117	1	0.5117	2	1	1	1
Mycobacterium~phage~UnionJack	RefSeq-85	Caudovirales	Siphoviridae	Unassigned	230_0	Clustered	9	VC_230_0	9	0.0814	1	0.0814	1	1	1	1
Mycobacterium~phage~Validus	RefSeq-85	Caudovirales	Siphoviridae	Unassigned	241_2	Clustered	12	VC_241_2	12	0.4357	1	0.4357	2	1	1	0.9848
Mycobacterium~phage~vB_MapS_FF47	RefSeq-85	Caudovirales	Siphoviridae	Ff47virus	244_0	Clustered	2	VC_244_0	2	0.1251	0.956836	0.1197	1	1	1	1
Mycobacterium~phage~Velveteen	RefSeq-85	Caudovirales	Siphoviridae	Unassigned	245_0	Clustered	2	VC_245_0	2	0.0216	0.956806	0.0206	1	1	1	1
Mycobacterium~phage~Vincenzo	RefSeq-85	Caudovirales	Siphoviridae	Coopervirus	66_2	Clustered	15	VC_66_2	15	0.2794	1	0.2794	3	1	1	0.8
Mycobacterium~phage~Violet	RefSeq-85	Caudovirales	Siphoviridae	L5virus	250_0	Clustered	46	VC_250_0	46	0.4921	1	0.4921	2	2	2	1
Mycobacterium~phage~Vista	RefSeq-85	Caudovirales	Siphoviridae	Pg1virus	66_1	Clustered	20	VC_66_1	20	0.5117	1	0.5117	2	1	1	1
Mycobacterium~phage~VohminGhazi	RefSeq-85	Caudovirales	Siphoviridae	Unassigned	230_1	Clustered	58	VC_230_1	58	0.4877	1	0.4877	2	3	2	0.7647
Mycobacterium~phage~Vortex	RefSeq-85	Caudovirales	Siphoviridae	Unassigned	66_1	Clustered	20	VC_66_1	20	0.5117	1	0.5117	2	1	1	1
Mycobacterium~phage~Wanda	RefSeq-85	Caudovirales	Siphoviridae	Unassigned	234_1	Clustered	2	VC_234_1	2	0.0375	0.950522	0.0357	1	1	1	1
Mycobacterium~phage~Wee	RefSeq-85	Caudovirales	Siphoviridae	Che8virus	245_1	Clustered	40	VC_245_1	40	0.7176	1	0.7176	2	2	2	0.8731
Mycobacterium~phage~Wheeler	RefSeq-85	Caudovirales	Siphoviridae	Unassigned	250_0	Clustered	46	VC_250_0	46	0.4921	1	0.4921	2	2	2	1
Mycobacterium~phage~Whirlwind	RefSeq-85	Caudovirales	Siphoviridae	Unassigned	233_0	Clustered	9	VC_233_0	9	0.6297	1	0.6297	2	2	2	1
Mycobacterium~phage~Wildcat	RefSeq-85	Caudovirales	Siphoviridae	Wildcatvirus	229_0	Clustered	2	VC_229_0	2	0.0461	0.955724	0.0441	2	1	1	1
Mycobacterium~phage~Wile	RefSeq-85	Caudovirales	Siphoviridae	Unassigned	230_1	Clustered	58	VC_230_1	58	0.4877	1	0.4877	2	3	2	0.7647
Mycobacterium~phage~WIVsmall	RefSeq-85	Caudovirales	Siphoviridae	Unassigned		Outlier
Mycobacterium~phage~Xeno	RefSeq-85	Caudovirales	Siphoviridae	Charlievirus	239_0	Clustered	8	VC_239_0	8	0.2354	1	0.2354	4	1	1	1
Mycobacterium~phage~XFactor	RefSeq-85	Caudovirales	Siphoviridae	Unassigned	245_1	Clustered	40	VC_245_1	40	0.7176	1	0.7176	2	2	2	0.8731
Mycobacterium~phage~Zaka	RefSeq-85	Caudovirales	Siphoviridae	Unassigned	230_1	Clustered	58	VC_230_1	58	0.4877	1	0.4877	2	3	2	0.7647
Mycobacterium~phage~ZoeJ	RefSeq-85	Caudovirales	Siphoviridae	Unassigned	241_2	Clustered	12	VC_241_2	12	0.4357	1	0.4357	2	1	1	0.9848
Mycobacterium~virus~244	RefSeq-85	Caudovirales	Siphoviridae	Cjw1virus	228_0	Clustered	21	VC_228_0	21	0.8411	1	0.8411	2	1	1	1
Mycobacterium~virus~Acadian	RefSeq-85	Caudovirales	Siphoviridae	Acadianvirus	66_2	Clustered	15	VC_66_2	15	0.2794	1	0.2794	3	1	1	0.8
Mycobacterium~virus~Alma	RefSeq-85	Caudovirales	Siphoviridae	L5virus	230_1	Clustered	58	VC_230_1	58	0.4877	1	0.4877	2	3	2	0.7647
Mycobacterium~virus~Angelica	RefSeq-85	Caudovirales	Siphoviridae	Tm4virus	241_2	Clustered	12	VC_241_2	12	0.4357	1	0.4357	2	1	1	0.9848
Mycobacterium~virus~Ardmore	RefSeq-85	Caudovirales	Siphoviridae	Che8virus	245_1	Clustered	40	VC_245_1	40	0.7176	1	0.7176	2	2	2	0.8731
Mycobacterium~virus~Avani	RefSeq-85	Caudovirales	Siphoviridae	Che8virus	246_0	Clustered	3	VC_246_0	3	0.0506	0.99856	0.0505	2	1	1	1
Mycobacterium~virus~Babsiella	RefSeq-85	Caudovirales	Siphoviridae	Brujitavirus	239_1	Clustered	2	VC_239_1	2	0.0346	0.956622	0.0331	1	1	1	1
Mycobacterium~virus~Bethlehem	RefSeq-85	Caudovirales	Siphoviridae	L5virus	250_0	Clustered	46	VC_250_0	46	0.4921	1	0.4921	2	2	2	1
Mycobacterium~virus~Billknuckles	RefSeq-85	Caudovirales	Siphoviridae	L5virus	250_0	Clustered	46	VC_250_0	46	0.4921	1	0.4921	2	2	2	1
Mycobacterium~virus~Boomer	RefSeq-85	Caudovirales	Siphoviridae	Che8virus	245_1	Clustered	40	VC_245_1	40	0.7176	1	0.7176	2	2	2	0.8731
Mycobacterium~virus~Bron	RefSeq-85	Caudovirales	Siphoviridae	Bronvirus	233_0	Clustered	9	VC_233_0	9	0.6297	1	0.6297	2	2	2	1
Mycobacterium~virus~Brujita	RefSeq-85	Caudovirales	Siphoviridae	Brujitavirus	239_1	Clustered	2	VC_239_1	2	0.0346	0.956622	0.0331	1	1	1	1
Mycobacterium~virus~Bruns	RefSeq-85	Caudovirales	Siphoviridae	L5virus	250_0	Clustered	46	VC_250_0	46	0.4921	1	0.4921	2	2	2	1
Mycobacterium~virus~Bxb1	RefSeq-85	Caudovirales	Siphoviridae	L5virus	250_0	Clustered	46	VC_250_0	46	0.4921	1	0.4921	2	2	2	1
Mycobacterium~virus~Bxz2	RefSeq-85	Caudovirales	Siphoviridae	L5virus	230_1	Clustered	58	VC_230_1	58	0.4877	1	0.4877	2	3	2	0.7647
Mycobacterium~virus~Che12	RefSeq-85	Caudovirales	Siphoviridae	L5virus	230_1	Clustered	58	VC_230_1	58	0.4877	1	0.4877	2	3	2	0.7647
Mycobacterium~virus~Che8	RefSeq-85	Caudovirales	Siphoviridae	Che8virus	245_1	Clustered	40	VC_245_1	40	0.7176	1	0.7176	2	2	2	0.8731
Mycobacterium~virus~Che9c	RefSeq-85	Caudovirales	Siphoviridae	Che9cvirus	239_2	Clustered	2	VC_239_2	2	0.0377	0.956506	0.036	1	1	1	1
Mycobacterium~virus~Che9d	RefSeq-85	Caudovirales	Siphoviridae	Che8virus	246_0	Clustered	3	VC_246_0	3	0.0506	0.99856	0.0505	2	1	1	1
Mycobacterium~virus~CJW1	RefSeq-85	Caudovirales	Siphoviridae	Cjw1virus	228_0	Clustered	21	VC_228_0	21	0.8411	1	0.8411	2	1	1	1
Mycobacterium~virus~Corndog	RefSeq-85	Caudovirales	Siphoviridae	Corndogvirus	243_0	Clustered	4	VC_243_0	4	0.3731	0.999987	0.3731	2	1	1	1
Mycobacterium~virus~Courthouse	RefSeq-85	Caudovirales	Siphoviridae	Omegavirus	234_0	Clustered	3	VC_234_0	3	0.0787	0.998068	0.0786	2	1	1	1
Mycobacterium~virus~Crimd	RefSeq-85	Caudovirales	Siphoviridae	Tm4virus	241_2	Clustered	12	VC_241_2	12	0.4357	1	0.4357	2	1	1	0.9848
Mycobacterium~virus~D29	RefSeq-85	Caudovirales	Siphoviridae	L5virus	230_1	Clustered	58	VC_230_1	58	0.4877	1	0.4877	2	3	2	0.7647
Mycobacterium~virus~Deadp	RefSeq-85	Caudovirales	Siphoviridae	Che8virus	245_1	Clustered	40	VC_245_1	40	0.7176	1	0.7176	2	2	2	0.8731
Mycobacterium~virus~Doom	RefSeq-85	Caudovirales	Siphoviridae	L5virus	250_0	Clustered	46	VC_250_0	46	0.4921	1	0.4921	2	2	2	1
Mycobacterium~virus~Drago	RefSeq-85	Caudovirales	Siphoviridae	Che8virus	245_1	Clustered	40	VC_245_1	40	0.7176	1	0.7176	2	2	2	0.8731
Mycobacterium~virus~Euphoria	RefSeq-85	Caudovirales	Siphoviridae	L5virus	250_0	Clustered	46	VC_250_0	46	0.4921	1	0.4921	2	2	2	1
Mycobacterium~virus~Faith1	RefSeq-85	Caudovirales	Siphoviridae	Bronvirus	233_0	Clustered	9	VC_233_0	9	0.6297	1	0.6297	2	2	2	1
Mycobacterium~virus~Fionnbarth	RefSeq-85	Caudovirales	Siphoviridae	Tm4virus	241_0	Clustered	2	VC_241_0	2	0.0635	0.956992	0.0607	2	1	1	1
Mycobacterium~virus~Firecracker	RefSeq-85	Caudovirales	Siphoviridae	Corndogvirus	243_0	Clustered	4	VC_243_0	4	0.3731	0.999987	0.3731	2	1	1	1
Mycobacterium~virus~Fruitloop	RefSeq-85	Caudovirales	Siphoviridae	Che8virus	245_1	Clustered	40	VC_245_1	40	0.7176	1	0.7176	2	2	2	0.8731
Mycobacterium~virus~Gumbie	RefSeq-85	Caudovirales	Siphoviridae	Che8virus	245_1	Clustered	40	VC_245_1	40	0.7176	1	0.7176	2	2	2	0.8731
Mycobacterium~virus~Halo	RefSeq-85	Caudovirales	Siphoviridae	Liefievirus	242_0	Clustered	9	VC_242_0	9	0.4982	1	0.4982	2	2	2	1
Mycobacterium~virus~Jasper	RefSeq-85	Caudovirales	Siphoviridae	L5virus	250_0	Clustered	46	VC_250_0	46	0.4921	1	0.4921	2	2	2	1
Mycobacterium~virus~KBG	RefSeq-85	Caudovirales	Siphoviridae	L5virus	250_0	Clustered	46	VC_250_0	46	0.4921	1	0.4921	2	2	2	1
Mycobacterium~virus~Kostya	RefSeq-85	Caudovirales	Siphoviridae	Cjw1virus	228_0	Clustered	21	VC_228_0	21	0.8411	1	0.8411	2	1	1	1
Mycobacterium~virus~Kugel	RefSeq-85	Caudovirales	Siphoviridae	L5virus	250_0	Clustered	46	VC_250_0	46	0.4921	1	0.4921	2	2	2	1
Mycobacterium~virus~L5	RefSeq-85	Caudovirales	Siphoviridae	L5virus	230_1	Clustered	58	VC_230_1	58	0.4877	1	0.4877	2	3	2	0.7647
Mycobacterium~virus~Larva	RefSeq-85	Caudovirales	Siphoviridae	Tm4virus	241_1	Clustered	5	VC_241_1	5	0.2195	1	0.2195	2	2	2	1
Mycobacterium~virus~Liefie	RefSeq-85	Caudovirales	Siphoviridae	Liefievirus	242_0	Clustered	9	VC_242_0	9	0.4982	1	0.4982	2	2	2	1
Mycobacterium~virus~Llij	RefSeq-85	Caudovirales	Siphoviridae	Che8virus	245_1	Clustered	40	VC_245_1	40	0.7176	1	0.7176	2	2	2	0.8731
Mycobacterium~virus~Lockley	RefSeq-85	Caudovirales	Siphoviridae	L5virus	250_0	Clustered	46	VC_250_0	46	0.4921	1	0.4921	2	2	2	1
Mycobacterium~virus~Pacc40	RefSeq-85	Caudovirales	Siphoviridae	Che8virus	245_1	Clustered	40	VC_245_1	40	0.7176	1	0.7176	2	2	2	0.8731
Mycobacterium~virus~Peaches	RefSeq-85	Caudovirales	Siphoviridae	L5virus	230_1	Clustered	58	VC_230_1	58	0.4877	1	0.4877	2	3	2	0.7647
Mycobacterium~virus~Perseus	RefSeq-85	Caudovirales	Siphoviridae	L5virus	250_0	Clustered	46	VC_250_0	46	0.4921	1	0.4921	2	2	2	1
Mycobacterium~virus~PMC	RefSeq-85	Caudovirales	Siphoviridae	Che8virus	245_1	Clustered	40	VC_245_1	40	0.7176	1	0.7176	2	2	2	0.8731
Mycobacterium~virus~Porky	RefSeq-85	Caudovirales	Siphoviridae	Cjw1virus	228_0	Clustered	21	VC_228_0	21	0.8411	1	0.8411	2	1	1	1
Mycobacterium~virus~Pukovnik	RefSeq-85	Caudovirales	Siphoviridae	L5virus	230_1	Clustered	58	VC_230_1	58	0.4877	1	0.4877	2	3	2	0.7647
Mycobacterium~virus~Ramsey	RefSeq-85	Caudovirales	Siphoviridae	Che8virus	245_1	Clustered	40	VC_245_1	40	0.7176	1	0.7176	2	2	2	0.8731
Mycobacterium~virus~Rumpelstiltskin	RefSeq-85	Caudovirales	Siphoviridae	Bronvirus	233_0	Clustered	9	VC_233_0	9	0.6297	1	0.6297	2	2	2	1
Mycobacterium~virus~SG4	RefSeq-85	Caudovirales	Siphoviridae	Che8virus	245_1	Clustered	40	VC_245_1	40	0.7176	1	0.7176	2	2	2	0.8731
Mycoplasma~phage~MAV1	RefSeq-85	Unassigned	Unassigned	Unassigned		Singleton
Mycoplasma~phage~phiMFV1	RefSeq-85	Unassigned	Unassigned	Unassigned		Singleton
Mycoplasma~virus~P1	RefSeq-85	Caudovirales	Podoviridae	Unassigned		Singleton
Myxococcus~phage~Mx8	RefSeq-85	Caudovirales	Podoviridae	Unassigned		Outlier
Natrialba~phage~PhiCh1	RefSeq-85	Caudovirales	Myoviridae	Unassigned		Outlier
Nitrincola~phage~1M3-16	RefSeq-85	Unassigned	Unassigned	Unassigned		Outlier
Nocardia~phage~NBR1	RefSeq-85	Caudovirales	Siphoviridae	Unassigned		Outlier
Nonlabens~phage~P12024L	RefSeq-85	Caudovirales	Siphoviridae	P12024virus	223_0	Clustered	2	VC_223_0	2	0.9668	0.729854	0.7056	1	1	1	1
Nonlabens~phage~P12024S	RefSeq-85	Caudovirales	Siphoviridae	P12024virus	223_0	Clustered	2	VC_223_0	2	0.9668	0.729854	0.7056	1	1	1	1
Oenococcus~phage~phi9805	RefSeq-85	Unassigned	Unassigned	Unassigned	158_0	Clustered	3	VC_158_0	3	0.4982	0.997756	0.4971	1	1	1	1
Oenococcus~phage~phiS11	RefSeq-85	Unassigned	Unassigned	Unassigned	158_0	Clustered	3	VC_158_0	3	0.4982	0.997756	0.4971	1	1	1	1
Oenococcus~phage~phiS13	RefSeq-85	Unassigned	Unassigned	Unassigned	158_0	Clustered	3	VC_158_0	3	0.4982	0.997756	0.4971	1	1	1	1
Paenibacillus~phage~Diva	RefSeq-85	Caudovirales	Siphoviridae	Sitaravirus	87_0	Clustered	7	VC_87_0	7	0.5712	1	0.5712	2	2	1	1
Paenibacillus~phage~Fern	RefSeq-85	Caudovirales	Siphoviridae	Sitaravirus	87_0	Clustered	7	VC_87_0	7	0.5712	1	0.5712	2	2	1	1
Paenibacillus~phage~Harrison	RefSeq-85	Caudovirales	Siphoviridae	Harrisonvirus		Outlier
Paenibacillus~phage~HB10c2	RefSeq-85	Caudovirales	Siphoviridae	Sitaravirus	87_0	Clustered	7	VC_87_0	7	0.5712	1	0.5712	2	2	1	1
Paenibacillus~phage~PG1	RefSeq-85	Caudovirales	Siphoviridae	Unassigned		Outlier
Paenibacillus~phage~phiIBB_Pl23	RefSeq-85	Caudovirales	Unassigned	Unassigned	87_0	Clustered	7	VC_87_0	7	0.5712	1	0.5712	2	2	1	1
Paenibacillus~phage~Rani	RefSeq-85	Caudovirales	Siphoviridae	Sitaravirus	87_0	Clustered	7	VC_87_0	7	0.5712	1	0.5712	2	2	1	1
Paenibacillus~phage~Sitara	RefSeq-85	Caudovirales	Siphoviridae	Sitaravirus	87_0	Clustered	7	VC_87_0	7	0.5712	1	0.5712	2	2	1	1
Paenibacillus~phage~Tripp	RefSeq-85	Caudovirales	Siphoviridae	Unassigned		Outlier
Paenibacillus~phage~Vegas	RefSeq-85	Caudovirales	Siphoviridae	Vegasvirus		Outlier
Paenibacillus~phage~Xenia	RefSeq-85	Caudovirales	Siphoviridae	Unassigned	87_0	Clustered	7	VC_87_0	7	0.5712	1	0.5712	2	2	1	1
Pantoea~phage~LIMElight	RefSeq-85	Caudovirales	Podoviridae	Phikmvvirus		Outlier
Pantoea~phage~LIMEzero	RefSeq-85	Caudovirales	Podoviridae	Phikmvvirus		Outlier
Parabacteroides~phage~YZ-2015a	RefSeq-85	Unassigned	Microviridae	Unassigned	192_0	Clustered	2	VC_192_0	2	0.4184	0.969766	0.4058	1	1	1	1
Parabacteroides~phage~YZ-2015b	RefSeq-85	Unassigned	Microviridae	Unassigned	192_0	Clustered	2	VC_192_0	2	0.4184	0.969766	0.4058	1	1	1	1
Paracoccus~phage~vB_PmaS_IMEP1	RefSeq-85	Caudovirales	Siphoviridae	Unassigned		Outlier
Pasteurella~phage~F108	RefSeq-85	Caudovirales	Myoviridae	Hp1virus	70_0	Clustered	7	VC_70_0	7	0.5714	1	0.5714	2	2	2	1
Pectobacterium~phage~My1	RefSeq-85	Caudovirales	Siphoviridae	Unassigned		Outlier
Pectobacterium~phage~Peat1	RefSeq-85	Caudovirales	Podoviridae	Unassigned		Outlier
Pectobacterium~phage~phiTE	RefSeq-85	Caudovirales	Myoviridae	Cr3virus		Overlap (VC_58/VC_69)
Pectobacterium~phage~PM1	RefSeq-85	Caudovirales	Myoviridae	Unassigned	53_0	Clustered	5	VC_53_0	5	0.9799	0.999938	0.9798	1	1	1	1
Pectobacterium~phage~PP1	RefSeq-85	Caudovirales	Podoviridae	Unassigned	30_0	Clustered	15	VC_30_0	15	0.4346	1	0.4346	2	2	2	1
Pectobacterium~phage~PP16	RefSeq-85	Unassigned	Unassigned	Unassigned		Outlier
Pectobacterium~phage~PP90	RefSeq-85	Unassigned	Unassigned	Unassigned		Outlier
Pectobacterium~phage~ZF40	RefSeq-85	Caudovirales	Myoviridae	Unassigned		Outlier
Pediococcus~virus~cIP1	RefSeq-85	Caudovirales	Siphoviridae	Phijl1virus	144_0	Clustered	3	VC_144_0	3	0.6892	0.997841	0.6877	1	1	1	1
Pelagibacter~phage~HTVC008M	RefSeq-85	Caudovirales	Myoviridae	Unassigned		Outlier
Pelagibacter~phage~HTVC010P	RefSeq-85	Caudovirales	Podoviridae	Unassigned		Outlier
Pelagibacter~phage~HTVC011P	RefSeq-85	Caudovirales	Podoviridae	Unassigned		Outlier
Pelagibacter~phage~HTVC019P	RefSeq-85	Caudovirales	Podoviridae	Unassigned		Outlier
Phage~Gifsy-1	RefSeq-85	Unassigned	Unassigned	Unassigned		Overlap (VC_75/VC_173)
Phage~Gifsy-2	RefSeq-85	Unassigned	Unassigned	Unassigned		Overlap (VC_75/VC_173)
Phage~MP22	RefSeq-85	Caudovirales	Siphoviridae	D3112virus	168_0	Clustered	18	VC_168_0	18	0.7972	1	0.7972	2	2	2	1
Phage~phiJL001	RefSeq-85	Caudovirales	Siphoviridae	Yuavirus		Outlier
Phormidium~phage~MIS-PhV1A	RefSeq-85	Unassigned	Unassigned	Unassigned	276_0	Clustered	2	VC_276_0	2	1	1	1	1	1	1	1
Phormidium~phage~MIS-PhV1B	RefSeq-85	Unassigned	Unassigned	Unassigned	276_0	Clustered	2	VC_276_0	2	1	1	1	1	1	1	1
Phormidium~phage~Pf-WMP3	RefSeq-85	Caudovirales	Podoviridae	Unassigned	78_0	Clustered	2	VC_78_0	2	0.5249	0.868224	0.4557	1	1	1	1
Phormidium~phage~Pf-WMP4	RefSeq-85	Caudovirales	Podoviridae	Unassigned		Outlier
Planktothrix~phage~PaV-LD	RefSeq-85	Caudovirales	Podoviridae	Unassigned		Singleton
Podovirus~Lau218	RefSeq-85	Caudovirales	Podoviridae	Unassigned		Outlier
Polaribacter~phage~P12002L	RefSeq-85	Caudovirales	Siphoviridae	P12002virus	277_0	Clustered	2	VC_277_0	2	1	1	1	1	1	1	1
Polaribacter~phage~P12002S	RefSeq-85	Caudovirales	Siphoviridae	P12002virus	277_0	Clustered	2	VC_277_0	2	1	1	1	1	1	1	1
Prochlorococcus~phage~MED4-184	RefSeq-85	Caudovirales	Myoviridae	Unassigned	171_0	Clustered	2	VC_171_0	2	0.702	0.879217	0.6172	1	2	2	1
Prochlorococcus~phage~MED4-213	RefSeq-85	Caudovirales	Myoviridae	Unassigned	40_0	Clustered	3	VC_40_0	3	0.0296	0.998598	0.0296	1	1	1	1
Prochlorococcus~phage~P-GSP1	RefSeq-85	Unassigned	Unassigned	Unassigned	179_0	Clustered	17	VC_179_0	17	0.3821	1	0.3821	1	2	2	1
Prochlorococcus~phage~P-HM1	RefSeq-85	Caudovirales	Myoviridae	Unassigned	40_0	Clustered	3	VC_40_0	3	0.0296	0.998598	0.0296	1	1	1	1
Prochlorococcus~phage~P-HM2	RefSeq-85	Caudovirales	Myoviridae	Unassigned	40_0	Clustered	3	VC_40_0	3	0.0296	0.998598	0.0296	1	1	1	1
Prochlorococcus~phage~P-SSM3	RefSeq-85	Caudovirales	Myoviridae	Unassigned	40_14	Clustered	2	VC_40_14	2	0.0115	0.95525	0.0109	1	1	1	1
Prochlorococcus~phage~P-SSM4	RefSeq-85	Caudovirales	Myoviridae	Unassigned	40_14	Clustered	2	VC_40_14	2	0.0115	0.95525	0.0109	1	1	1	1
Prochlorococcus~phage~P-SSP10	RefSeq-85	Caudovirales	Podoviridae	Unassigned	179_0	Clustered	17	VC_179_0	17	0.3821	1	0.3821	1	2	2	1
Prochlorococcus~phage~P-SSP3	RefSeq-85	Unassigned	Unassigned	Unassigned	179_0	Clustered	17	VC_179_0	17	0.3821	1	0.3821	1	2	2	1
Prochlorococcus~phage~P-SSP7	RefSeq-85	Caudovirales	Podoviridae	Unassigned	179_0	Clustered	17	VC_179_0	17	0.3821	1	0.3821	1	2	2	1
Prochlorococcus~phage~Syn33	RefSeq-85	Caudovirales	Unassigned	Unassigned	40_8	Clustered	7	VC_40_8	7	0.0656	1	0.0656	1	2	1	0.7619
Propionibacterium~phage~ATCC29399B_C	RefSeq-85	Caudovirales	Siphoviridae	Pa6virus	86_0	Clustered	59	VC_86_0	59	0.9928	1	0.9928	2	2	2	1
Propionibacterium~phage~ATCC29399B_T	RefSeq-85	Caudovirales	Siphoviridae	Pa6virus	86_0	Clustered	59	VC_86_0	59	0.9928	1	0.9928	2	2	2	1
Propionibacterium~phage~Attacne	RefSeq-85	Caudovirales	Siphoviridae	Pa6virus	86_0	Clustered	59	VC_86_0	59	0.9928	1	0.9928	2	2	2	1
Propionibacterium~phage~B5	RefSeq-85	Unassigned	Inoviridae	Unassigned		Singleton
Propionibacterium~phage~BruceLethal	RefSeq-85	Unassigned	Unassigned	Unassigned	86_0	Clustered	59	VC_86_0	59	0.9928	1	0.9928	2	2	2	1
Propionibacterium~phage~Enoki	RefSeq-85	Unassigned	Unassigned	Unassigned	86_0	Clustered	59	VC_86_0	59	0.9928	1	0.9928	2	2	2	1
Propionibacterium~phage~Kubed	RefSeq-85	Caudovirales	Siphoviridae	Pa6virus	86_0	Clustered	59	VC_86_0	59	0.9928	1	0.9928	2	2	2	1
Propionibacterium~phage~Lauchelly	RefSeq-85	Caudovirales	Siphoviridae	Pa6virus	86_0	Clustered	59	VC_86_0	59	0.9928	1	0.9928	2	2	2	1
Propionibacterium~phage~Moyashi	RefSeq-85	Unassigned	Unassigned	Unassigned	86_0	Clustered	59	VC_86_0	59	0.9928	1	0.9928	2	2	2	1
Propionibacterium~phage~MrAK	RefSeq-85	Caudovirales	Siphoviridae	Pa6virus	86_0	Clustered	59	VC_86_0	59	0.9928	1	0.9928	2	2	2	1
Propionibacterium~phage~Ouroboros	RefSeq-85	Caudovirales	Siphoviridae	Pa6virus	86_0	Clustered	59	VC_86_0	59	0.9928	1	0.9928	2	2	2	1
Propionibacterium~phage~P1.1	RefSeq-85	Caudovirales	Siphoviridae	Pa6virus	86_0	Clustered	59	VC_86_0	59	0.9928	1	0.9928	2	2	2	1
Propionibacterium~phage~P100_1	RefSeq-85	Caudovirales	Siphoviridae	Pa6virus	86_0	Clustered	59	VC_86_0	59	0.9928	1	0.9928	2	2	2	1
Propionibacterium~phage~P100_A	RefSeq-85	Caudovirales	Siphoviridae	Pa6virus	86_0	Clustered	59	VC_86_0	59	0.9928	1	0.9928	2	2	2	1
Propionibacterium~phage~P100D	RefSeq-85	Caudovirales	Siphoviridae	Pa6virus	86_0	Clustered	59	VC_86_0	59	0.9928	1	0.9928	2	2	2	1
Propionibacterium~phage~P101A	RefSeq-85	Caudovirales	Siphoviridae	Pa6virus	86_0	Clustered	59	VC_86_0	59	0.9928	1	0.9928	2	2	2	1
Propionibacterium~phage~P104A	RefSeq-85	Caudovirales	Siphoviridae	Pa6virus	86_0	Clustered	59	VC_86_0	59	0.9928	1	0.9928	2	2	2	1
Propionibacterium~phage~P105	RefSeq-85	Caudovirales	Siphoviridae	Pa6virus	86_0	Clustered	59	VC_86_0	59	0.9928	1	0.9928	2	2	2	1
Propionibacterium~phage~P14.4	RefSeq-85	Caudovirales	Siphoviridae	Pa6virus	86_0	Clustered	59	VC_86_0	59	0.9928	1	0.9928	2	2	2	1
Propionibacterium~phage~P9.1	RefSeq-85	Caudovirales	Siphoviridae	Pa6virus	86_0	Clustered	59	VC_86_0	59	0.9928	1	0.9928	2	2	2	1
Propionibacterium~phage~PA1-14	RefSeq-85	Caudovirales	Siphoviridae	Unassigned	86_0	Clustered	59	VC_86_0	59	0.9928	1	0.9928	2	2	2	1
Propionibacterium~phage~PA6	RefSeq-85	Caudovirales	Siphoviridae	Pa6virus	86_0	Clustered	59	VC_86_0	59	0.9928	1	0.9928	2	2	2	1
Propionibacterium~phage~PAC1	RefSeq-85	Caudovirales	Siphoviridae	Unassigned	86_0	Clustered	59	VC_86_0	59	0.9928	1	0.9928	2	2	2	1
Propionibacterium~phage~Pacnes~2012-15	RefSeq-85	Caudovirales	Siphoviridae	Pa6virus	86_0	Clustered	59	VC_86_0	59	0.9928	1	0.9928	2	2	2	1
Propionibacterium~phage~PAD20	RefSeq-85	Caudovirales	Siphoviridae	Pa6virus	86_0	Clustered	59	VC_86_0	59	0.9928	1	0.9928	2	2	2	1
Propionibacterium~phage~PAS50	RefSeq-85	Caudovirales	Siphoviridae	Pa6virus	86_0	Clustered	59	VC_86_0	59	0.9928	1	0.9928	2	2	2	1
Propionibacterium~phage~PFR1	RefSeq-85	Caudovirales	Siphoviridae	Pfr1virus	273_0	Clustered	2	VC_273_0	2	0.9839	0.729854	0.7181	2	2	2	1
Propionibacterium~phage~PFR2	RefSeq-85	Unassigned	Unassigned	Unassigned	273_0	Clustered	2	VC_273_0	2	0.9839	0.729854	0.7181	2	2	2	1
Propionibacterium~phage~PHL009M11	RefSeq-85	Caudovirales	Siphoviridae	Pa6virus	86_0	Clustered	59	VC_86_0	59	0.9928	1	0.9928	2	2	2	1
Propionibacterium~phage~PHL010M04	RefSeq-85	Caudovirales	Siphoviridae	Unassigned	86_0	Clustered	59	VC_86_0	59	0.9928	1	0.9928	2	2	2	1
Propionibacterium~phage~PHL025M00	RefSeq-85	Caudovirales	Siphoviridae	Pa6virus	86_0	Clustered	59	VC_86_0	59	0.9928	1	0.9928	2	2	2	1
Propionibacterium~phage~PHL030N00	RefSeq-85	Caudovirales	Siphoviridae	Unassigned	86_0	Clustered	59	VC_86_0	59	0.9928	1	0.9928	2	2	2	1
Propionibacterium~phage~PHL041M10	RefSeq-85	Caudovirales	Siphoviridae	Pa6virus	86_0	Clustered	59	VC_86_0	59	0.9928	1	0.9928	2	2	2	1
Propionibacterium~phage~PHL055N00	RefSeq-85	Caudovirales	Siphoviridae	Unassigned	86_0	Clustered	59	VC_86_0	59	0.9928	1	0.9928	2	2	2	1
Propionibacterium~phage~PHL060L00	RefSeq-85	Caudovirales	Siphoviridae	Pa6virus	86_0	Clustered	59	VC_86_0	59	0.9928	1	0.9928	2	2	2	1
Propionibacterium~phage~PHL067M10	RefSeq-85	Caudovirales	Siphoviridae	Unassigned	86_0	Clustered	59	VC_86_0	59	0.9928	1	0.9928	2	2	2	1
Propionibacterium~phage~PHL070N00	RefSeq-85	Caudovirales	Siphoviridae	Pa6virus	86_0	Clustered	59	VC_86_0	59	0.9928	1	0.9928	2	2	2	1
Propionibacterium~phage~PHL071N05	RefSeq-85	Caudovirales	Siphoviridae	Pa6virus	86_0	Clustered	59	VC_86_0	59	0.9928	1	0.9928	2	2	2	1
Propionibacterium~phage~PHL082M00	RefSeq-85	Caudovirales	Siphoviridae	Unassigned	86_0	Clustered	59	VC_86_0	59	0.9928	1	0.9928	2	2	2	1
Propionibacterium~phage~PHL085N00	RefSeq-85	Caudovirales	Siphoviridae	Unassigned	86_0	Clustered	59	VC_86_0	59	0.9928	1	0.9928	2	2	2	1
Propionibacterium~phage~PHL092M00	RefSeq-85	Caudovirales	Siphoviridae	Pa6virus	86_0	Clustered	59	VC_86_0	59	0.9928	1	0.9928	2	2	2	1
Propionibacterium~phage~PHL095N00	RefSeq-85	Caudovirales	Siphoviridae	Pa6virus	86_0	Clustered	59	VC_86_0	59	0.9928	1	0.9928	2	2	2	1
Propionibacterium~phage~PHL111M01	RefSeq-85	Caudovirales	Siphoviridae	Pa6virus	86_0	Clustered	59	VC_86_0	59	0.9928	1	0.9928	2	2	2	1
Propionibacterium~phage~PHL112N00	RefSeq-85	Caudovirales	Siphoviridae	Pa6virus	86_0	Clustered	59	VC_86_0	59	0.9928	1	0.9928	2	2	2	1
Propionibacterium~phage~PHL113M01	RefSeq-85	Caudovirales	Siphoviridae	Pa6virus	86_0	Clustered	59	VC_86_0	59	0.9928	1	0.9928	2	2	2	1
Propionibacterium~phage~PHL114L00	RefSeq-85	Caudovirales	Siphoviridae	Pa6virus	86_0	Clustered	59	VC_86_0	59	0.9928	1	0.9928	2	2	2	1
Propionibacterium~phage~PHL116M00	RefSeq-85	Caudovirales	Siphoviridae	Pa6virus	86_0	Clustered	59	VC_86_0	59	0.9928	1	0.9928	2	2	2	1
Propionibacterium~phage~PHL132N00	RefSeq-85	Caudovirales	Siphoviridae	Pa6virus	86_0	Clustered	59	VC_86_0	59	0.9928	1	0.9928	2	2	2	1
Propionibacterium~phage~PHL141N00	RefSeq-85	Caudovirales	Siphoviridae	Pa6virus	86_0	Clustered	59	VC_86_0	59	0.9928	1	0.9928	2	2	2	1
Propionibacterium~phage~PHL150M00	RefSeq-85	Caudovirales	Siphoviridae	Unassigned	86_0	Clustered	59	VC_86_0	59	0.9928	1	0.9928	2	2	2	1
Propionibacterium~phage~PHL152M00	RefSeq-85	Caudovirales	Siphoviridae	Pa6virus	86_0	Clustered	59	VC_86_0	59	0.9928	1	0.9928	2	2	2	1
Propionibacterium~phage~PHL171M01	RefSeq-85	Caudovirales	Siphoviridae	Pa6virus	86_0	Clustered	59	VC_86_0	59	0.9928	1	0.9928	2	2	2	1
Propionibacterium~phage~PHL179M00	RefSeq-85	Caudovirales	Siphoviridae	Pa6virus	86_0	Clustered	59	VC_86_0	59	0.9928	1	0.9928	2	2	2	1
Propionibacterium~phage~PHL199M00	RefSeq-85	Caudovirales	Siphoviridae	Pa6virus	86_0	Clustered	59	VC_86_0	59	0.9928	1	0.9928	2	2	2	1
Propionibacterium~phage~PHL301M00	RefSeq-85	Caudovirales	Siphoviridae	Pa6virus	86_0	Clustered	59	VC_86_0	59	0.9928	1	0.9928	2	2	2	1
Propionibacterium~phage~Pirate	RefSeq-85	Caudovirales	Siphoviridae	Pa6virus	86_0	Clustered	59	VC_86_0	59	0.9928	1	0.9928	2	2	2	1
Propionibacterium~phage~Procrass1	RefSeq-85	Caudovirales	Siphoviridae	Pa6virus	86_0	Clustered	59	VC_86_0	59	0.9928	1	0.9928	2	2	2	1
Propionibacterium~phage~QueenBey	RefSeq-85	Unassigned	Unassigned	Unassigned	86_0	Clustered	59	VC_86_0	59	0.9928	1	0.9928	2	2	2	1
Propionibacterium~phage~SKKY	RefSeq-85	Caudovirales	Siphoviridae	Pa6virus	86_0	Clustered	59	VC_86_0	59	0.9928	1	0.9928	2	2	2	1
Propionibacterium~phage~Solid	RefSeq-85	Caudovirales	Siphoviridae	Pa6virus	86_0	Clustered	59	VC_86_0	59	0.9928	1	0.9928	2	2	2	1
Propionibacterium~phage~Stormborn	RefSeq-85	Caudovirales	Siphoviridae	Pa6virus	86_0	Clustered	59	VC_86_0	59	0.9928	1	0.9928	2	2	2	1
Propionibacterium~phage~Wizzo	RefSeq-85	Caudovirales	Siphoviridae	Pa6virus	86_0	Clustered	59	VC_86_0	59	0.9928	1	0.9928	2	2	2	1
Proteus~phage~PM~75	RefSeq-85	Caudovirales	Podoviridae	Unassigned		Outlier
Proteus~phage~PM~85	RefSeq-85	Caudovirales	Podoviridae	Unassigned	30_0	Clustered	15	VC_30_0	15	0.4346	1	0.4346	2	2	2	1
Proteus~phage~PM~93	RefSeq-85	Caudovirales	Podoviridae	Unassigned	30_0	Clustered	15	VC_30_0	15	0.4346	1	0.4346	2	2	2	1
Proteus~phage~PM16	RefSeq-85	Caudovirales	Podoviridae	Unassigned		Outlier
Proteus~phage~pPM_01	RefSeq-85	Caudovirales	Siphoviridae	Unassigned		Outlier
Proteus~phage~vB_PmiM_Pm5461	RefSeq-85	Caudovirales	Myoviridae	Unassigned	35_20	Clustered	2	VC_35_20	2	0.0068	0.957588	0.0065	1	2	2	1
Proteus~phage~vB_PmiP_Pm5460	RefSeq-85	Caudovirales	Podoviridae	Unassigned	30_0	Clustered	15	VC_30_0	15	0.4346	1	0.4346	2	2	2	1
Providencia~phage~Redjac	RefSeq-85	Caudovirales	Unassigned	Unassigned		Outlier
Pseudoalteromonas~phage~BS5	RefSeq-85	Unassigned	Unassigned	Unassigned	5_0	Clustered	2	VC_5_0	2	0.2043	0.950553	0.1942	1	2	2	1
Pseudoalteromonas~phage~H101	RefSeq-85	Caudovirales	Myoviridae	Unassigned		Outlier
Pseudoalteromonas~phage~H103	RefSeq-85	Caudovirales	Unassigned	Unassigned	166_0	Clustered	3	VC_166_0	3	0.1512	0.978394	0.1479	1	2	1	1
Pseudoalteromonas~phage~H105/1	RefSeq-85	Caudovirales	Siphoviridae	Unassigned	5_0	Clustered	2	VC_5_0	2	0.2043	0.950553	0.1942	1	2	2	1
Pseudoalteromonas~phage~PH1	RefSeq-85	Unassigned	Unassigned	Unassigned	211_0	Clustered	3	VC_211_0	3	1	1	1	2	2	2	1
Pseudoalteromonas~phage~PM2	RefSeq-85	Unassigned	Corticoviridae	Corticovirus		Singleton
Pseudoalteromonas~phage~Pq0	RefSeq-85	Caudovirales	Siphoviridae	Unassigned		Overlap (VC_6/VC_78)
Pseudoalteromonas~phage~pYD6-A	RefSeq-85	Caudovirales	Podoviridae	Unassigned	9_0	Clustered	3	VC_9_0	3	0.228	0.998349	0.2276	1	1	1	1
Pseudoalteromonas~phage~RIO-1	RefSeq-85	Caudovirales	Podoviridae	Unassigned		Outlier
Pseudomonad~phage~gh-1	RefSeq-85	Caudovirales	Podoviridae	T7virus	34_0	Clustered	57	VC_34_0	57	0.8041	1	0.8041	3	2	2	1
Pseudomonas~phage~119X	RefSeq-85	Caudovirales	Podoviridae	Unassigned	278_0	Clustered	2	VC_278_0	2	1	1	1	1	1	1	1
Pseudomonas~phage~14-1	RefSeq-85	Caudovirales	Myoviridae	Pbunavirus	76_0	Clustered	13	VC_76_0	13	0.8701	1	0.8701	2	1	1	1
Pseudomonas~phage~201phi2-1	RefSeq-85	Caudovirales	Myoviridae	Unassigned		Overlap (VC_98/VC_207)
Pseudomonas~phage~73	RefSeq-85	Caudovirales	Siphoviridae	Septima3virus	1_0	Clustered	6	VC_1_0	6	0.4766	1	0.4766	2	1	1	1
Pseudomonas~phage~AF	RefSeq-85	Caudovirales	Podoviridae	Unassigned		Outlier
Pseudomonas~phage~Andromeda	RefSeq-85	Unassigned	Unassigned	Unassigned	28_0	Clustered	10	VC_28_0	10	0.2287	1	0.2287	2	2	2	1
Pseudomonas~phage~B3	RefSeq-85	Caudovirales	Siphoviridae	Unassigned	169_0	Clustered	4	VC_169_0	4	0.2163	0.999983	0.2163	1	2	2	1
Pseudomonas~phage~Bf7	RefSeq-85	Caudovirales	Podoviridae	Unassigned	28_0	Clustered	10	VC_28_0	10	0.2287	1	0.2287	2	2	2	1
Pseudomonas~phage~C11	RefSeq-85	Caudovirales	Myoviridae	Unassigned	55_0	Clustered	12	VC_55_0	12	0.644	1	0.644	2	2	2	1
Pseudomonas~phage~CHA_P1	RefSeq-85	Caudovirales	Myoviridae	Kpp10virus		Overlap (VC_56/VC_57)
Pseudomonas~phage~DL54	RefSeq-85	Caudovirales	Podoviridae	Unassigned	193_0	Clustered	9	VC_193_0	9	0.8322	1	0.8322	2	1	1	1
Pseudomonas~phage~DL60	RefSeq-85	Caudovirales	Myoviridae	Pbunavirus	76_0	Clustered	13	VC_76_0	13	0.8701	1	0.8701	2	1	1	1
Pseudomonas~phage~DL62	RefSeq-85	Caudovirales	Podoviridae	Unassigned	31_0	Clustered	11	VC_31_0	11	0.4604	1	0.4604	2	1	1	1
Pseudomonas~phage~DL64	RefSeq-85	Caudovirales	Podoviridae	Unassigned	10_0	Clustered	8	VC_10_0	8	0.4732	1	0.4732	2	2	2	1
Pseudomonas~phage~DL68	RefSeq-85	Caudovirales	Myoviridae	Pbunavirus	76_0	Clustered	13	VC_76_0	13	0.8701	1	0.8701	2	1	1	1
Pseudomonas~phage~EL	RefSeq-85	Caudovirales	Myoviridae	Elvirus		Outlier
Pseudomonas~phage~F10	RefSeq-85	Caudovirales	Siphoviridae	Unassigned	163_0	Clustered	3	VC_163_0	3	0.5371	0.997723	0.5359	1	2	2	1
Pseudomonas~phage~F8	RefSeq-85	Caudovirales	Myoviridae	Pbunavirus	76_0	Clustered	13	VC_76_0	13	0.8701	1	0.8701	2	1	1	1
Pseudomonas~phage~H70	RefSeq-85	Caudovirales	Siphoviridae	Unassigned	168_0	Clustered	18	VC_168_0	18	0.7972	1	0.7972	2	2	2	1
Pseudomonas~phage~JBD18	RefSeq-85	Unassigned	Unassigned	Unassigned	169_0	Clustered	4	VC_169_0	4	0.2163	0.999983	0.2163	1	2	2	1
Pseudomonas~phage~JBD24	RefSeq-85	Caudovirales	Siphoviridae	Unassigned	168_0	Clustered	18	VC_168_0	18	0.7972	1	0.7972	2	2	2	1
Pseudomonas~phage~JBD25	RefSeq-85	Unassigned	Unassigned	Unassigned	169_0	Clustered	4	VC_169_0	4	0.2163	0.999983	0.2163	1	2	2	1
Pseudomonas~phage~JBD30	RefSeq-85	Caudovirales	Siphoviridae	Unassigned	168_0	Clustered	18	VC_168_0	18	0.7972	1	0.7972	2	2	2	1
Pseudomonas~phage~JBD5	RefSeq-85	Caudovirales	Siphoviridae	Unassigned	168_0	Clustered	18	VC_168_0	18	0.7972	1	0.7972	2	2	2	1
Pseudomonas~phage~JBD69	RefSeq-85	Unassigned	Unassigned	Unassigned	168_0	Clustered	18	VC_168_0	18	0.7972	1	0.7972	2	2	2	1
Pseudomonas~phage~JBD88a	RefSeq-85	Caudovirales	Siphoviridae	Unassigned	168_0	Clustered	18	VC_168_0	18	0.7972	1	0.7972	2	2	2	1
Pseudomonas~phage~JBD93	RefSeq-85	Unassigned	Unassigned	Unassigned	168_0	Clustered	18	VC_168_0	18	0.7972	1	0.7972	2	2	2	1
Pseudomonas~phage~JD024	RefSeq-85	Caudovirales	Siphoviridae	Unassigned	168_0	Clustered	18	VC_168_0	18	0.7972	1	0.7972	2	2	2	1
Pseudomonas~phage~JG004	RefSeq-85	Caudovirales	Myoviridae	Pakpunavirus	55_0	Clustered	12	VC_55_0	12	0.644	1	0.644	2	2	2	1
Pseudomonas~phage~JG024	RefSeq-85	Caudovirales	Myoviridae	Pbunavirus	76_0	Clustered	13	VC_76_0	13	0.8701	1	0.8701	2	1	1	1
Pseudomonas~phage~K5	RefSeq-85	Unassigned	Unassigned	Unassigned	55_0	Clustered	12	VC_55_0	12	0.644	1	0.644	2	2	2	1
Pseudomonas~phage~K8	RefSeq-85	Caudovirales	Myoviridae	Unassigned	55_0	Clustered	12	VC_55_0	12	0.644	1	0.644	2	2	2	1
Pseudomonas~phage~KPP10	RefSeq-85	Caudovirales	Myoviridae	Kpp10virus		Overlap (VC_56/VC_57)
Pseudomonas~phage~KPP12	RefSeq-85	Caudovirales	Myoviridae	Pbunavirus	76_0	Clustered	13	VC_76_0	13	0.8701	1	0.8701	2	1	1	1
Pseudomonas~phage~KPP21	RefSeq-85	Caudovirales	Podoviridae	Luz7virus	11_0	Clustered	2	VC_11_0	2	0.0892	0.954113	0.0851	1	1	1	1
Pseudomonas~phage~KPP25	RefSeq-85	Caudovirales	Podoviridae	Kpp25virus		Singleton
Pseudomonas~phage~LBL3	RefSeq-85	Caudovirales	Myoviridae	Pbunavirus	76_0	Clustered	13	VC_76_0	13	0.8701	1	0.8701	2	1	1	1
Pseudomonas~phage~LIT1	RefSeq-85	Caudovirales	Podoviridae	Lit1virus	10_0	Clustered	8	VC_10_0	8	0.4732	1	0.4732	2	2	2	1
Pseudomonas~phage~LKA1	RefSeq-85	Caudovirales	Podoviridae	Phikmvvirus		Outlier
Pseudomonas~phage~LKD16	RefSeq-85	Caudovirales	Podoviridae	Unassigned	31_0	Clustered	11	VC_31_0	11	0.4604	1	0.4604	2	1	1	1
Pseudomonas~phage~LMA2	RefSeq-85	Caudovirales	Myoviridae	Pbunavirus	76_0	Clustered	13	VC_76_0	13	0.8701	1	0.8701	2	1	1	1
Pseudomonas~phage~Lu11	RefSeq-85	Caudovirales	Myoviridae	Unassigned	263_0	Clustered	2	VC_263_0	2	0.6771	0.729854	0.4942	1	1	1	1
Pseudomonas~phage~LUZ19	RefSeq-85	Caudovirales	Podoviridae	Unassigned	31_0	Clustered	11	VC_31_0	11	0.4604	1	0.4604	2	1	1	1
Pseudomonas~phage~LUZ24	RefSeq-85	Caudovirales	Podoviridae	Luz24virus	193_0	Clustered	9	VC_193_0	9	0.8322	1	0.8322	2	1	1	1
Pseudomonas~phage~LUZ7	RefSeq-85	Caudovirales	Podoviridae	Luz7virus	11_0	Clustered	2	VC_11_0	2	0.0892	0.954113	0.0851	1	1	1	1
Pseudomonas~phage~M6	RefSeq-85	Caudovirales	Siphoviridae	Yuavirus	2_1	Clustered	4	VC_2_1	4	0.4473	0.999984	0.4473	1	1	1	1
Pseudomonas~phage~MD8	RefSeq-85	Unassigned	Unassigned	Unassigned	163_0	Clustered	3	VC_163_0	3	0.5371	0.997723	0.5359	1	2	2	1
Pseudomonas~phage~MP1412	RefSeq-85	Caudovirales	Siphoviridae	Yuavirus	2_1	Clustered	4	VC_2_1	4	0.4473	0.999984	0.4473	1	1	1	1
Pseudomonas~phage~MP42	RefSeq-85	Caudovirales	Siphoviridae	Unassigned	168_0	Clustered	18	VC_168_0	18	0.7972	1	0.7972	2	2	2	1
Pseudomonas~phage~MP48	RefSeq-85	Caudovirales	Siphoviridae	Unassigned	168_0	Clustered	18	VC_168_0	18	0.7972	1	0.7972	2	2	2	1
Pseudomonas~phage~MPK6	RefSeq-85	Caudovirales	Podoviridae	Unassigned	31_0	Clustered	11	VC_31_0	11	0.4604	1	0.4604	2	1	1	1
Pseudomonas~phage~MPK7	RefSeq-85	Caudovirales	Podoviridae	Unassigned	31_0	Clustered	11	VC_31_0	11	0.4604	1	0.4604	2	1	1	1
Pseudomonas~phage~NH-4	RefSeq-85	Caudovirales	Myoviridae	Unassigned	76_0	Clustered	13	VC_76_0	13	0.8701	1	0.8701	2	1	1	1
Pseudomonas~phage~NP1	RefSeq-85	Caudovirales	Siphoviridae	Np1virus		Outlier
Pseudomonas~phage~O4	RefSeq-85	Unassigned	Unassigned	Unassigned	180_0	Clustered	4	VC_180_0	4	0.4979	0.999973	0.4979	1	2	2	1
Pseudomonas~phage~OBP	RefSeq-85	Caudovirales	Myoviridae	Unassigned		Outlier
Pseudomonas~phage~PA11	RefSeq-85	Unassigned	Unassigned	Unassigned	180_0	Clustered	4	VC_180_0	4	0.4979	0.999973	0.4979	1	2	2	1
Pseudomonas~phage~Pa2	RefSeq-85	Caudovirales	Podoviridae	Unassigned	10_0	Clustered	8	VC_10_0	8	0.4732	1	0.4732	2	2	2	1
Pseudomonas~phage~PaBG	RefSeq-85	Caudovirales	Myoviridae	Unassigned	263_0	Clustered	2	VC_263_0	2	0.6771	0.729854	0.4942	1	1	1	1
Pseudomonas~phage~PAE1	RefSeq-85	Caudovirales	Siphoviridae	Yuavirus	2_1	Clustered	4	VC_2_1	4	0.4473	0.999984	0.4473	1	1	1	1
Pseudomonas~phage~PAK_P1	RefSeq-85	Caudovirales	Myoviridae	Pakpunavirus	55_0	Clustered	12	VC_55_0	12	0.644	1	0.644	2	2	2	1
Pseudomonas~phage~PAK_P2	RefSeq-85	Caudovirales	Myoviridae	Unassigned	55_0	Clustered	12	VC_55_0	12	0.644	1	0.644	2	2	2	1
Pseudomonas~phage~PAK_P3	RefSeq-85	Caudovirales	Myoviridae	Kpp10virus		Overlap (VC_56/VC_57)
Pseudomonas~phage~PAK_P4	RefSeq-85	Caudovirales	Myoviridae	Pakpunavirus	55_0	Clustered	12	VC_55_0	12	0.644	1	0.644	2	2	2	1
Pseudomonas~phage~PAK_P5	RefSeq-85	Caudovirales	Myoviridae	Kpp10virus		Overlap (VC_56/VC_57)
Pseudomonas~phage~PaMx11	RefSeq-85	Caudovirales	Siphoviridae	Ab18virus	2_0	Clustered	2	VC_2_0	2	0.1818	0.954229	0.1735	1	1	1	1
Pseudomonas~phage~PaMx28	RefSeq-85	Caudovirales	Siphoviridae	Pamx74virus	3_0	Clustered	2	VC_3_0	2	0.1615	0.955126	0.1542	1	1	1	1
Pseudomonas~phage~PaMx42	RefSeq-85	Caudovirales	Siphoviridae	Unassigned	1_0	Clustered	6	VC_1_0	6	0.4766	1	0.4766	2	1	1	1
Pseudomonas~phage~PaMx74	RefSeq-85	Caudovirales	Siphoviridae	Pamx74virus	3_0	Clustered	2	VC_3_0	2	0.1615	0.955126	0.1542	1	1	1	1
Pseudomonas~phage~PaoP5	RefSeq-85	Caudovirales	Myoviridae	Unassigned	55_0	Clustered	12	VC_55_0	12	0.644	1	0.644	2	2	2	1
Pseudomonas~phage~PaP1	RefSeq-85	Caudovirales	Myoviridae	Pakpunavirus	55_0	Clustered	12	VC_55_0	12	0.644	1	0.644	2	2	2	1
Pseudomonas~phage~PaP2	RefSeq-85	Caudovirales	Podoviridae	Unassigned	278_0	Clustered	2	VC_278_0	2	1	1	1	1	1	1	1
Pseudomonas~phage~PaP3	RefSeq-85	Caudovirales	Podoviridae	Luz24virus	193_0	Clustered	9	VC_193_0	9	0.8322	1	0.8322	2	1	1	1
Pseudomonas~phage~PB1	RefSeq-85	Caudovirales	Myoviridae	Pbunavirus	76_0	Clustered	13	VC_76_0	13	0.8701	1	0.8701	2	1	1	1
Pseudomonas~phage~PEV2	RefSeq-85	Caudovirales	Podoviridae	Lit1virus	10_0	Clustered	8	VC_10_0	8	0.4732	1	0.4732	2	2	2	1
Pseudomonas~phage~Pf1	RefSeq-85	Unassigned	Inoviridae	Unassigned		Singleton
Pseudomonas~phage~Pf-10	RefSeq-85	Caudovirales	Podoviridae	Unassigned	34_0	Clustered	57	VC_34_0	57	0.8041	1	0.8041	3	2	2	1
Pseudomonas~phage~Pf3	RefSeq-85	Unassigned	Inoviridae	Unassigned		Singleton
Pseudomonas~phage~phi12	RefSeq-85	Unassigned	Cystoviridae	Cystovirus	280_0	Clustered	2	VC_280_0	2	0.6972	0.5	0.3486	1	1	1	1
Pseudomonas~phage~phi13	RefSeq-85	Unassigned	Cystoviridae	Cystovirus	279_0	Clustered	2	VC_279_0	2	0.6334	0.5	0.3167	1	1	1	1
Pseudomonas~phage~phi15	RefSeq-85	Caudovirales	Podoviridae	Unassigned	34_0	Clustered	57	VC_34_0	57	0.8041	1	0.8041	3	2	2	1
Pseudomonas~phage~phi2	RefSeq-85	Unassigned	Unassigned	Unassigned	163_0	Clustered	3	VC_163_0	3	0.5371	0.997723	0.5359	1	2	2	1
Pseudomonas~phage~phi-2	RefSeq-85	Caudovirales	Podoviridae	Unassigned		Outlier
Pseudomonas~phage~phi2954	RefSeq-85	Unassigned	Cystoviridae	Cystovirus	280_0	Clustered	2	VC_280_0	2	0.6972	0.5	0.3486	1	1	1	1
Pseudomonas~phage~phi297	RefSeq-85	Caudovirales	Siphoviridae	Unassigned	51_0	Clustered	2	VC_51_0	2	0.2115	0.950745	0.2011	1	2	2	1
Pseudomonas~phage~phi3	RefSeq-85	Unassigned	Unassigned	Unassigned	70_0	Clustered	7	VC_70_0	7	0.5714	1	0.5714	2	2	2	1
Pseudomonas~phage~phi6	RefSeq-85	Unassigned	Cystoviridae	Cystovirus	279_0	Clustered	2	VC_279_0	2	0.6334	0.5	0.3167	1	1	1	1
Pseudomonas~phage~phi8	RefSeq-85	Unassigned	Cystoviridae	Cystovirus		Singleton
Pseudomonas~phage~PhiCHU	RefSeq-85	Caudovirales	Podoviridae	Luz24virus	193_0	Clustered	9	VC_193_0	9	0.8322	1	0.8322	2	1	1	1
Pseudomonas~phage~phiCTX	RefSeq-85	Caudovirales	Myoviridae	P2virus	69_0	Clustered	29	VC_69_0	29	0.804	1	0.804	2	1	1	1
Pseudomonas~phage~phiIBB-PAA2	RefSeq-85	Caudovirales	Podoviridae	Luz24virus	193_0	Clustered	9	VC_193_0	9	0.8322	1	0.8322	2	1	1	1
Pseudomonas~phage~phiIBB-PF7A	RefSeq-85	Caudovirales	Podoviridae	Unassigned	34_0	Clustered	57	VC_34_0	57	0.8041	1	0.8041	3	2	2	1
Pseudomonas~phage~phikF77	RefSeq-85	Caudovirales	Podoviridae	Unassigned	31_0	Clustered	11	VC_31_0	11	0.4604	1	0.4604	2	1	1	1
Pseudomonas~phage~phiKMV	RefSeq-85	Caudovirales	Podoviridae	Phikmvvirus	31_0	Clustered	11	VC_31_0	11	0.4604	1	0.4604	2	1	1	1
Pseudomonas~phage~phiKZ	RefSeq-85	Caudovirales	Myoviridae	Phikzvirus		Overlap (VC_98/VC_207)
Pseudomonas~phage~phiMK	RefSeq-85	Unassigned	Unassigned	Unassigned	55_0	Clustered	12	VC_55_0	12	0.644	1	0.644	2	2	2	1
Pseudomonas~phage~PhiPA3	RefSeq-85	Caudovirales	Myoviridae	Unassigned		Overlap (VC_98/VC_207)
Pseudomonas~phage~phiPSA1	RefSeq-85	Caudovirales	Siphoviridae	Unassigned		Outlier
Pseudomonas~phage~phiPSA2	RefSeq-85	Caudovirales	Podoviridae	Unassigned	34_0	Clustered	57	VC_34_0	57	0.8041	1	0.8041	3	2	2	1
Pseudomonas~phage~phiPsa374	RefSeq-85	Caudovirales	Myoviridae	Unassigned	47_0	Clustered	2	VC_47_0	2	0.0654	0.95539	0.0625	1	1	1	1
Pseudomonas~phage~phiPto-bp6g	RefSeq-85	Unassigned	Unassigned	Unassigned		Outlier
Pseudomonas~phage~Phi-S1	RefSeq-85	Caudovirales	Podoviridae	Unassigned	34_0	Clustered	57	VC_34_0	57	0.8041	1	0.8041	3	2	2	1
Pseudomonas~phage~PP7	RefSeq-85	Unassigned	Leviviridae	Unassigned		Outlier
Pseudomonas~phage~PPPL-1	RefSeq-85	Caudovirales	Podoviridae	Unassigned	34_0	Clustered	57	VC_34_0	57	0.8041	1	0.8041	3	2	2	1
Pseudomonas~phage~PPpW-3	RefSeq-85	Caudovirales	Myoviridae	Unassigned	89_0	Clustered	4	VC_89_0	4	0.2533	0.999984	0.2533	2	2	2	1
Pseudomonas~phage~PPpW-4	RefSeq-85	Caudovirales	Podoviridae	Unassigned	34_0	Clustered	57	VC_34_0	57	0.8041	1	0.8041	3	2	2	1
Pseudomonas~phage~PRR1	RefSeq-85	Unassigned	Leviviridae	Unassigned	215_0	Clustered	4	VC_215_0	4	0.7023	0.999976	0.7023	1	1	1	1
Pseudomonas~phage~PS-1	RefSeq-85	Caudovirales	Siphoviridae	Unassigned		Outlier
Pseudomonas~phage~PT2	RefSeq-85	Caudovirales	Podoviridae	Unassigned	31_0	Clustered	11	VC_31_0	11	0.4604	1	0.4604	2	1	1	1
Pseudomonas~phage~SN	RefSeq-85	Caudovirales	Myoviridae	Pbunavirus	76_0	Clustered	13	VC_76_0	13	0.8701	1	0.8701	2	1	1	1
Pseudomonas~phage~tf	RefSeq-85	Caudovirales	Podoviridae	Unassigned		Outlier
Pseudomonas~phage~TL	RefSeq-85	Caudovirales	Podoviridae	Luz24virus	193_0	Clustered	9	VC_193_0	9	0.8322	1	0.8322	2	1	1	1
Pseudomonas~phage~UFV-P2	RefSeq-85	Caudovirales	Podoviridae	Unassigned	193_0	Clustered	9	VC_193_0	9	0.8322	1	0.8322	2	1	1	1
Pseudomonas~phage~vB_Pae_PS44	RefSeq-85	Caudovirales	Myoviridae	Unassigned	76_0	Clustered	13	VC_76_0	13	0.8701	1	0.8701	2	1	1	1
Pseudomonas~phage~vB_Pae-Kakheti25	RefSeq-85	Caudovirales	Siphoviridae	Septima3virus	1_0	Clustered	6	VC_1_0	6	0.4766	1	0.4766	2	1	1	1
Pseudomonas~phage~vB_PaeM_C2-10_Ab1	RefSeq-85	Caudovirales	Myoviridae	Pakpunavirus	55_0	Clustered	12	VC_55_0	12	0.644	1	0.644	2	2	2	1
Pseudomonas~phage~vB_PaeM_MAG1	RefSeq-85	Unassigned	Unassigned	Unassigned	55_0	Clustered	12	VC_55_0	12	0.644	1	0.644	2	2	2	1
Pseudomonas~phage~vB_PaeM_PAO1_Ab03	RefSeq-85	Caudovirales	Myoviridae	Kpp10virus		Overlap (VC_56/VC_57)
Pseudomonas~phage~vB_PaeM_PAO1_Ab27	RefSeq-85	Caudovirales	Myoviridae	Unassigned	76_0	Clustered	13	VC_76_0	13	0.8701	1	0.8701	2	1	1	1
Pseudomonas~phage~vB_PaeM_PS24	RefSeq-85	Caudovirales	Myoviridae	Unassigned		Overlap (VC_56/VC_57)
Pseudomonas~phage~vB_PaeP_C2-10_Ab09	RefSeq-85	Caudovirales	Podoviridae	Lit1virus	10_0	Clustered	8	VC_10_0	8	0.4732	1	0.4732	2	2	2	1
Pseudomonas~phage~vB_PaeP_C2-10_Ab22	RefSeq-85	Caudovirales	Podoviridae	Luz24virus	193_0	Clustered	9	VC_193_0	9	0.8322	1	0.8322	2	1	1	1
Pseudomonas~phage~vB_PaeP_MAG4	RefSeq-85	Unassigned	Unassigned	Unassigned	10_0	Clustered	8	VC_10_0	8	0.4732	1	0.4732	2	2	2	1
Pseudomonas~phage~vB_PaeP_p2-10_Or1	RefSeq-85	Caudovirales	Podoviridae	Unassigned	193_0	Clustered	9	VC_193_0	9	0.8322	1	0.8322	2	1	1	1
Pseudomonas~phage~vB_PaeP_PAO1_Ab05	RefSeq-85	Caudovirales	Podoviridae	Unassigned	31_0	Clustered	11	VC_31_0	11	0.4604	1	0.4604	2	1	1	1
Pseudomonas~phage~vB_PaeP_PPA-ABTNL	RefSeq-85	Caudovirales	Podoviridae	Unassigned	31_0	Clustered	11	VC_31_0	11	0.4604	1	0.4604	2	1	1	1
Pseudomonas~phage~vB_PaeP_Tr60_Ab31	RefSeq-85	Unassigned	Unassigned	Unassigned		Outlier
Pseudomonas~phage~vB_PaeS_PAO1_Ab18	RefSeq-85	Caudovirales	Siphoviridae	Ab18virus	2_0	Clustered	2	VC_2_0	2	0.1818	0.954229	0.1735	1	1	1	1
Pseudomonas~phage~vB_PaeS_PAO1_Ab30	RefSeq-85	Caudovirales	Siphoviridae	Unassigned	168_0	Clustered	18	VC_168_0	18	0.7972	1	0.7972	2	2	2	1
Pseudomonas~phage~vB_PaeS_PM105	RefSeq-85	Caudovirales	Siphoviridae	Unassigned	169_0	Clustered	4	VC_169_0	4	0.2163	0.999983	0.2163	1	2	2	1
Pseudomonas~phage~vB_PaeS_SCH_Ab26	RefSeq-85	Caudovirales	Siphoviridae	Septima3virus	1_0	Clustered	6	VC_1_0	6	0.4766	1	0.4766	2	1	1	1
Pseudomonas~phage~vB_Pae-TbilisiM32	RefSeq-85	Caudovirales	Podoviridae	Unassigned	31_0	Clustered	11	VC_31_0	11	0.4604	1	0.4604	2	1	1	1
Pseudomonas~phage~VCM	RefSeq-85	Caudovirales	Myoviridae	Unassigned	47_0	Clustered	2	VC_47_0	2	0.0654	0.95539	0.0625	1	1	1	1
Pseudomonas~phage~YH30	RefSeq-85	Caudovirales	Podoviridae	Unassigned	10_0	Clustered	8	VC_10_0	8	0.4732	1	0.4732	2	2	2	1
Pseudomonas~phage~YH6	RefSeq-85	Caudovirales	Podoviridae	Unassigned	10_0	Clustered	8	VC_10_0	8	0.4732	1	0.4732	2	2	2	1
Pseudomonas~phage~YMC11/02/R656	RefSeq-85	Caudovirales	Siphoviridae	Unassigned		Outlier
Pseudomonas~phage~YMC11/06/C171_PPU_BP	RefSeq-85	Unassigned	Unassigned	Unassigned		Outlier
Pseudomonas~phage~YMC11/07/P54_PAE_BP	RefSeq-85	Unassigned	Unassigned	Unassigned	51_0	Clustered	2	VC_51_0	2	0.2115	0.950745	0.2011	1	2	2	1
Pseudomonas~phage~YuA	RefSeq-85	Caudovirales	Siphoviridae	Yuavirus	2_1	Clustered	4	VC_2_1	4	0.4473	0.999984	0.4473	1	1	1	1
Pseudomonas~virus~D3	RefSeq-85	Caudovirales	Siphoviridae	D3virus	51_2	Clustered	2	VC_51_2	2	0.2218	0.952896	0.2114	1	1	1	1
Pseudomonas~virus~D3112	RefSeq-85	Caudovirales	Siphoviridae	D3112virus	168_0	Clustered	18	VC_168_0	18	0.7972	1	0.7972	2	2	2	1
Pseudomonas~virus~DMS3	RefSeq-85	Caudovirales	Siphoviridae	D3112virus	168_0	Clustered	18	VC_168_0	18	0.7972	1	0.7972	2	2	2	1
Pseudomonas~virus~F116	RefSeq-85	Caudovirales	Podoviridae	F116virus		Outlier
Pseudomonas~virus~LPB1	RefSeq-85	Caudovirales	Siphoviridae	D3112virus	168_0	Clustered	18	VC_168_0	18	0.7972	1	0.7972	2	2	2	1
Pseudomonas~virus~MP29	RefSeq-85	Caudovirales	Siphoviridae	D3112virus	168_0	Clustered	18	VC_168_0	18	0.7972	1	0.7972	2	2	2	1
Pseudomonas~virus~MP38	RefSeq-85	Caudovirales	Siphoviridae	D3112virus	168_0	Clustered	18	VC_168_0	18	0.7972	1	0.7972	2	2	2	1
Pseudomonas~virus~PA1KOR	RefSeq-85	Caudovirales	Siphoviridae	D3112virus	168_0	Clustered	18	VC_168_0	18	0.7972	1	0.7972	2	2	2	1
Pseudomonas~virus~PMG1	RefSeq-85	Caudovirales	Siphoviridae	D3virus	51_2	Clustered	2	VC_51_2	2	0.2218	0.952896	0.2114	1	1	1	1
Psychrobacter~phage~pOW20-A	RefSeq-85	Caudovirales	Myoviridae	Unassigned		Outlier
Psychrobacter~phage~Psymv2	RefSeq-85	Caudovirales	Siphoviridae	Unassigned		Outlier
Puniceispirillum~phage~HMO-2011	RefSeq-85	Caudovirales	Podoviridae	Unassigned	182_0	Clustered	2	VC_182_0	2	0.4437	0.814453	0.3614	1	1	1	1
Pyrobaculum~filamentous~virus~1	RefSeq-85	Unassigned	Tristromaviridae	Alphatristromavirus		Singleton
Pyrobaculum~spherical~virus	RefSeq-85	Unassigned	Globuloviridae	Globulovirus	281_0	Clustered	2	VC_281_0	2	1	1	1	1	1	1	1
Pyrococcus~abyssi~virus~1	RefSeq-85	Unassigned	Unassigned	Unassigned		Singleton
Ralstonia~phage~1~NP-2014	RefSeq-85	Unassigned	Inoviridae	Unassigned		Outlier
Ralstonia~phage~p12J	RefSeq-85	Unassigned	Inoviridae	Unassigned	283_0	Clustered	2	VC_283_0	2	0.5274	0.855578	0.4512	1	1	1	1
Ralstonia~phage~PE226	RefSeq-85	Unassigned	Inoviridae	Unassigned	283_0	Clustered	2	VC_283_0	2	0.5274	0.855578	0.4512	1	1	1	1
Ralstonia~phage~phiRSL1	RefSeq-85	Caudovirales	Myoviridae	Rslunavirus		Outlier
Ralstonia~phage~RS138	RefSeq-85	Unassigned	Unassigned	Unassigned		Outlier
Ralstonia~phage~RS603	RefSeq-85	Unassigned	Inoviridae	Habenivirus	282_0	Clustered	3	VC_282_0	3	0.8592	0.981556	0.8434	1	1	1	1
Ralstonia~phage~RSA1	RefSeq-85	Caudovirales	Myoviridae	P2virus	69_0	Clustered	29	VC_69_0	29	0.804	1	0.804	2	1	1	1
Ralstonia~phage~RSB1	RefSeq-85	Caudovirales	Podoviridae	Unassigned	28_0	Clustered	10	VC_28_0	10	0.2287	1	0.2287	2	2	2	1
Ralstonia~phage~RSB2	RefSeq-85	Caudovirales	Podoviridae	Unassigned		Outlier
Ralstonia~phage~RSB3	RefSeq-85	Caudovirales	Podoviridae	Unassigned		Outlier
Ralstonia~phage~RSF1	RefSeq-85	Caudovirales	Myoviridae	Rsl2virus	97_0	Clustered	2	VC_97_0	2	0.145	0.949416	0.1377	1	1	1	1
Ralstonia~phage~RSJ2	RefSeq-85	Caudovirales	Podoviridae	Unassigned	28_0	Clustered	10	VC_28_0	10	0.2287	1	0.2287	2	2	2	1
Ralstonia~phage~RSJ5	RefSeq-85	Caudovirales	Podoviridae	Unassigned	28_0	Clustered	10	VC_28_0	10	0.2287	1	0.2287	2	2	2	1
Ralstonia~phage~RSK1	RefSeq-85	Caudovirales	Podoviridae	Unassigned		Outlier
Ralstonia~phage~RSL2	RefSeq-85	Caudovirales	Myoviridae	Rsl2virus	97_0	Clustered	2	VC_97_0	2	0.145	0.949416	0.1377	1	1	1	1
Ralstonia~phage~RSM1	RefSeq-85	Unassigned	Inoviridae	Habenivirus	282_0	Clustered	3	VC_282_0	3	0.8592	0.981556	0.8434	1	1	1	1
Ralstonia~phage~RSM3	RefSeq-85	Unassigned	Inoviridae	Habenivirus	282_0	Clustered	3	VC_282_0	3	0.8592	0.981556	0.8434	1	1	1	1
Ralstonia~phage~RSP15	RefSeq-85	Unassigned	Unassigned	Unassigned		Outlier
Ralstonia~phage~RSS0	RefSeq-85	Unassigned	Inoviridae	Unassigned	284_0	Clustered	3	VC_284_0	3	0.899	0.925543	0.832	1	1	1	1
Ralstonia~phage~RSS1	RefSeq-85	Unassigned	Inoviridae	Unassigned	284_0	Clustered	3	VC_284_0	3	0.899	0.925543	0.832	1	1	1	1
Ralstonia~phage~RSS20	RefSeq-85	Unassigned	Inoviridae	Unassigned	284_0	Clustered	3	VC_284_0	3	0.899	0.925543	0.832	1	1	1	1
Ralstonia~phage~RSS30	RefSeq-85	Unassigned	Inoviridae	Unassigned		Outlier
Ralstonia~phage~RSY1	RefSeq-85	Caudovirales	Myoviridae	Unassigned	69_0	Clustered	29	VC_69_0	29	0.804	1	0.804	2	1	1	1
Rhizobium~phage~16-3	RefSeq-85	Caudovirales	Siphoviridae	Unassigned	162_0	Clustered	2	VC_162_0	2	0.2412	0.937223	0.226	1	2	2	1
Rhizobium~phage~RHEph06	RefSeq-85	Caudovirales	Myoviridae	Unassigned		Outlier
Rhizobium~phage~RHEph10	RefSeq-85	Unassigned	Unassigned	Unassigned	13_0	Clustered	3	VC_13_0	3	0.4461	0.998159	0.4453	1	2	2	1
Rhizobium~phage~RR1-A	RefSeq-85	Caudovirales	Myoviridae	Unassigned	88_0	Clustered	3	VC_88_0	3	0.5427	0.993593	0.5393	1	2	2	1
Rhizobium~phage~RR1-B	RefSeq-85	Caudovirales	Myoviridae	Unassigned		Outlier
Rhizobium~phage~vB_RglS_P106B	RefSeq-85	Caudovirales	Siphoviridae	Unassigned		Outlier
Rhizobium~phage~vB_RleM_P10VF	RefSeq-85	Caudovirales	Myoviridae	Unassigned	42_0	Clustered	2	VC_42_0	2	0.0328	0.957576	0.0314	1	1	1	1
Rhizobium~phage~vB_RleM_PPF1	RefSeq-85	Caudovirales	Myoviridae	Unassigned	88_0	Clustered	3	VC_88_0	3	0.5427	0.993593	0.5393	1	2	2	1
Rhizobium~phage~vB_RleS_L338C	RefSeq-85	Caudovirales	Siphoviridae	Unassigned	175_0	Clustered	2	VC_175_0	2	0.3042	0.927669	0.2822	1	1	1	1
Rhodobacter~phage~RC1	RefSeq-85	Caudovirales	Siphoviridae	Unassigned	177_0	Clustered	2	VC_177_0	2	0.2628	0.953459	0.2505	1	2	2	1
Rhodobacter~phage~RcapMu	RefSeq-85	Caudovirales	Siphoviridae	Unassigned		Outlier
Rhodobacter~phage~RcapNL	RefSeq-85	Unassigned	Unassigned	Unassigned		Overlap (VC_147/VC_163)
Rhodobacter~phage~RcRhea	RefSeq-85	Caudovirales	Siphoviridae	Cronusvirus	213_0	Clustered	2	VC_213_0	2	0.1567	0.904785	0.1418	2	2	2	1
Rhodobacter~phage~RcTitan	RefSeq-85	Caudovirales	Siphoviridae	Titanvirus		Outlier
Rhodococcus~phage~CosmicSans	RefSeq-85	Caudovirales	Siphoviridae	Unassigned	253_0	Clustered	3	VC_253_0	3	0.0247	0.998571	0.0246	2	1	1	1
Rhodococcus~phage~E3	RefSeq-85	Caudovirales	Myoviridae	Unassigned		Outlier
Rhodococcus~phage~REQ1	RefSeq-85	Caudovirales	Siphoviridae	Unassigned		Singleton
Rhodococcus~phage~REQ2	RefSeq-85	Unassigned	Unassigned	Unassigned		Outlier
Rhodococcus~phage~REQ3	RefSeq-85	Unassigned	Unassigned	Unassigned	237_0	Clustered	2	VC_237_0	2	0.0716	0.95532	0.0684	1	1	1	1
Rhodococcus~phage~ReqiDocB7	RefSeq-85	Caudovirales	Siphoviridae	Unassigned		Outlier
Rhodococcus~phage~ReqiPepy6	RefSeq-85	Caudovirales	Siphoviridae	Pepy6virus	84_0	Clustered	2	VC_84_0	2	0.4791	0.933069	0.4471	1	1	1	1
Rhodococcus~phage~ReqiPine5	RefSeq-85	Caudovirales	Siphoviridae	Unassigned		Outlier
Rhodococcus~phage~ReqiPoco6	RefSeq-85	Caudovirales	Siphoviridae	Pepy6virus	84_0	Clustered	2	VC_84_0	2	0.4791	0.933069	0.4471	1	1	1	1
Rhodococcus~phage~RER2	RefSeq-85	Caudovirales	Siphoviridae	Rer2virus	253_0	Clustered	3	VC_253_0	3	0.0247	0.998571	0.0246	2	1	1	1
Rhodococcus~phage~RGL3	RefSeq-85	Caudovirales	Siphoviridae	Rer2virus	253_0	Clustered	3	VC_253_0	3	0.0247	0.998571	0.0246	2	1	1	1
Rhodococcus~phage~RRH1	RefSeq-85	Caudovirales	Siphoviridae	Unassigned	81_0	Clustered	4	VC_81_0	4	0.8151	0.992893	0.8093	1	2	2	1
Rhodoferax~phage~P26218	RefSeq-85	Caudovirales	Podoviridae	Unassigned		Outlier
Rhodothermus~phage~RM378	RefSeq-85	Caudovirales	Myoviridae	Unassigned		Outlier
Rhodovulum~phage~RS1	RefSeq-85	Unassigned	Unassigned	Unassigned	177_0	Clustered	2	VC_177_0	2	0.2628	0.953459	0.2505	1	2	2	1
Rhodovulum~phage~vB_RhkS_P1	RefSeq-85	Unassigned	Unassigned	Unassigned		Outlier
Riemerella~phage~RAP44	RefSeq-85	Caudovirales	Siphoviridae	Unassigned		Singleton
Roseobacter~phage~RDJL~Phi~1	RefSeq-85	Caudovirales	Siphoviridae	Rdjlvirus		Outlier
Roseobacter~phage~SIO1	RefSeq-85	Caudovirales	Podoviridae	Unassigned	181_0	Clustered	2	VC_181_0	2	0.3141	0.942513	0.296	1	2	1	1
Ruegeria~phage~DSS3-P1	RefSeq-85	Caudovirales	Siphoviridae	Unassigned		Outlier
Salicola~phage~CGphi29	RefSeq-85	Unassigned	Unassigned	Unassigned		Outlier
Salinivibrio~phage~CW02	RefSeq-85	Caudovirales	Podoviridae	Unassigned	180_0	Clustered	4	VC_180_0	4	0.4979	0.999973	0.4979	1	2	2	1
Salisaeta~icosahedral~phage~1	RefSeq-85	Unassigned	Unassigned	Unassigned		Singleton
Salmonella~enterica~bacteriophage~SE1	RefSeq-85	Caudovirales	Podoviridae	Unassigned		Overlap (VC_13/VC_151)
Salmonella~phage~100268_sal2	RefSeq-85	Caudovirales	Siphoviridae	T5virus	207_0	Clustered	14	VC_207_0	14	0.8522	1	0.8522	2	2	2	1
Salmonella~phage~103203_sal5	RefSeq-85	Unassigned	Unassigned	Unassigned		Overlap (VC_13/VC_151)
Salmonella~phage~118970_sal1	RefSeq-85	Unassigned	Unassigned	Unassigned	15_0	Clustered	9	VC_15_0	9	0.6303	1	0.6303	2	2	2	1
Salmonella~phage~118970_sal2	RefSeq-85	Unassigned	Unassigned	Unassigned	207_0	Clustered	14	VC_207_0	14	0.8522	1	0.8522	2	2	2	1
Salmonella~phage~118970_sal3	RefSeq-85	Unassigned	Unassigned	Unassigned		Overlap (VC_73/VC_94)
Salmonella~phage~118970_sal4	RefSeq-85	Unassigned	Unassigned	Unassigned		Overlap (VC_13/VC_151)
Salmonella~phage~19	RefSeq-85	Caudovirales	Myoviridae	Unassigned		Outlier
Salmonella~phage~21	RefSeq-85	Caudovirales	Myoviridae	Unassigned		Outlier
Salmonella~phage~36	RefSeq-85	Caudovirales	Siphoviridae	Unassigned	170_0	Clustered	25	VC_170_0	25	0.8432	1	0.8432	6	2	2	0.9733
Salmonella~phage~37	RefSeq-85	Caudovirales	Siphoviridae	Unassigned	15_0	Clustered	9	VC_15_0	9	0.6303	1	0.6303	2	2	2	1
Salmonella~phage~38	RefSeq-85	Caudovirales	Ackermannviridae	Cba120virus	41_1	Clustered	19	VC_41_1	19	0.4193	1	0.4193	5	1	1	0.8655
Salmonella~phage~64795_sal3	RefSeq-85	Unassigned	Unassigned	Unassigned	195_0	Clustered	4	VC_195_0	4	0.3991	0.999983	0.3991	1	2	2	1
Salmonella~phage~7-11	RefSeq-85	Caudovirales	Podoviridae	Unassigned	194_0	Clustered	2	VC_194_0	2	0.1684	0.954881	0.1608	1	1	1	1
Salmonella~phage~9NA	RefSeq-85	Caudovirales	Podoviridae	Nonanavirus		Outlier
Salmonella~phage~BP12A	RefSeq-85	Unassigned	Unassigned	Unassigned	34_0	Clustered	57	VC_34_0	57	0.8041	1	0.8041	3	2	2	1
Salmonella~phage~BP12B	RefSeq-85	Unassigned	Unassigned	Unassigned	30_0	Clustered	15	VC_30_0	15	0.4346	1	0.4346	2	2	2	1
Salmonella~phage~BP12C	RefSeq-85	Unassigned	Unassigned	Unassigned	15_0	Clustered	9	VC_15_0	9	0.6303	1	0.6303	2	2	2	1
Salmonella~phage~BP63	RefSeq-85	Unassigned	Unassigned	Unassigned		Outlier
Salmonella~phage~BPS11Q3	RefSeq-85	Unassigned	Unassigned	Unassigned	49_0	Clustered	17	VC_49_0	17	0.7676	1	0.7676	4	3	2	1
Salmonella~phage~BPS15Q2	RefSeq-85	Unassigned	Unassigned	Unassigned	16_0	Clustered	16	VC_16_0	16	0.8255	1	0.8255	4	2	2	1
Salmonella~phage~Det7	RefSeq-85	Caudovirales	Ackermannviridae	Cba120virus	41_1	Clustered	19	VC_41_1	19	0.4193	1	0.4193	5	1	1	0.8655
Salmonella~phage~Ent1	RefSeq-85	Caudovirales	Siphoviridae	Jerseyvirus	49_0	Clustered	17	VC_49_0	17	0.7676	1	0.7676	4	3	2	1
Salmonella~phage~epsilon34	RefSeq-85	Caudovirales	Podoviridae	Unassigned		Overlap (VC_13/VC_151)
Salmonella~phage~f18SE	RefSeq-85	Caudovirales	Siphoviridae	Jerseyvirus	49_0	Clustered	17	VC_49_0	17	0.7676	1	0.7676	4	3	2	1
Salmonella~phage~FelixO1	RefSeq-85	Caudovirales	Myoviridae	Felixo1virus	16_0	Clustered	16	VC_16_0	16	0.8255	1	0.8255	4	2	2	1
Salmonella~phage~Fels-1	RefSeq-85	Unassigned	Unassigned	Unassigned		Overlap (VC_75/VC_173)
Salmonella~phage~Fels-2	RefSeq-85	Caudovirales	Myoviridae	P2virus	69_0	Clustered	29	VC_69_0	29	0.804	1	0.804	2	1	1	1
Salmonella~phage~FSL~SP-004	RefSeq-85	Caudovirales	Myoviridae	Unassigned	69_0	Clustered	29	VC_69_0	29	0.804	1	0.804	2	1	1	1
Salmonella~phage~FSL~SP-031	RefSeq-85	Caudovirales	Siphoviridae	Sp31virus	49_0	Clustered	17	VC_49_0	17	0.7676	1	0.7676	4	3	2	1
Salmonella~phage~FSL~SP-058	RefSeq-85	Caudovirales	Podoviridae	Sp58virus		Outlier
Salmonella~phage~FSL~SP-076	RefSeq-85	Caudovirales	Podoviridae	Sp58virus		Outlier
Salmonella~phage~GG32	RefSeq-85	Caudovirales	Ackermannviridae	Cba120virus	41_1	Clustered	19	VC_41_1	19	0.4193	1	0.4193	5	1	1	0.8655
Salmonella~phage~IME207	RefSeq-85	Unassigned	Unassigned	Unassigned	195_0	Clustered	4	VC_195_0	4	0.3991	0.999983	0.3991	1	2	2	1
Salmonella~phage~Jersey	RefSeq-85	Caudovirales	Siphoviridae	Jerseyvirus	49_0	Clustered	17	VC_49_0	17	0.7676	1	0.7676	4	3	2	1
Salmonella~phage~L13	RefSeq-85	Caudovirales	Siphoviridae	Jerseyvirus		Outlier
Salmonella~phage~LSPA1	RefSeq-85	Caudovirales	Siphoviridae	Jerseyvirus	49_0	Clustered	17	VC_49_0	17	0.7676	1	0.7676	4	3	2	1
Salmonella~phage~MA12	RefSeq-85	Unassigned	Unassigned	Unassigned	49_0	Clustered	17	VC_49_0	17	0.7676	1	0.7676	4	3	2	1
Salmonella~phage~Marshall	RefSeq-85	Caudovirales	Ackermannviridae	Vi1virus	41_1	Clustered	19	VC_41_1	19	0.4193	1	0.4193	5	1	1	0.8655
Salmonella~phage~Maynard	RefSeq-85	Caudovirales	Ackermannviridae	Vi1virus	41_1	Clustered	19	VC_41_1	19	0.4193	1	0.4193	5	1	1	0.8655
Salmonella~phage~NR01	RefSeq-85	Unassigned	Unassigned	Unassigned	207_0	Clustered	14	VC_207_0	14	0.8522	1	0.8522	2	2	2	1
Salmonella~phage~phiSG-JL2	RefSeq-85	Caudovirales	Podoviridae	Unassigned	34_0	Clustered	57	VC_34_0	57	0.8041	1	0.8041	3	2	2	1
Salmonella~phage~phSE-2	RefSeq-85	Unassigned	Unassigned	Unassigned	170_0	Clustered	25	VC_170_0	25	0.8432	1	0.8432	6	2	2	0.9733
Salmonella~phage~PVP-SE1	RefSeq-85	Caudovirales	Myoviridae	Se1virus	57_0	Clustered	2	VC_57_0	2	0.0504	0.950018	0.0479	1	1	1	1
Salmonella~phage~RE-2010	RefSeq-85	Caudovirales	Myoviridae	Unassigned	69_0	Clustered	29	VC_69_0	29	0.804	1	0.804	2	1	1	1
Salmonella~phage~SE2	RefSeq-85	Caudovirales	Siphoviridae	Jerseyvirus	49_0	Clustered	17	VC_49_0	17	0.7676	1	0.7676	4	3	2	1
Salmonella~phage~SEN1	RefSeq-85	Caudovirales	Myoviridae	Unassigned	69_0	Clustered	29	VC_69_0	29	0.804	1	0.804	2	1	1	1
Salmonella~phage~SEN22	RefSeq-85	Caudovirales	Podoviridae	Unassigned		Overlap (VC_13/VC_151)
Salmonella~phage~SEN34	RefSeq-85	Caudovirales	Podoviridae	Unassigned		Outlier
Salmonella~phage~SEN4	RefSeq-85	Caudovirales	Myoviridae	Unassigned	69_0	Clustered	29	VC_69_0	29	0.804	1	0.804	2	1	1	1
Salmonella~phage~SEN5	RefSeq-85	Caudovirales	Myoviridae	Unassigned	69_0	Clustered	29	VC_69_0	29	0.804	1	0.804	2	1	1	1
Salmonella~phage~SETP13	RefSeq-85	Caudovirales	Siphoviridae	Jerseyvirus	49_0	Clustered	17	VC_49_0	17	0.7676	1	0.7676	4	3	2	1
Salmonella~phage~SETP3	RefSeq-85	Caudovirales	Siphoviridae	Jerseyvirus	49_0	Clustered	17	VC_49_0	17	0.7676	1	0.7676	4	3	2	1
Salmonella~phage~SETP7	RefSeq-85	Caudovirales	Siphoviridae	Jerseyvirus	49_0	Clustered	17	VC_49_0	17	0.7676	1	0.7676	4	3	2	1
Salmonella~phage~SFP10	RefSeq-85	Caudovirales	Ackermannviridae	Cba120virus	41_1	Clustered	19	VC_41_1	19	0.4193	1	0.4193	5	1	1	0.8655
Salmonella~phage~Sh19	RefSeq-85	Caudovirales	Ackermannviridae	Cba120virus	41_1	Clustered	19	VC_41_1	19	0.4193	1	0.4193	5	1	1	0.8655
Salmonella~phage~Shivani	RefSeq-85	Caudovirales	Siphoviridae	T5virus	207_0	Clustered	14	VC_207_0	14	0.8522	1	0.8522	2	2	2	1
Salmonella~phage~SJ46	RefSeq-85	Unassigned	Unassigned	Unassigned	222_0	Clustered	2	VC_222_0	2	1	1	1	2	2	2	1
Salmonella~phage~SKML-39	RefSeq-85	Caudovirales	Ackermannviridae	Ag3virus	41_1	Clustered	19	VC_41_1	19	0.4193	1	0.4193	5	1	1	0.8655
Salmonella~phage~SPN1S	RefSeq-85	Caudovirales	Podoviridae	Epsilon15virus	148_0	Clustered	5	VC_148_0	5	0.6227	1	0.6227	2	2	2	1
Salmonella~phage~SPN3UB	RefSeq-85	Caudovirales	Siphoviridae	Unassigned		Outlier
Salmonella~phage~SPN3US	RefSeq-85	Caudovirales	Myoviridae	Ntreusvirus	205_1	Clustered	3	VC_205_1	3	0.1129	0.986585	0.1114	2	1	1	1
Salmonella~phage~SPN9CC	RefSeq-85	Caudovirales	Podoviridae	Unassigned		Overlap (VC_13/VC_151)
Salmonella~phage~SS3e	RefSeq-85	Caudovirales	Siphoviridae	Jerseyvirus	49_0	Clustered	17	VC_49_0	17	0.7676	1	0.7676	4	3	2	1
Salmonella~phage~SSE121	RefSeq-85	Caudovirales	Myoviridae	Se1virus	57_0	Clustered	2	VC_57_0	2	0.0504	0.950018	0.0479	1	1	1	1
Salmonella~phage~SSU5	RefSeq-85	Caudovirales	Siphoviridae	Unassigned	13_0	Clustered	3	VC_13_0	3	0.4461	0.998159	0.4453	1	2	2	1
Salmonella~phage~ST160	RefSeq-85	Caudovirales	Podoviridae	Unassigned		Overlap (VC_13/VC_151)
Salmonella~phage~ST64B	RefSeq-85	Caudovirales	Unassigned	Unassigned		Overlap (VC_73/VC_94)
Salmonella~phage~ST64T	RefSeq-85	Caudovirales	Podoviridae	P22virus		Overlap (VC_13/VC_151)
Salmonella~phage~STML-198	RefSeq-85	Caudovirales	Myoviridae	S16virus	35_3	Clustered	4	VC_35_3	4	0.0176	0.999713	0.0176	2	2	2	1
Salmonella~phage~STP4-a	RefSeq-85	Caudovirales	Myoviridae	Unassigned	35_3	Clustered	4	VC_35_3	4	0.0176	0.999713	0.0176	2	2	2	1
Salmonella~phage~vB_SalM_PM10	RefSeq-85	Caudovirales	Ackermannviridae	Cba120virus	41_1	Clustered	19	VC_41_1	19	0.4193	1	0.4193	5	1	1	0.8655
Salmonella~phage~vB_SalM_SJ2	RefSeq-85	Caudovirales	Ackermannviridae	Vi1virus	41_1	Clustered	19	VC_41_1	19	0.4193	1	0.4193	5	1	1	0.8655
Salmonella~phage~vB_SalM_SJ3	RefSeq-85	Caudovirales	Ackermannviridae	Cba120virus	41_1	Clustered	19	VC_41_1	19	0.4193	1	0.4193	5	1	1	0.8655
Salmonella~phage~vB_SemP_Emek	RefSeq-85	Caudovirales	Podoviridae	Unassigned		Overlap (VC_13/VC_151)
Salmonella~phage~vB_SenMS16	RefSeq-85	Caudovirales	Myoviridae	S16virus	35_3	Clustered	4	VC_35_3	4	0.0176	0.999713	0.0176	2	2	2	1
Salmonella~phage~vB_SenS-Ent2	RefSeq-85	Caudovirales	Siphoviridae	Unassigned	49_0	Clustered	17	VC_49_0	17	0.7676	1	0.7676	4	3	2	1
Salmonella~phage~vB_SenS-Ent3	RefSeq-85	Caudovirales	Siphoviridae	Unassigned	49_0	Clustered	17	VC_49_0	17	0.7676	1	0.7676	4	3	2	1
Salmonella~phage~vB_SnwM_CGG4-1	RefSeq-85	Unassigned	Unassigned	Unassigned	35_3	Clustered	4	VC_35_3	4	0.0176	0.999713	0.0176	2	2	2	1
Salmonella~phage~vB_SosS_Oslo	RefSeq-85	Caudovirales	Siphoviridae	Unassigned	12_1	Clustered	2	VC_12_1	2	0.0294	0.956725	0.0282	1	1	1	1
Salmonella~phage~vB_SPuM_SP116	RefSeq-85	Caudovirales	Myoviridae	Felixo1virus	16_0	Clustered	16	VC_16_0	16	0.8255	1	0.8255	4	2	2	1
Salmonella~phage~Vi~II-E1	RefSeq-85	Caudovirales	Siphoviridae	Unassigned	195_0	Clustered	4	VC_195_0	4	0.3991	0.999983	0.3991	1	2	2	1
Salmonella~phage~Vi06	RefSeq-85	Caudovirales	Podoviridae	Unassigned	34_0	Clustered	57	VC_34_0	57	0.8041	1	0.8041	3	2	2	1
Salmonella~phage~ViI	RefSeq-85	Caudovirales	Ackermannviridae	Vi1virus	41_1	Clustered	19	VC_41_1	19	0.4193	1	0.4193	5	1	1	0.8655
Salmonella~virus~Chi	RefSeq-85	Caudovirales	Siphoviridae	Chivirus	15_0	Clustered	9	VC_15_0	9	0.6303	1	0.6303	2	2	2	1
Salmonella~virus~FSLSP030	RefSeq-85	Caudovirales	Siphoviridae	Chivirus	15_0	Clustered	9	VC_15_0	9	0.6303	1	0.6303	2	2	2	1
Salmonella~virus~FSLSP088	RefSeq-85	Caudovirales	Siphoviridae	Chivirus	15_0	Clustered	9	VC_15_0	9	0.6303	1	0.6303	2	2	2	1
Salmonella~virus~HK620	RefSeq-85	Caudovirales	Podoviridae	P22virus		Overlap (VC_13/VC_151)
Salmonella~virus~iEPS5	RefSeq-85	Caudovirales	Siphoviridae	Chivirus	15_0	Clustered	9	VC_15_0	9	0.6303	1	0.6303	2	2	2	1
Salmonella~virus~P22	RefSeq-85	Caudovirales	Podoviridae	P22virus		Overlap (VC_13/VC_151)
Salmonella~virus~PRD1	RefSeq-85	Unassigned	Tectiviridae	Alphatectivirus		Singleton
Salmonella~virus~PsP3	RefSeq-85	Caudovirales	Myoviridae	P2virus	69_0	Clustered	29	VC_69_0	29	0.804	1	0.804	2	1	1	1
Salmonella~virus~SP6	RefSeq-85	Caudovirales	Podoviridae	Sp6virus	30_0	Clustered	15	VC_30_0	15	0.4346	1	0.4346	2	2	2	1
Salmonella~virus~SPC35	RefSeq-85	Caudovirales	Siphoviridae	T5virus	207_0	Clustered	14	VC_207_0	14	0.8522	1	0.8522	2	2	2	1
Salmonella~virus~SPN19	RefSeq-85	Caudovirales	Siphoviridae	Chivirus	15_0	Clustered	9	VC_15_0	9	0.6303	1	0.6303	2	2	2	1
Salmonella~virus~Stitch	RefSeq-85	Caudovirales	Siphoviridae	T5virus	207_0	Clustered	14	VC_207_0	14	0.8522	1	0.8522	2	2	2	1
Serratia~phage~Eta	RefSeq-85	Caudovirales	Siphoviridae	Unassigned		Outlier
Serratia~phage~phiMAM1	RefSeq-85	Caudovirales	Ackermannviridae	Unassigned	41_0	Clustered	2	VC_41_0	2	0.0174	0.957576	0.0166	1	1	1	1
Shewanella~phage~Spp001	RefSeq-85	Caudovirales	Myoviridae	Unassigned	53_0	Clustered	5	VC_53_0	5	0.9799	0.999938	0.9798	1	1	1	1
Shewanella~sp.~phage~1/4	RefSeq-85	Caudovirales	Myoviridae	Unassigned	54_0	Clustered	2	VC_54_0	2	0.2379	0.955554	0.2273	1	1	1	1
Shewanella~sp.~phage~1/40	RefSeq-85	Caudovirales	Myoviridae	Unassigned	54_0	Clustered	2	VC_54_0	2	0.2379	0.955554	0.2273	1	1	1	1
Shewanella~sp.~phage~1/41	RefSeq-85	Caudovirales	Myoviridae	Unassigned		Outlier
Shewanella~sp.~phage~1/44	RefSeq-85	Caudovirales	Myoviridae	Unassigned	214_0	Clustered	2	VC_214_0	2	0.3694	0.879217	0.3248	1	2	1	1
Shewanella~sp.~phage~3/49	RefSeq-85	Caudovirales	Myoviridae	Unassigned		Outlier
Shigella~phage~75/02~Stx	RefSeq-85	Caudovirales	Podoviridae	Pocjvirus	71_1	Clustered	13	VC_71_1	13	0.5146	1	0.5146	4	1	1	0.8846
Shigella~phage~Ag3	RefSeq-85	Caudovirales	Ackermannviridae	Ag3virus	41_1	Clustered	19	VC_41_1	19	0.4193	1	0.4193	5	1	1	0.8655
Shigella~phage~EP23	RefSeq-85	Caudovirales	Siphoviridae	Hk578virus	155_0	Clustered	10	VC_155_0	10	0.52	1	0.52	2	2	2	1
Shigella~phage~POCJ13	RefSeq-85	Caudovirales	Podoviridae	Pocjvirus	71_1	Clustered	13	VC_71_1	13	0.5146	1	0.5146	4	1	1	0.8846
Shigella~phage~pSb-1	RefSeq-85	Caudovirales	Podoviridae	G7cvirus	6_1	Clustered	10	VC_6_1	10	0.3866	1	0.3866	3	1	1	1
Shigella~phage~pSf-1	RefSeq-85	Caudovirales	Siphoviridae	Unassigned	170_0	Clustered	25	VC_170_0	25	0.8432	1	0.8432	6	2	2	0.9733
Shigella~phage~pSf-2	RefSeq-85	Caudovirales	Siphoviridae	T1virus	170_0	Clustered	25	VC_170_0	25	0.8432	1	0.8432	6	2	2	0.9733
Shigella~phage~pSs-1	RefSeq-85	Caudovirales	Myoviridae	T4virus	35_13	Clustered	27	VC_35_13	27	0.1738	1	0.1738	2	2	2	1
Shigella~phage~SfII	RefSeq-85	Caudovirales	Myoviridae	Unassigned		Overlap (VC_73/VC_94)
Shigella~phage~SfIV	RefSeq-85	Caudovirales	Myoviridae	Unassigned		Overlap (VC_73/VC_94)
Shigella~phage~SfMu	RefSeq-85	Caudovirales	Myoviridae	Muvirus	174_0	Clustered	3	VC_174_0	3	0.4448	0.998304	0.4441	2	1	1	1
Shigella~phage~SHBML-50-1	RefSeq-85	Unassigned	Unassigned	Unassigned	35_13	Clustered	27	VC_35_13	27	0.1738	1	0.1738	2	2	2	1
Shigella~phage~Shf125875	RefSeq-85	Caudovirales	Myoviridae	Rb69virus	35_12	Clustered	7	VC_35_12	7	0.0354	1	0.0354	2	2	2	1
Shigella~phage~Shfl2	RefSeq-85	Caudovirales	Myoviridae	T4virus	35_13	Clustered	27	VC_35_13	27	0.1738	1	0.1738	2	2	2	1
Shigella~phage~SHFML-11	RefSeq-85	Unassigned	Unassigned	Unassigned	35_13	Clustered	27	VC_35_13	27	0.1738	1	0.1738	2	2	2	1
Shigella~phage~SHFML-26	RefSeq-85	Unassigned	Unassigned	Unassigned	35_13	Clustered	27	VC_35_13	27	0.1738	1	0.1738	2	2	2	1
Shigella~phage~SHSML-45	RefSeq-85	Unassigned	Unassigned	Unassigned	207_0	Clustered	14	VC_207_0	14	0.8522	1	0.8522	2	2	2	1
Shigella~phage~SHSML-52-1	RefSeq-85	Unassigned	Unassigned	Unassigned	35_12	Clustered	7	VC_35_12	7	0.0354	1	0.0354	2	2	2	1
Shigella~phage~SP18	RefSeq-85	Caudovirales	Myoviridae	Sp18virus	35_10	Clustered	5	VC_35_10	5	0.0236	0.999985	0.0236	1	1	1	1
Shigella~phage~Ss-VASD	RefSeq-85	Caudovirales	Podoviridae	Tl2011virus	71_1	Clustered	13	VC_71_1	13	0.5146	1	0.5146	4	1	1	0.8846
Shigella~virus~Sf6	RefSeq-85	Caudovirales	Podoviridae	P22virus		Overlap (VC_13/VC_151)
Shigella~virus~Shfl1	RefSeq-85	Caudovirales	Siphoviridae	T1virus	170_0	Clustered	25	VC_170_0	25	0.8432	1	0.8432	6	2	2	0.9733
Silicibacter~phage~DSS3phi2	RefSeq-85	Caudovirales	Podoviridae	Unassigned	8_0	Clustered	4	VC_8_0	4	0.1611	0.999982	0.1611	2	1	1	1
Sinorhizobium~phage~PBC5	RefSeq-85	Caudovirales	Unassigned	Unassigned		Outlier
Sinorhizobium~phage~phiLM21	RefSeq-85	Caudovirales	Siphoviridae	Unassigned		Outlier
Sinorhizobium~phage~phiM12	RefSeq-85	Caudovirales	Myoviridae	M12virus	38_0	Clustered	2	VC_38_0	2	0.0275	0.957574	0.0263	1	1	1	1
Sinorhizobium~phage~phiM9	RefSeq-85	Caudovirales	Myoviridae	Unassigned	42_0	Clustered	2	VC_42_0	2	0.0328	0.957576	0.0314	1	1	1	1
Sinorhizobium~phage~phiN3	RefSeq-85	Caudovirales	Myoviridae	M12virus	38_0	Clustered	2	VC_38_0	2	0.0275	0.957574	0.0263	1	1	1	1
Sodalis~phage~phiSG1	RefSeq-85	Unassigned	Unassigned	Unassigned		Outlier
Sodalis~phage~SO1	RefSeq-85	Caudovirales	Siphoviridae	Hk578virus	155_0	Clustered	10	VC_155_0	10	0.52	1	0.52	2	2	2	1
Sphingomonas~phage~PAU	RefSeq-85	Caudovirales	Myoviridae	Unassigned		Outlier
Spiroplasma~phage~1-C74	RefSeq-85	Unassigned	Inoviridae	Vespertiliovirus	285_0	Clustered	3	VC_285_0	3	1	1	1	1	1	1	1
Spiroplasma~phage~1-R8A2B	RefSeq-85	Unassigned	Inoviridae	Vespertiliovirus	285_0	Clustered	3	VC_285_0	3	1	1	1	1	1	1	1
Spiroplasma~phage~4	RefSeq-85	Unassigned	Microviridae	Spiromicrovirus		Outlier
Spiroplasma~phage~SVTS2	RefSeq-85	Unassigned	Inoviridae	Unassigned		Singleton
Spiroplasma~virus~SkV1CR23x	RefSeq-85	Unassigned	Inoviridae	Vespertiliovirus	285_0	Clustered	3	VC_285_0	3	1	1	1	1	1	1	1
Staphylococcus~aureus~phage~P68	RefSeq-85	Caudovirales	Podoviridae	Unassigned	221_0	Clustered	8	VC_221_0	8	0.8498	1	0.8498	2	2	2	1
Staphylococcus~phage~23MRA	RefSeq-85	Caudovirales	Siphoviridae	Unassigned	125_0	Clustered	17	VC_125_0	17	0.284	1	0.284	2	2	2	0.8162
Staphylococcus~phage~2638A	RefSeq-85	Caudovirales	Siphoviridae	Unassigned		Outlier
Staphylococcus~phage~3MRA	RefSeq-85	Caudovirales	Siphoviridae	Unassigned	139_0	Clustered	37	VC_139_0	37	0.5778	1	0.5778	2	1	1	0.9159
Staphylococcus~phage~44AHJD	RefSeq-85	Caudovirales	Podoviridae	P68virus	221_0	Clustered	8	VC_221_0	8	0.8498	1	0.8498	2	2	2	1
Staphylococcus~phage~66	RefSeq-85	Caudovirales	Podoviridae	Unassigned	221_0	Clustered	8	VC_221_0	8	0.8498	1	0.8498	2	2	2	1
Staphylococcus~phage~6ec	RefSeq-85	Caudovirales	Siphoviridae	Sextaecvirus	142_0	Clustered	2	VC_142_0	2	0.3051	0.955302	0.2915	1	1	1	1
Staphylococcus~phage~812	RefSeq-85	Caudovirales	Myoviridae	Unassigned		Overlap (VC_99/VC_104)
Staphylococcus~phage~B166	RefSeq-85	Caudovirales	Siphoviridae	Unassigned	139_0	Clustered	37	VC_139_0	37	0.5778	1	0.5778	2	1	1	0.9159
Staphylococcus~phage~B236	RefSeq-85	Caudovirales	Siphoviridae	Unassigned	139_0	Clustered	37	VC_139_0	37	0.5778	1	0.5778	2	1	1	0.9159
Staphylococcus~phage~BP39	RefSeq-85	Unassigned	Unassigned	Unassigned	221_0	Clustered	8	VC_221_0	8	0.8498	1	0.8498	2	2	2	1
Staphylococcus~phage~CNPx	RefSeq-85	Unassigned	Unassigned	Unassigned		Outlier
Staphylococcus~phage~DW2	RefSeq-85	Caudovirales	Siphoviridae	Unassigned	139_0	Clustered	37	VC_139_0	37	0.5778	1	0.5778	2	1	1	0.9159
Staphylococcus~phage~GH15	RefSeq-85	Caudovirales	Myoviridae	Kayvirus		Overlap (VC_99/VC_104)
Staphylococcus~phage~GRCS	RefSeq-85	Caudovirales	Podoviridae	Unassigned	221_0	Clustered	8	VC_221_0	8	0.8498	1	0.8498	2	2	2	1
Staphylococcus~phage~IME-SA4	RefSeq-85	Caudovirales	Siphoviridae	Unassigned		Outlier
Staphylococcus~phage~JD007	RefSeq-85	Caudovirales	Myoviridae	Kayvirus		Overlap (VC_99/VC_104)
Staphylococcus~phage~JS01	RefSeq-85	Caudovirales	Siphoviridae	Unassigned	125_0	Clustered	17	VC_125_0	17	0.284	1	0.284	2	2	2	0.8162
Staphylococcus~phage~MCE-2014	RefSeq-85	Caudovirales	Myoviridae	Kayvirus		Overlap (VC_99/VC_104)
Staphylococcus~phage~P108	RefSeq-85	Caudovirales	Myoviridae	Kayvirus		Overlap (VC_99/VC_104)
Staphylococcus~phage~P954	RefSeq-85	Caudovirales	Siphoviridae	Unassigned	125_0	Clustered	17	VC_125_0	17	0.284	1	0.284	2	2	2	0.8162
Staphylococcus~phage~phi2958PVL	RefSeq-85	Unassigned	Unassigned	Unassigned	124_0	Clustered	13	VC_124_0	13	0.3276	1	0.3276	2	2	2	1
Staphylococcus~phage~phi5967PVL	RefSeq-85	Caudovirales	Siphoviridae	Unassigned	125_0	Clustered	17	VC_125_0	17	0.284	1	0.284	2	2	2	0.8162
Staphylococcus~phage~phi7401PVL	RefSeq-85	Caudovirales	Siphoviridae	Unassigned	124_0	Clustered	13	VC_124_0	13	0.3276	1	0.3276	2	2	2	1
Staphylococcus~phage~phiBU01	RefSeq-85	Caudovirales	Siphoviridae	Unassigned	125_0	Clustered	17	VC_125_0	17	0.284	1	0.284	2	2	2	0.8162
Staphylococcus~phage~phiIPLA-C1C	RefSeq-85	Caudovirales	Myoviridae	Sep1virus		Overlap (VC_99/VC_104)
Staphylococcus~phage~phiIPLA-RODI	RefSeq-85	Caudovirales	Myoviridae	Kayvirus		Overlap (VC_99/VC_104)
Staphylococcus~phage~phiJB	RefSeq-85	Caudovirales	Siphoviridae	Unassigned	139_0	Clustered	37	VC_139_0	37	0.5778	1	0.5778	2	1	1	0.9159
Staphylococcus~phage~phiN315	RefSeq-85	Caudovirales	Siphoviridae	Unassigned	125_0	Clustered	17	VC_125_0	17	0.284	1	0.284	2	2	2	0.8162
Staphylococcus~phage~phiNM	RefSeq-85	Caudovirales	Siphoviridae	Phietavirus	139_0	Clustered	37	VC_139_0	37	0.5778	1	0.5778	2	1	1	0.9159
Staphylococcus~phage~phiNM3	RefSeq-85	Caudovirales	Siphoviridae	Unassigned	125_0	Clustered	17	VC_125_0	17	0.284	1	0.284	2	2	2	0.8162
Staphylococcus~phage~phiPVL-CN125	RefSeq-85	Unassigned	Unassigned	Unassigned	125_0	Clustered	17	VC_125_0	17	0.284	1	0.284	2	2	2	0.8162
Staphylococcus~phage~phiRS7	RefSeq-85	Caudovirales	Siphoviridae	Unassigned		Outlier
Staphylococcus~phage~phiSa119	RefSeq-85	Caudovirales	Siphoviridae	Unassigned	125_0	Clustered	17	VC_125_0	17	0.284	1	0.284	2	2	2	0.8162
Staphylococcus~phage~phiSA12	RefSeq-85	Caudovirales	Myoviridae	Kayvirus		Overlap (VC_99/VC_104)
Staphylococcus~phage~PT1028	RefSeq-85	Unassigned	Unassigned	Unassigned		Outlier
Staphylococcus~phage~PVL	RefSeq-85	Caudovirales	Siphoviridae	Unassigned	125_0	Clustered	17	VC_125_0	17	0.284	1	0.284	2	2	2	0.8162
Staphylococcus~phage~ROSA	RefSeq-85	Caudovirales	Siphoviridae	Unassigned	139_0	Clustered	37	VC_139_0	37	0.5778	1	0.5778	2	1	1	0.9159
Staphylococcus~phage~S24-1	RefSeq-85	Caudovirales	Podoviridae	Unassigned	221_0	Clustered	8	VC_221_0	8	0.8498	1	0.8498	2	2	2	1
Staphylococcus~phage~S25-3	RefSeq-85	Caudovirales	Myoviridae	Kayvirus		Overlap (VC_99/VC_104)
Staphylococcus~phage~S25-4	RefSeq-85	Caudovirales	Myoviridae	Kayvirus		Overlap (VC_99/VC_104)
Staphylococcus~phage~SA1	RefSeq-85	Caudovirales	Myoviridae	Unassigned	16_0	Clustered	16	VC_16_0	16	0.8255	1	0.8255	4	2	2	1
Staphylococcus~phage~SA12	RefSeq-85	Caudovirales	Siphoviridae	Unassigned	139_0	Clustered	37	VC_139_0	37	0.5778	1	0.5778	2	1	1	0.9159
Staphylococcus~phage~SA13	RefSeq-85	Caudovirales	Siphoviridae	Unassigned	139_0	Clustered	37	VC_139_0	37	0.5778	1	0.5778	2	1	1	0.9159
Staphylococcus~phage~SA97	RefSeq-85	Caudovirales	Siphoviridae	Unassigned	139_0	Clustered	37	VC_139_0	37	0.5778	1	0.5778	2	1	1	0.9159
Staphylococcus~phage~SAP-2	RefSeq-85	Caudovirales	Podoviridae	Unassigned	221_0	Clustered	8	VC_221_0	8	0.8498	1	0.8498	2	2	2	1
Staphylococcus~phage~Sb-1	RefSeq-85	Caudovirales	Myoviridae	Kayvirus		Overlap (VC_99/VC_104)
Staphylococcus~phage~SLPW	RefSeq-85	Unassigned	Unassigned	Unassigned	221_0	Clustered	8	VC_221_0	8	0.8498	1	0.8498	2	2	2	1
Staphylococcus~phage~SMSAP5	RefSeq-85	Caudovirales	Siphoviridae	Unassigned	124_0	Clustered	13	VC_124_0	13	0.3276	1	0.3276	2	2	2	1
Staphylococcus~phage~SpaA1	RefSeq-85	Caudovirales	Siphoviridae	Unassigned		Overlap (VC_114/VC_130)
Staphylococcus~phage~Stau2	RefSeq-85	Caudovirales	Myoviridae	Silviavirus		Overlap (VC_99/VC_104)
Staphylococcus~phage~StauST398-1	RefSeq-85	Caudovirales	Siphoviridae	Unassigned	139_0	Clustered	37	VC_139_0	37	0.5778	1	0.5778	2	1	1	0.9159
Staphylococcus~phage~StauST398-2	RefSeq-85	Caudovirales	Siphoviridae	Unassigned	124_0	Clustered	13	VC_124_0	13	0.3276	1	0.3276	2	2	2	1
Staphylococcus~phage~StauST398-3	RefSeq-85	Caudovirales	Siphoviridae	Unassigned	139_0	Clustered	37	VC_139_0	37	0.5778	1	0.5778	2	1	1	0.9159
Staphylococcus~phage~StauST398-4	RefSeq-85	Caudovirales	Siphoviridae	Unassigned	125_0	Clustered	17	VC_125_0	17	0.284	1	0.284	2	2	2	0.8162
Staphylococcus~phage~StauST398-5	RefSeq-85	Caudovirales	Siphoviridae	Unassigned	139_0	Clustered	37	VC_139_0	37	0.5778	1	0.5778	2	1	1	0.9159
Staphylococcus~phage~StB12	RefSeq-85	Caudovirales	Siphoviridae	Unassigned		Outlier
Staphylococcus~phage~StB20	RefSeq-85	Caudovirales	Siphoviridae	Unassigned		Outlier
Staphylococcus~phage~StB20-like	RefSeq-85	Caudovirales	Siphoviridae	Unassigned		Outlier
Staphylococcus~phage~StB27	RefSeq-85	Caudovirales	Siphoviridae	Unassigned		Outlier
Staphylococcus~phage~Team1	RefSeq-85	Caudovirales	Myoviridae	kayvirus		Overlap (VC_99/VC_104)
Staphylococcus~phage~TEM123	RefSeq-85	Caudovirales	Siphoviridae	Unassigned		Outlier
Staphylococcus~phage~tp310-1	RefSeq-85	Unassigned	Unassigned	Unassigned	125_0	Clustered	17	VC_125_0	17	0.284	1	0.284	2	2	2	0.8162
Staphylococcus~phage~tp310-2	RefSeq-85	Caudovirales	Siphoviridae	Unassigned	124_0	Clustered	13	VC_124_0	13	0.3276	1	0.3276	2	2	2	1
Staphylococcus~phage~tp310-3	RefSeq-85	Unassigned	Unassigned	Unassigned	125_0	Clustered	17	VC_125_0	17	0.284	1	0.284	2	2	2	0.8162
Staphylococcus~phage~Twort	RefSeq-85	Caudovirales	Myoviridae	Twortvirus		Overlap (VC_99/VC_104)
Staphylococcus~phage~vB_SauM_Remus	RefSeq-85	Caudovirales	Myoviridae	Silviavirus		Overlap (VC_99/VC_104)
Staphylococcus~phage~vB_SauM_Romulus	RefSeq-85	Caudovirales	Myoviridae	Silviavirus		Overlap (VC_99/VC_104)
Staphylococcus~phage~vB_SauS_phi2	RefSeq-85	Caudovirales	Siphoviridae	Unassigned	124_0	Clustered	13	VC_124_0	13	0.3276	1	0.3276	2	2	2	1
Staphylococcus~phage~vB_SepS_SEP9	RefSeq-85	Caudovirales	Siphoviridae	Sextaecvirus	142_0	Clustered	2	VC_142_0	2	0.3051	0.955302	0.2915	1	1	1	1
Staphylococcus~phage~YMC/09/04/R1988	RefSeq-85	Caudovirales	Siphoviridae	Unassigned	124_0	Clustered	13	VC_124_0	13	0.3276	1	0.3276	2	2	2	1
Staphylococcus~prophage~phiPV83	RefSeq-85	Caudovirales	Siphoviridae	Unassigned	125_0	Clustered	17	VC_125_0	17	0.284	1	0.284	2	2	2	0.8162
Staphylococcus~virus~108PVL	RefSeq-85	Caudovirales	Siphoviridae	Biseptimavirus	125_0	Clustered	17	VC_125_0	17	0.284	1	0.284	2	2	2	0.8162
Staphylococcus~virus~11	RefSeq-85	Caudovirales	Siphoviridae	Phietavirus	139_0	Clustered	37	VC_139_0	37	0.5778	1	0.5778	2	1	1	0.9159
Staphylococcus~virus~13	RefSeq-85	Caudovirales	Siphoviridae	Biseptimavirus	125_0	Clustered	17	VC_125_0	17	0.284	1	0.284	2	2	2	0.8162
Staphylococcus~virus~187	RefSeq-85	Caudovirales	Siphoviridae	Phietavirus	139_0	Clustered	37	VC_139_0	37	0.5778	1	0.5778	2	1	1	0.9159
Staphylococcus~virus~29	RefSeq-85	Caudovirales	Siphoviridae	Phietavirus	139_0	Clustered	37	VC_139_0	37	0.5778	1	0.5778	2	1	1	0.9159
Staphylococcus~virus~37	RefSeq-85	Caudovirales	Siphoviridae	Phietavirus		Outlier
Staphylococcus~virus~3a	RefSeq-85	Caudovirales	Siphoviridae	Triavirus	124_0	Clustered	13	VC_124_0	13	0.3276	1	0.3276	2	2	2	1
Staphylococcus~virus~42e	RefSeq-85	Caudovirales	Siphoviridae	Triavirus	124_0	Clustered	13	VC_124_0	13	0.3276	1	0.3276	2	2	2	1
Staphylococcus~virus~47	RefSeq-85	Caudovirales	Siphoviridae	Triavirus	124_0	Clustered	13	VC_124_0	13	0.3276	1	0.3276	2	2	2	1
Staphylococcus~virus~52a	RefSeq-85	Caudovirales	Siphoviridae	Phietavirus	139_0	Clustered	37	VC_139_0	37	0.5778	1	0.5778	2	1	1	0.9159
Staphylococcus~virus~53	RefSeq-85	Caudovirales	Siphoviridae	Phietavirus	139_0	Clustered	37	VC_139_0	37	0.5778	1	0.5778	2	1	1	0.9159
Staphylococcus~virus~55	RefSeq-85	Caudovirales	Siphoviridae	Phietavirus	139_0	Clustered	37	VC_139_0	37	0.5778	1	0.5778	2	1	1	0.9159
Staphylococcus~virus~69	RefSeq-85	Caudovirales	Siphoviridae	Phietavirus	139_0	Clustered	37	VC_139_0	37	0.5778	1	0.5778	2	1	1	0.9159
Staphylococcus~virus~71	RefSeq-85	Caudovirales	Siphoviridae	Phietavirus	139_0	Clustered	37	VC_139_0	37	0.5778	1	0.5778	2	1	1	0.9159
Staphylococcus~virus~77	RefSeq-85	Caudovirales	Siphoviridae	Biseptimavirus	125_0	Clustered	17	VC_125_0	17	0.284	1	0.284	2	2	2	0.8162
Staphylococcus~virus~80	RefSeq-85	Caudovirales	Siphoviridae	Phietavirus	139_0	Clustered	37	VC_139_0	37	0.5778	1	0.5778	2	1	1	0.9159
Staphylococcus~virus~80alpha	RefSeq-85	Caudovirales	Siphoviridae	Phietavirus	139_0	Clustered	37	VC_139_0	37	0.5778	1	0.5778	2	1	1	0.9159
Staphylococcus~virus~85	RefSeq-85	Caudovirales	Siphoviridae	Phietavirus	139_0	Clustered	37	VC_139_0	37	0.5778	1	0.5778	2	1	1	0.9159
Staphylococcus~virus~88	RefSeq-85	Caudovirales	Siphoviridae	Phietavirus	139_0	Clustered	37	VC_139_0	37	0.5778	1	0.5778	2	1	1	0.9159
Staphylococcus~virus~92	RefSeq-85	Caudovirales	Siphoviridae	Phietavirus	139_0	Clustered	37	VC_139_0	37	0.5778	1	0.5778	2	1	1	0.9159
Staphylococcus~virus~96	RefSeq-85	Caudovirales	Siphoviridae	Phietavirus	139_0	Clustered	37	VC_139_0	37	0.5778	1	0.5778	2	1	1	0.9159
Staphylococcus~virus~CNPH82	RefSeq-85	Caudovirales	Siphoviridae	Phietavirus		Outlier
Staphylococcus~virus~EW	RefSeq-85	Caudovirales	Siphoviridae	Phietavirus		Outlier
Staphylococcus~virus~G1	RefSeq-85	Caudovirales	Myoviridae	Kayvirus		Overlap (VC_99/VC_104)
Staphylococcus~virus~IPLA35	RefSeq-85	Caudovirales	Siphoviridae	Triavirus	124_0	Clustered	13	VC_124_0	13	0.3276	1	0.3276	2	2	2	1
Staphylococcus~virus~IPLA5	RefSeq-85	Caudovirales	Siphoviridae	Phietavirus		Outlier
Staphylococcus~virus~IPLA7	RefSeq-85	Caudovirales	Siphoviridae	Phietavirus		Outlier
Staphylococcus~virus~IPLA88	RefSeq-85	Caudovirales	Siphoviridae	Phietavirus	139_0	Clustered	37	VC_139_0	37	0.5778	1	0.5778	2	1	1	0.9159
Staphylococcus~virus~K	RefSeq-85	Caudovirales	Myoviridae	Kayvirus		Overlap (VC_99/VC_104)
Staphylococcus~virus~PH15	RefSeq-85	Caudovirales	Siphoviridae	Phietavirus		Outlier
Staphylococcus~virus~phi12	RefSeq-85	Caudovirales	Siphoviridae	Triavirus	124_0	Clustered	13	VC_124_0	13	0.3276	1	0.3276	2	2	2	1
Staphylococcus~virus~phiETA	RefSeq-85	Caudovirales	Siphoviridae	Phietavirus	139_0	Clustered	37	VC_139_0	37	0.5778	1	0.5778	2	1	1	0.9159
Staphylococcus~virus~phiETA2	RefSeq-85	Caudovirales	Siphoviridae	Phietavirus	139_0	Clustered	37	VC_139_0	37	0.5778	1	0.5778	2	1	1	0.9159
Staphylococcus~virus~phiETA3	RefSeq-85	Caudovirales	Siphoviridae	Phietavirus	139_0	Clustered	37	VC_139_0	37	0.5778	1	0.5778	2	1	1	0.9159
Staphylococcus~virus~phiMR11	RefSeq-85	Caudovirales	Siphoviridae	Phietavirus	139_0	Clustered	37	VC_139_0	37	0.5778	1	0.5778	2	1	1	0.9159
Staphylococcus~virus~phiMR25	RefSeq-85	Caudovirales	Siphoviridae	Phietavirus	139_0	Clustered	37	VC_139_0	37	0.5778	1	0.5778	2	1	1	0.9159
Staphylococcus~virus~phiNM2	RefSeq-85	Caudovirales	Siphoviridae	Phietavirus	139_0	Clustered	37	VC_139_0	37	0.5778	1	0.5778	2	1	1	0.9159
Staphylococcus~virus~phiNM4	RefSeq-85	Caudovirales	Siphoviridae	Phietavirus	139_0	Clustered	37	VC_139_0	37	0.5778	1	0.5778	2	1	1	0.9159
Staphylococcus~virus~phiSLT	RefSeq-85	Caudovirales	Siphoviridae	Triavirus	124_0	Clustered	13	VC_124_0	13	0.3276	1	0.3276	2	2	2	1
Staphylococcus~virus~SA11	RefSeq-85	Caudovirales	Myoviridae	Silviavirus		Overlap (VC_99/VC_104)
Staphylococcus~virus~SAP26	RefSeq-85	Caudovirales	Siphoviridae	Phietavirus	139_0	Clustered	37	VC_139_0	37	0.5778	1	0.5778	2	1	1	0.9159
Staphylococcus~virus~X2	RefSeq-85	Caudovirales	Siphoviridae	Phietavirus	139_0	Clustered	37	VC_139_0	37	0.5778	1	0.5778	2	1	1	0.9159
[truncated: 277 more rows]

## Sheet: Table S7
Supplementary Table S7 Adjusted coverage of 33 vOTUs per gigabase of metagenome for two glacier-ice viromes
#vOTU	D25	D49
D25_60_38549	87.0696	0
D25_4_93811	26.2299	0
D25_9_70857	20.8643	0
D25_103_30846	20.2916	0
D25_468_12041	13.1241	0
D25_22_20338	12.7783	0
D25_78_35271	12.4402	0
D25_13_66736	12.1027	0
D25_67_37866	9.18946	0
D25_81_34458	5.81594	0
D49_170_39214	94.9538	34.668
D49_576_17121	92.9296	32.4573
D25_155_13915	81.1912	27.6309
D25_167_23225	31.8743	17.6643
D25_52_40430	29.624	16.6625
D49_215_34563	6.01261	16.8645
D49_405_21683	5.87727	7.32427
D25_14_65719	10.053	6.06118
D49_418_21421	4.55935	3.39617
D49_491_18969	4.43432	6.12914
D49_255_30828	3.427	4.76354
D49_318_25163	2.41046	4.17745
D49_323_24828	1.85872	2.83431
D49_45_79914	0	26.9247
D49_69_66536	0	3.88995
D49_130_45441	0	3.49802
D49_133_44515	0	3.48385
D49_912_12412	0	3.38746
D49_742_14269	0	3.36072
D49_150_41592	0	3.1885
D49_333_24415	0	2.91809
D49_117_49836	0	2.86976
D49_344_23890	0	2.76973

## Sheet: Table S8
Supplementary Table S8 Predicted hosts taxonomy by sequence similarity method (Blastn). The adjusted coverages (per gigabase of metagenome) of the 33 vOTUs were provided.
#vOTU	D25	D49	taxonomy	species	accession No. of host genome sequence	% identity	alignment length	% query coverage per subject	% query coverage per hsp	mismatches	gap opens	q. start	q. end	s. start	s. end	evalue	bit score
D25_60_38549	87.0696	0	Unknown
D25_4_93811	26.2299	0	Bacteria;Proteobacteria;Betaproteobacteria;Burkholderiales;Oxalobacteraceae;Janthinobacterium	Janthinobacterium sp. CG23_2, whole genome shotgun sequence	FAOS01000002.1	75.508	2262	3	2	497	50	58700	60934	53516	51285	0	1055
D25_9_70857	20.8643	0	Unknown
D25_103_30846	20.2916	0	Unknown
D25_468_12041	13.1241	0	Unknown
D25_22_20338	12.7783	0	Unknown
D25_78_35271	12.4402	0	Unknown
D25_13_66736	12.1027	0	Unknown
D25_67_37866	9.18946	0	Unknown
D25_81_34458	5.81594	0	Unknown
D49_170_39214	94.9538	34.668	Bacteria;Proteobacteria;Alphaproteobacteria;Rhizobiales;Methylobacteriaceae;Methylobacterium	Methylobacterium mesophilicum SR1.6/6 6, whole genome shotgun sequence	ANPA01000006.1	81.17	2034	23	5	318	39	22569	24586	445742	443758	0	1574
D49_576_17121	92.9296	32.4573	Bacteria;Proteobacteria;Alphaproteobacteria;Rhizobiales;Methylobacteriaceae;Methylobacterium	Methylobacterium sp. GXF4 contig69, whole genome shotgun sequence	AKFK01000066.1	90.592	3008	18	18	263	18	13220	16217	114695	117692	0	3969
D25_155_13915	81.1912	27.6309	Bacteria;Proteobacteria;Alphaproteobacteria;Rhizobiales;Methylobacteriaceae;Methylobacterium	Methylobacterium sp. GXS13 contigs9, whole genome shotgun sequence	LKKO01000102.1	91.656	8905	91	64	718	18	3823	12718	117142	108254	0	12305
D25_167_23225	31.8743	17.6643	Unknown
D25_52_40430	29.624	16.6625	Unknown
D49_215_34563	6.01261	16.8645	Bacteria;Proteobacteria;Gammaproteobacteria;Pseudomonadales;Pseudomonadaceae;Pseudomonas	Pseudomonas veronii 1YdBTEX2 Contig22, whole genome shotgun sequence	AOUH01000022.1	84.902	9955	49	29	1368	97	9982	19860	177959	168064	0	9932
D49_405_21683	5.87727	7.32427	Unknown
D25_14_65719	10.053	6.06118	Bacteria;Proteobacteria;Alphaproteobacteria;Rhizobiales;Methylobacteriaceae;Methylobacterium	Methylobacterium platani JCM 14648 contig_221, whole genome shotgun sequence	JXOD01000221.1	82.729	2594	4	4	347	79	47442	49991	11845	9309	0	2215
D49_418_21421	4.55935	3.39617	Bacteria;Proteobacteria;Alphaproteobacteria;Rhizobiales;Methylobacteriaceae;Methylobacterium	Methylobacterium platani strain PMB02 contig037, whole genome shotgun sequence	LWHQ01000037.1	87.902	6373	61	47	719	41	3	6340	99422	105777	0	7450
D49_491_18969	4.43432	6.12914	Unknown
D49_255_30828	3.427	4.76354	Bacteria;Actinobacteria;Actinobacteria_c;Micrococcales;Micrococcaceae;Renibacterium	Renibacterium salmoninarum ATCC 33209, complete genome	NC_010168.1	79.486	2257	26	7	425	23	22349	24584	1158064	1155825	0	1568
D49_318_25163	2.41046	4.17745	Bacteria;Proteobacteria;Gammaproteobacteria;Pseudomonadales;Pseudomonadaceae;Pseudomonas	Pseudomonas fluorescens SBW25 complete genome	NC_012660.1	87.482	6782	55	27	817	25	11913	18683	3145397	3152157	0	7792
D49_323_24828	1.85872	2.83431	Bacteria;Proteobacteria;Gammaproteobacteria;Pseudomonadales;Pseudomonadaceae;Pseudomonas	Pseudomonas sp. CBZ-4 contig000101, whole genome shotgun sequence	ANNV01000101.1	92.47	3121	29	13	229	5	3972	7089	74949	78066	0	4457
D49_45_79914	0	26.9247	Unknown
D49_69_66536	0	3.88995	Bacteria;Proteobacteria;Alphaproteobacteria;Sphingomonadales;Sphingomonadaceae;Sphingomonas	Sphingomonas sp. Y57 scaffold33, whole genome shotgun sequence	LDES01000033.1	79.103	2943	13	6	541	62	14924	17832	16504	13602	0	1960
D49_130_45441	0	3.49802	Bacteria;Proteobacteria;Alphaproteobacteria;Sphingomonadales;Sphingomonadaceae;Sphingomonas	Sphingomonas sp. YL-JM2C contig174, whole genome shotgun sequence	ASTM01000174.1	82.753	3647	12	8	530	67	39656	43235	26454	22840	0	3158
D49_133_44515	0	3.48385	Unknown
D49_912_12412	0	3.38746	Unknown
D49_742_14269	0	3.36072	Unknown
D49_150_41592	0	3.1885	Unknown
D49_333_24415	0	2.91809	Bacteria;Proteobacteria;Betaproteobacteria;Burkholderiales;Comamonadaceae;Roseateles	Roseateles depolymerans strain KCTC 42856, complete genome	CP013729.1	87.552	6057	56	25	725	22	74	6119	2584093	2578055	0	6981
D49_117_49836	0	2.86976	Bacteria;Proteobacteria;Betaproteobacteria;Burkholderiales;Comamonadaceae;Roseateles	Roseateles depolymerans strain KCTC 42856, complete genome	CP013729.1	88.466	3234	75	18	343	25	3	3220	2584135	2587354	0	3879
D49_344_23890	0	2.76973	Unknown

## Sheet: Table S9
Supplementary Table S9 Predicted hosts taxonomy by sequence composition method (VirHostMatcher). The adjusted coverages (per gigabase of metagenome) of the 33 vOTUs were provided.
#vOTU	D25	D49	taxonomy
D25_60_38549	87.0696	0	Unknown
D25_4_93811	26.2299	0	Bacteria; Proteobacteria; Betaproteobacteria; Burkholderiales; Oxalobacteraceae
D25_9_70857	20.8643	0	Bacteria; Proteobacteria; Betaproteobacteria; Burkholderiales
D25_103_30846	20.2916	0	Unknown
D25_468_12041	13.1241	0	Unknown
D25_22_20338	12.7783	0	Unknown
D25_78_35271	12.4402	0	Unknown
D25_13_66736	12.1027	0	Unknown
D25_67_37866	9.18946	0	Unknown
D25_81_34458	5.81594	0	Unknown
D49_170_39214	94.9538	34.668	Bacteria; Proteobacteria; Alphaproteobacteria; Rhizobiales; Methylobacteriaceae; Methylobacterium
D49_576_17121	92.9296	32.4573	Bacteria; Proteobacteria; Alphaproteobacteria; Rhizobiales; Methylobacteriaceae; Methylobacterium
D25_155_13915	81.1912	27.6309	Unknown
D25_167_23225	31.8743	17.6643	Unknown
D25_52_40430	29.624	16.6625	Unknown
D49_215_34563	6.01261	16.8645	Unknown
D49_405_21683	5.87727	7.32427	Unknown
D25_14_65719	10.053	6.06118	Bacteria; Proteobacteria; Alphaproteobacteria; Rhizobiales; Methylobacteriaceae; Methylobacterium
D49_418_21421	4.55935	3.39617	Unknown
D49_491_18969	4.43432	6.12914	Unknown
D49_255_30828	3.427	4.76354	Unknown
D49_318_25163	2.41046	4.17745	Unknown
D49_323_24828	1.85872	2.83431	Unknown
D49_45_79914	0	26.9247	Bacteria; Actinobacteria; Actinobacteria; Micrococcales; Microbacteriaceae; Microbacterium
D49_69_66536	0	3.88995	Bacteria; Proteobacteria; Alphaproteobacteria; Sphingomonadales; Sphingomonadaceae
D49_130_45441	0	3.49802	Unknown
D49_133_44515	0	3.48385	Bacteria; Proteobacteria; Alphaproteobacteria; Sphingomonadales; Sphingomonadaceae
D49_912_12412	0	3.38746	Unknown
D49_742_14269	0	3.36072	Unknown
D49_150_41592	0	3.1885	Unknown
D49_333_24415	0	2.91809	Unknown
D49_117_49836	0	2.86976	Bacteria; Proteobacteria
D49_344_23890	0	2.76973	Unknown

## Sheet: Table S10
Supplementary Table S10 Predicted hosts taxonomy by CRISPR similarity method. The adjusted coverages (per gigabase of metagenome) of the 33 vOTUs were provided.
#vOTU	D25	D49	taxonomy
D25_60_38549	87.0696	0	Unknown
D25_4_93811	26.2299	0	Unknown
D25_9_70857	20.8643	0	Unknown
D25_103_30846	20.2916	0	Unknown
D25_468_12041	13.1241	0	Unknown
D25_22_20338	12.7783	0	Unknown
D25_78_35271	12.4402	0	Unknown
D25_13_66736	12.1027	0	Unknown
D25_67_37866	9.18946	0	Bacteria; Proteobacteria; Betaproteobacteria; Burkholderiales; Burkholderiaceae; Burkholderia
D25_81_34458	5.81594	0	Unknown
D49_170_39214	94.9538	34.668	Unknown
D49_576_17121	92.9296	32.4573	Unknown
D25_155_13915	81.1912	27.6309	Unknown
D25_167_23225	31.8743	17.6643	Unknown
D25_52_40430	29.624	16.6625	Unknown
D49_215_34563	6.01261	16.8645	Bacteria; Proteobacteria; Gammaproteobacteria; Pseudomonadales; Pseudomonadaceae; Pseudomonas
D49_405_21683	5.87727	7.32427	Unknown
D25_14_65719	10.053	6.06118	Unknown
D49_418_21421	4.55935	3.39617	Unknown
D49_491_18969	4.43432	6.12914	Unknown
D49_255_30828	3.427	4.76354	Unknown
D49_318_25163	2.41046	4.17745	Unknown
D49_323_24828	1.85872	2.83431	Unknown
D49_45_79914	0	26.9247	Unknown
D49_69_66536	0	3.88995	Unknown
D49_130_45441	0	3.49802	Unknown
D49_133_44515	0	3.48385	Unknown
D49_912_12412	0	3.38746	Unknown
D49_742_14269	0	3.36072	Unknown
D49_150_41592	0	3.1885	Unknown
D49_333_24415	0	2.91809	Unknown
D49_117_49836	0	2.86976	Unknown
D49_344_23890	0	2.76973	Unknown

[truncated: 5 more sheets: Table S11, Table S12, Table S13, Table S14, Table S15]
